# Supplementary material for: Modelling-based evaluation of the costs, benefits and cost-effectiveness of multipathogen point-of-care tests for sexually transmitted infections in symptomatic genitourinary medicine clinic attendees
Source: PubMed Central journal article supplement — BMJ Open. 2018 Sep 10;8(9):e020394. doi: 10.1136/bmjopen-2017-020394 (PMC6144481; doi:10.1136/bmjopen-2017-020394), 2018-09-10
Supplement: bmjopen-2017-020394.draft_revisions.pdf [file bmjopen-2017-020394.draft_revisions.pdf]

# BMJ Open

BMJ Open is committed to open peer review. As part of this commitment we make the peer review history of every article we publish publicly available.

When an article is published we post the peer reviewers' comments and the authors' responses online. We also post the versions of the paper that were used during peer review. These are the versions that the peer review comments apply to.

The versions of the paper that follow are the versions that were submitted during the peer review process. They are not the versions of record or the final published versions. They should not be cited or distributed as the published version of this manuscript.

BMJ Open is an open access journal and the full, final, typeset and author-corrected version of record of the manuscript is available on our site with no access controls, subscription charges or pay-per-view fees (<http://bmjopen.bmj.com>).

If you have any questions on BMJ Open's open peer review process please email [info.bmjopen@bmj.com](mailto:info.bmjopen@bmj.com)

# BMJ Open

## Evaluating the costs, benefits and cost-effectiveness of multi-pathogen point-of-care tests for sexually transmitted infections in symptomatic genitourinary medicine clinic attendees

|                                 |                                                                                                                                                                                                                                                                                                                                                                                                                                                                                                                                                                                                                                                                                                                                                                                                                 |
|---------------------------------|-----------------------------------------------------------------------------------------------------------------------------------------------------------------------------------------------------------------------------------------------------------------------------------------------------------------------------------------------------------------------------------------------------------------------------------------------------------------------------------------------------------------------------------------------------------------------------------------------------------------------------------------------------------------------------------------------------------------------------------------------------------------------------------------------------------------|
| Journal:                        | <i>BMJ Open</i>                                                                                                                                                                                                                                                                                                                                                                                                                                                                                                                                                                                                                                                                                                                                                                                                 |
| Manuscript ID                   | bmjopen-2017-020394                                                                                                                                                                                                                                                                                                                                                                                                                                                                                                                                                                                                                                                                                                                                                                                             |
| Article Type:                   | Research                                                                                                                                                                                                                                                                                                                                                                                                                                                                                                                                                                                                                                                                                                                                                                                                        |
| Date Submitted by the Author:   | 31-Oct-2017                                                                                                                                                                                                                                                                                                                                                                                                                                                                                                                                                                                                                                                                                                                                                                                                     |
| Complete List of Authors:       | Huntington, Susie; Aquarius Population Health Limited<br>Burns, Richéal; Aquarius Population Health Limited<br>Harding- Esch, Emma; Public Health England, HIV & STI; St George's University of London, Applied Diagnostic Research and Evaluation Unit, Institute for Infection & Immunity<br>Harvey , Michael; Aquarius Population Health Limited<br>Hill-Tout, Rachel; St George's University Hospitals NHS Foundation Trust<br>Fuller, Sebastian; St George's University of London, Applied Diagnostic Research and Evaluation Unit, Institute for Infection & Immunity<br>Adams, Elisabeth; Aquarius Population Health Limited<br>Sadiq, S. Tariq; Public Health England, HIV & STI; St George's University of London, Applied Diagnostic Research and Evaluation Unit, Institute for Infection & Immunity |
| <b>Primary Subject Heading</b>: | Sexual health                                                                                                                                                                                                                                                                                                                                                                                                                                                                                                                                                                                                                                                                                                                                                                                                   |
| Secondary Subject Heading:      | Diagnostics, Health economics, Infectious diseases, Health services research                                                                                                                                                                                                                                                                                                                                                                                                                                                                                                                                                                                                                                                                                                                                    |
| Keywords:                       | GENITOURINARY MEDICINE, HEALTH ECONOMICS, Molecular diagnostics < INFECTIOUS DISEASES                                                                                                                                                                                                                                                                                                                                                                                                                                                                                                                                                                                                                                                                                                                           |
|                                 |                                                                                                                                                                                                                                                                                                                                                                                                                                                                                                                                                                                                                                                                                                                                                                                                                 |

SCHOLARONE™  
Manuscripts

1  
2  
3 **Evaluating the costs, benefits and cost-effectiveness of multi-pathogen point-of-care tests for**  
4 **sexually transmitted infections in symptomatic genitourinary medicine clinic attendees**  
5  
6  
7

8 Susie E Huntington<sup>1</sup>, Richéal M Burns<sup>1</sup>, Emma Harding-Esch<sup>2,3</sup>, Michael J Harvey<sup>1</sup>, Rachel Hill-Tout<sup>4</sup>,  
9 Sebastian S Fuller<sup>3</sup>, \*Elisabeth J Adams<sup>1</sup>, \*S Tariq Sadiq<sup>2,3,4</sup>  
10  
11

- 12 1. Aquarius Population Health, 58a Highgate High Street, London, N6 5HX, UK  
13 2. HIV/STI Department, National Infection Service, Public Health England, 61 Colindale Avenue,  
14 London, NW9 5EQ, UK  
15 3. Applied Diagnostic Research and Evaluation Unit, Institute for Infection and Immunity, St George's,  
16 University of London, Cranmer Terrace, London, SW17 0RE, UK  
17 4. St George's University Hospitals NHS Foundation Trust, Blackshaw Road, Tooting, London, SW17  
18 0QT.  
19  
20  
21  
22  
23  
24

25 \*Joint senior authors.  
26

27 Correspondence to: Dr Tariq Sadiq ssadiq@sgul.ac.uk. Tel: 020 8725 5740/3355 Institute for Infection  
28 and Immunity, St George's, University of London, Cranmer Terrace, London, SW17 0RE, UK  
29  
30  
31  
32

33 Word Count: 3095  
34  
35  
36  
37  
38  
39  
40  
41  
42  
43  
44  
45  
46  
47  
48  
49  
50  
51  
52  
53  
54  
55  
56  
57  
58  
59  
60

## Abstract

**Objectives:** To quantify the costs, benefits and cost-effectiveness of three multi-pathogen point-of-care (POC) testing strategies for detecting common sexually transmitted infections (STIs) compared with standard laboratory testing.

**Design:** Modelling study.

**Setting:** Genitourinary medicine (GUM) services in England.

**Population:** A hypothetical cohort of 965,988 people, representing the annual number attending GUM services symptomatic of lower genitourinary tract infection.

**Interventions:** The decision tree model considered costs and reimbursement to GUM services associated with diagnosing and managing STIs. Three strategies using hypothetical point-of-care tests (POCTs) were compared to standard care (SC) using laboratory-based testing. The strategies were: A) dual POC test (POCT) for *Chlamydia trachomatis* (CT) and *Neisseria gonorrhoeae* (NG); B) triplex POCT for CT-NG and *Mycoplasma genitalium* (MG); C) quadruplex POCT for CT-NG-MG and *Trichomonas vaginalis* (TV). Data came from published literature and unpublished estimates.

**Primary and secondary outcome measures:** Primary outcomes were total costs and benefits (quality-adjusted life years [QALYs]) for each strategy (2016 GB £) and associated incremental cost-effectiveness ratios (ICERs) between each of the POC strategies and SC. Secondary outcomes were inappropriate treatment of STIs, onward STI transmission, pelvic inflammatory disease in women, time to cure and total attendances.

**Results:** In the base-case analysis, POC strategy C, a quadruplex POCT, was the most cost-effective relative to the other strategies, with an ICER of £36,585 per QALY gained compared to SC when using micro-costing, and cost-savings of £26,451,382 when using tariff costing. POC strategy C also generated the most benefits, with 240,467 fewer clinic attendances, 808 fewer onward STI transmissions, and 235,135 averted inappropriate treatments compared to SC.

**Conclusions:** Many benefits can be achieved by using multi-pathogen POCTs to improve STI diagnosis and management. Further evidence is needed on the underlying prevalence of STIs and SC delivery in the UK to reduce uncertainty in economic analyses.

1  
2  
3 Strengths and limitations of this study  
4

- 5
- 6 • The main strength of this study is that it presents the first estimates of the potential public  
7 health impact of multi-pathogen POCT strategies made possible by emerging diagnostic  
8 technologies.
  - 9 • The model used inputs from multiple sources including published studies, published data (for  
10 costs), national surveillance data plus expert opinion and in incorporated uncertainty in  
11 multiple input parameters by using a second order Monte Carlo PSA and numerous scenarios  
12 were assessed in sensitivity analysis.
  - 13 • The main limitations were the paucity of published data on treatment pathways and gaps in  
14 treatment guidelines, which made building a representative SC pathway problematic. There  
15 were few published data for some input parameters, for example, the percentage of patients  
16 who are presumptively treated without a microbiological result, or percentage returning to  
17 clinics after initial treatment.  
18  
19  
20  
21  
22  
23  
24  
25  
26  
27  
28  
29  
30  
31  
32  
33  
34  
35  
36  
37  
38  
39  
40  
41  
42  
43  
44  
45  
46  
47  
48  
49  
50  
51  
52  
53  
54  
55  
56  
57  
58  
59  
60

## Introduction

Continued high transmission rates of sexually transmitted infections (STIs) that cause treatable lower genital tract discharge syndromes (GDS) are a major public health concern. This causes significant reproductive-health long-term sequelae<sup>1-4</sup> and frequently necessitates empirical therapy to minimise treatment delay, which often results in misdirected treatment, poor antimicrobial stewardship and the spread of antimicrobial resistance.<sup>5,6</sup> Among the common causes of GDS, there were 107,252 and 39,696 diagnoses of *Chlamydia trachomatis* (CT) and *Neisseria gonorrhoeae* (NG), respectively, made in English genitourinary medicine (GUM) services in 2015<sup>7</sup>, with smaller numbers of *Trichomonas vaginalis* (TV) and *Mycoplasma genitalium* (MG) diagnoses.

The decision to give empirical antimicrobial therapy in symptomatic patients is usually guided by results of immediate microscopy of genital discharge, but this has low sensitivity, missing up to half of NG/TV infections in women<sup>8</sup> and particularly poor specificity for predicting CT or MG. Accurate routine diagnosis, which requires laboratory-based nucleic acid amplification tests (NAATs), can take up to two weeks for results to be processed and most GUM services do not routinely conduct NAATs for MG or TV. Many patients are presumptively treated with either azithromycin or doxycycline, which are effective against CT but respectively cure only two-thirds and one-third of MG infections<sup>9</sup> and neither antimicrobial is effective against TV.<sup>9</sup>

Emerging technologies are being developed that allow rapid and accurate point-of-care tests (POCTs) for multiple sexually transmitted infections, solutions which could address these challenges and help improve patient and public health outcomes. However, health services are under increasing financial pressure, and implementing new technologies may be prohibitively costly for both providers and commissioners of healthcare. There is currently only one commercially available rapid NAAT for CT and NG, which has equivalent performance to laboratory NAATs (Cepheid GeneXpert).<sup>10</sup> Previous economic evaluations of NAAT POCTs for CT and NG indicate that they are likely to provide a cost-effective strategy for screening GUM attendees.<sup>5,11</sup> To inform decision making by groups developing multi-pathogen POCTs and clinics which would likely use such tests, we assessed costs, benefits and cost-effectiveness of three testing strategies using hypothetical NAAT POCTs for A) CT-NG, B) CT-NG-MG and C) CT-NG-MG-TV compared with laboratory-based CT-NG NAAT testing.

## Methods

### Creating a model structure

A decision tree model was constructed using Microsoft Excel (v.2016) to simulate a hypothetical cohort of people with symptoms of a lower genitourinary tract infection attending English GUM services. The base-case analysis, using assumptions provided in Supplementary Table 1, compared complete pathway costs of three point-of-care (POC) strategies to the current practice of using microscopy plus a laboratory CT-NG NAAT. The POC strategies used microscopy plus a hypothetical POCT that provides results in 30 minutes for A) CT-NG; B) CT-NG-MG; C) CT-NG-MG-TV. Microscopy was used in all POC strategies as it can detect other conditions and infections not covered by the POCTs, as well as diagnosing NG and TV. The strategies were chosen in response to recent developments in STI POCT technology, reflecting pathogen configurations and performance characteristics.<sup>12,13</sup>

### Outcomes

Primary outcomes were total costs and benefits measured by quality adjusted life years (QALYs) for each strategy and associated incremental cost-effectiveness ratios (ICERs, see equation) between each of the POC strategies and standard care (SC). The ICER provides information on the additional cost per unit of additional benefit between an option and the next less expensive alternative.

$$ICER_x = \frac{Cost_{POC_x} - Cost_{Current Practice}}{QALY_{POC_x} - QALY_{Current Practice}}$$

Secondary outcomes assessed the wider health benefits and included inappropriate treatment of STIs (defined as unnecessary treatment of people with no STI plus incorrect treatment for people with an STI), onward transmission of the four STIs, pelvic inflammatory disease (PID), a serious complication of CT, NG and MG infections in women, time to cure and total GUM attendances.

### Patient pathways

Three senior clinicians at St George's University Hospitals NHS Foundation Trust, London outlined current and hypothetical POC pathways for symptomatic patients (**Error! Reference source not found.**). We assumed that treatment pathways did not vary by subgroup but that MSM had diagnostic tests from three anatomical sites (genital, pharyngeal, and rectal) at initial visit and MSW and women only had genital swabs. The model accounted for single or dual infections with NG, CT, MG and/or TV.

1  
2  
3 The cost of treating PID, was included in the model but other long-term complications associated with  
4 STI infection (e.g. infertility) and adverse drug events associated with treatment were not considered.  
5  
6 The proportion of patients lost-to-follow-up (LTFU) was estimated. It was assumed that anyone  
7 remaining in follow-up consented to diagnostic testing and, if diagnosed, accepted treatment. The  
8 decision framework assumed that individuals had a maximum of three follow-up visits and then exited  
9 the model. Drug resistance was not considered. The time horizon for the model was 56 days. It was  
10 assumed that treatment was started on the day of diagnosis.  
11  
12  
13  
14

#### 15 Epidemiology and clinical parameters

16  
17 A short online survey, distributed to members of the British Association for Sexual Health and HIV  
18 (BASHH), was used to collect data on the percentage of patients attending GUM services that are  
19 symptomatic, the percentage of patients returning after initial visits, as well as MG testing protocols,  
20 as limited data were available from published literature. The survey was completed by 23 GUM  
21 clinicians, 10 from London and 13 from elsewhere in the UK (Supplementary Table 2).  
22  
23  
24  
25

26 The total annual number of people attending English GUM services for STI testing was obtained from  
27 national surveillance data (GUMCAD 2015 data).<sup>7</sup> This was combined with the clinician survey results  
28 on the proportion of symptomatic attendees, to estimate 965,988 total symptomatic attendees and by  
29 subgroup (590,787 women, 259,064 men-who-have-sex-with-women [MSW] and 116,137 men-who-  
30 have-sex-with-men [MSM]). We assumed that hypothetical POCTs had similar sensitivity and  
31 specificity to the best performing currently available CT-NG POCTs.<sup>10</sup> The prevalence of CT, NG, MG  
32 and TV in GUM attendees (Table 1, variables 12-21) was estimated using published studies and  
33 preliminary findings from the PRECISE Study<sup>14</sup>, a study evaluating POCTs conducted by St George's,  
34 University of London and Public Health England.  
35  
36  
37  
38  
39  
40

#### 41 Cost and utility parameters

42  
43 All costs are given in 2015/16 prices (GB, £) and inflated to 2015/16 costs when based on previous  
44 estimates using the Hospital and Community Health Services (HCHS) Inflation Indices 2015.<sup>15</sup> The  
45 model considered two perspectives for costs: 1) costs to GUM services (micro-costing) associated with  
46 testing and management of NG/CT/MG/TV infections plus the cost of treating PID<sup>16</sup> and 2) NHS tariff  
47 reimbursements clinics would receive based on attendances (Table 2). Micro-costing was calculated by  
48 adapting an existing pathway model<sup>17</sup> which considers costs of staff time, diagnostic kit, drugs, and  
49 other consumables. The tariff, an estimated average first and follow-up attendance cost used for  
50 commissioning and cross-charging<sup>18</sup>, was estimated using the draft 2015/16 NHS tariff for first and  
51  
52  
53  
54  
55  
56  
57  
58  
59  
60



1  
2  
3 follow-up GUM attendances. Fixed tariffs are not affected by how treatment is administered  
4 (oral/intramuscular) or the number of tests performed.  
5

6 Costs of implementing a change in practice, including training costs, were not considered. Costs  
7 associated with testing and treating other causes of lower genitourinary tract symptoms were not  
8 considered.  
9

10  
11 Utilities, measures of health-related quality of life, were used in calculating QALYs for the health states  
12 (asymptomatic, symptomatic, or awaiting test results) incorporated in the decision analytic framework  
13 (**Error! Reference source not found. 2**).  
14

#### 15 16 Scenario and sensitivity analysis

17  
18 As well as the base-case analysis, 32 scenarios were assessed deterministically, where one or more key  
19 parameters were varied (Supplementary Table 3). Scenarios included: higher STI prevalence; lower  
20 sensitivity and specificity of POCTs; differing microscopy use; cheaper POCTs; and different LTFU rates.  
21  
22

23  
24 We performed a second order Monte Carlo probabilistic sensitivity analysis (PSA) to estimate ICERs.  
25 We converted model inputs from discrete values to distributions. For cost inputs, we used a normal  
26 distribution and varied each cost by 20% for the standard deviation. We correlated costs of POCTs  
27 against the least expensive option to ensure test costs would change equivalently to the same degree  
28 with each simulation. For clinical parameters, we used beta and normal distributions for probabilities  
29 and uniform distributions for test performance. For utilities, normal distributions were used. The PSA  
30 included 5000 simulations and was performed using recommended procedures<sup>19</sup>. Probabilities that  
31 strategies were cost-effective at a range of willingness-to-pay (WTP) thresholds per QALY gained were  
32 presented in cost-effectiveness acceptability curves (CEACs). CEACs were generated for each subgroup  
33 and the total population. Threshold costs for POCTs at which POC strategies would become cost-saving  
34 were calculated to the nearest £0.25.  
35  
36  
37  
38  
39  
40  
41  
42  
43  
44  
45  
46  
47  
48  
49  
50  
51  
52  
53  
54  
55  
56  
57  
58  
59  
60

## Results

Using micro-costing, the estimated annual cost of testing and managing CT, NG, MG and TV infections in 965,988 symptomatic individuals attending GUM was £113,058,655 using SC. This was the cheapest strategy to clinical services, with POC strategies A, B and C being increasingly expensive at £118,704,963 (5% increase), £124,842,003 (10.4% increase), and £125,313,136 (10.8% increase), respectively (Table 3). The opposite was true when using tariff costs, with SC being the most expensive for commissioners of sexual health care at £172,364,138, and POC strategy C being the least expensive, at £145,912,757 (Table 3).

Most of the total care pathway cost was the initial attendance cost. In SC, total pathway costs for women were £65,122,097, of this 93% (£60,432,050) were initial attendance costs. For POC strategy C, total pathway costs for women were £69,285,504, of which 98% (£68,041,383) were initial attendance costs.

POC strategy C provided most benefits to the full cohort. POC strategies A, B, and C increased QALYs by 124, 94 and 335, respectively compared to SC (**Error! Reference source not found.** 3 and Table 4). Time to cure was shorter and the number of total clinic visits, onward STI transmissions and PID cases were fewer in POC strategies than in SC. Compared to SC, POC strategy C resulted in 240,467 fewer clinic visits, 808 fewer onward STI transmissions, 235,135 averted inappropriate treatments and 112 fewer cases of PID.

ICERs associated with the base-case model are presented in Table 4. POC C highlights cost-effectiveness relative to other strategies yielding an ICER of £36,585 per QALY gained compared to SC when using micro-costing and cost-savings of £26,451,382 when using tariff costing.

CEACs are presented in **Error! Reference source not found.** Using micro-costing, for a WTP of £30,000/QALY, the upper threshold adopted by NICE <sup>20</sup>, SC had a 50% probability of being cost-effective overall, a 17% probability for women, a 2% probability for MSW and a 99% probability for MSM, relative to the POC strategies. For a WTP of £25,000, POC C dominates, i.e. is cheaper and yields more benefits than the other POC strategies for the total cohort, women and MSW. For MSM, SC dominates all strategies across the thresholds examined. For MSW, POC A had 65% probability of being cost-effective at a WTP threshold of £10,000 per QALY gained.

Results of 32 scenario analyses are summarised in Supplementary Tables 4-7. The proportion of patients given presumptive treatment (scenarios 21-24) impacted costs hugely. When no presumptive treatment was given (scenario 21), the cost per QALY was £7,339 and £9,092 more than SC for POC

1  
2  
3 strategies B and C respectively, whilst POC strategy A was dominated by SC. When all patients without  
4 a diagnosis were presumptively treated for CT, MG or TV, according to which infections had been  
5 ruled out (scenario 24), POC strategies A and C were dominated by SC and POC strategy B cost  
6 £64,300/QALY more than SC.  
7  
8

9  
10 When the utility score for being symptomatic was 10% less than base-case (scenario 25), cost per  
11 QALY was £15,627 more for POC strategy C than for SC. If microscopy was no longer used in POC  
12 strategies (scenario 13), cost per QALY was £16,204 and £29,594 more than SC for POC strategies B  
13 and C respectively, whilst POC strategy A was dominated by SC.  
14  
15

16  
17 If MG and TV prevalence were as high as the estimated prevalence in the US<sup>21,22</sup> (scenario 2), cost per  
18 QALY was £20,530 and £25,548 more than SC for POC strategies B and C respectively, whilst POC  
19 strategy A was dominated by SC. When POCTs were priced the same as the SC test (scenario 31), POC  
20 strategies B and C were cost-saving (using micro-costing).  
21  
22

23  
24 Holding all other parameters constant, POC strategies would be cost-saving compared to SC, if POCTs  
25 cost £19.25, £13.50 and £21.00, respectively for POCTs A, B and C.  
26  
27  
28  
29  
30  
31  
32  
33  
34  
35  
36  
37  
38  
39  
40  
41  
42  
43  
44  
45  
46  
47  
48  
49  
50  
51  
52  
53  
54  
55  
56  
57  
58  
59  
60

## DISCUSSION

### Principle findings

This study compared costs, benefits and cost-effectiveness of a laboratory-based CT-NG NAAT, with three POC strategies for: A) CT-NG; B) CT-NG-MG; C) CT-NG-MG-TV. Using our initial assumptions, for the total population using the micro-costing approach to assess direct costs to health-care services, each POC strategy cost more than SC but yielded additional benefits. The proportion of patients given presumptive treatment and the cost of the POCT kit both impacted the costs hugely. Results indicated that different strategies would be cost-effective for different patient sub-groups depending on the WTP threshold in place. POC strategy A was most cost-effective for MSW, POC strategy C for women, and SC for MSM. Whether using different testing strategies on different patient groups would be practical or acceptable was beyond the scope of this research and requires further investigation. Different results were obtained when tariff reimbursement costs were used, with POC strategy C costing the least and providing the most benefits.

### Strengths and weaknesses

Our analysis has several strengths. This is the first study to compare the cost-effectiveness of the three different STI POC strategies with SC. Comparable and consistent methods were used to construct a model with input from multiple sources including published studies, published data (for costs), national surveillance data plus expert opinion. The model incorporated uncertainty in multiple input parameters by using a second order Monte Carlo PSA and numerous scenarios were assessed in sensitivity analysis.

Potential limitations should be considered. While it is thought that most UK clinicians follow British Association for Sexual Health and HIV (BASHH) guidelines for STI testing and treatment<sup>9,23</sup>, there is diversity in the testing and management strategies employed to meet specific patient needs, both within and between clinics. This diversity, the paucity of published data on treatment pathways and gaps in treatment guidelines, made building a representative SC pathway problematic. There were few published data for some input parameters, for example, the percentage of patients who are presumptively treated without a microbiological result, or percentage returning to clinics after initial treatment. We tried to overcome this by collecting data using an online survey for GUM clinicians, albeit from a small sample size. There were few published data on utilities and sexual behaviour whilst symptomatic with an STI, whilst waiting for test results and whilst being on treatment for an STI. Both qualitative and quantitative research is needed in this area to inform future health economic analyses and to understand preferences for and impact on patients of introducing POC testing.

1  
2  
3 The costs associated with long-term complications of STIs were not considered <sup>24</sup>. This limitation  
4 means that the results are conservative, as the costs associated with SC are likely to be  
5 underestimated. However, the long-term benefits for a single round of testing were thought to be very  
6 low and to not have a major impact on the magnitude of results.  
7  
8

9  
10 Comparing the results to other studies. POC pathways generated some cost savings, primarily because  
11 patients had fewer return visits. However, these did not outweigh the higher cost of the POCTs  
12 compared to laboratory-based NAATs when estimating total pathway costs. This means that if POC  
13 testing was used, there would be expected overall cost increases based on the analysis using the  
14 micro-costing approach. This differs from previous modelling, in which a CT-NG POCT was cost saving  
15 compared to laboratory testing <sup>5</sup>. In the Turner *et al.* model, the cost of a POC attendance was £6.95  
16 cheaper than the cost of an SC attendance since the asymptomatic POC pathway was redesigned. In  
17 our model, the cost of attendance for a symptomatic patient was the same whether samples were  
18 sent to a laboratory or performed in clinic, since all symptomatic clinic attendees would require  
19 examination and microscopy.  
20  
21  
22  
23  
24  
25

26  
27 Implications for public health, clinicians and people using GUM services  
28

29 POC strategy C significantly decreased the numbers of inappropriate antibiotics given compared to SC,  
30 with over 235,000 fewer inappropriate treatments. Many of these treatments are likely to include  
31 azithromycin, which when inappropriately given can encourage spread of macrolide antibiotic  
32 resistance in MG infections <sup>6</sup>. POC strategy C also increased costs for health providers while decreasing  
33 tariff costs for commissioners, unless the “freed-up” capacity enabled by POC strategy C was used for  
34 STI screening appointments and initial assessments for symptomatic people. Although this would likely  
35 have a positive impact on public health, given GUM services in England face increasing pressure on  
36 their services with more than 2 million new attendances annually <sup>7</sup>, while local authorities equally face  
37 fiscal pressures, this work demonstrates the potential tensions between different cost-consequences  
38 for procurers and providers and public health benefits when considering implementation of novel  
39 health technologies.  
40  
41  
42  
43  
44  
45  
46  
47  
48

49 For people using GUM services, there are numerous benefits to POC testing compared to SC. People  
50 would need fewer clinic visits, saving them time and reducing LTFU and reducing their costs such as  
51 out-of-pocket expenses and productivity losses. Receiving a diagnosis at the initial attendance reduces  
52 anxiety compared to waiting for test results <sup>25</sup>. A negative result from a multi-pathogen POCT will  
53 support the development of clearer guidelines for clinicians, which could also reassure patients,  
54  
55  
56  
57  
58  
59  
60

1  
2  
3 particularly those with vague genital tract symptoms. Receiving effective treatment at initial  
4 attendance is likely to reduce the duration of symptoms and reproductive health sequelae.<sup>1,2</sup>  
5

6  
7 POCTs can also generate public health benefits from swifter diagnosis and treatment, for example,  
8 POC strategy C led to an estimated 43% fewer onward transmissions of STIs compared to SC. The  
9 ability to diagnose or rule out specific infections at first attendance enables accurate treatment and  
10 reduces inappropriate antibiotic use, crucial for good antibiotic stewardship, the economic benefits of  
11 which are substantial.<sup>26</sup>  
12  
13  
14  
15

#### 16 Unanswered questions and future research

17  
18 Although a rapid test for CT and NG is used in some GUM services, multi-pathogen configurations of  
19 CT-NG-MG-TV POCTs are not currently available. As such, likely pathways for POC strategies had to be  
20 designed based on expert opinion. Published audits of GUM patient pathways would be a useful  
21 addition to the literature. To reduce uncertainty in economic analyses around STIs, further evidence is  
22 also needed on underlying STI prevalence and the risk of onward STI transmission.  
23  
24  
25  
26

27 Patient pathways and testing protocols vary between sites and different sites see different  
28 proportions of people from the three sub-groups. As such, the costs of changing to a POC strategy will  
29 vary between sites as will the benefits and costs not considered in the model. Validated and easy to  
30 use computational tools for clinics and commissioners, which assess the economic impact of  
31 implementing any one of the POC strategies, using local population data, would increase  
32 understanding across stakeholders.  
33  
34  
35  
36  
37

#### 38 Conclusion

39  
40 In conclusion, the results suggest that although potentially more expensive, a quadruplex test for CT-  
41 NG-MG-TV is more cost-effective than SC and the other testing strategies, providing the most  
42 additional benefits to patients. Cost implications are driven by the cost of POCTs and would vary  
43 somewhat in different geographical areas due to differences in the subgroup mix and the prevalence  
44 of the four STIs.  
45  
46  
47  
48  
49  
50  
51  
52  
53  
54  
55  
56  
57  
58  
59  
60

## Footnotes

We thank Dr Hamish Mohammed, Principal Scientist (STI Epidemiology) at Public Health England for providing data and support interpreting GUMCAD data.

Contributors: All authors were involved in the conception and design of the research. STS, EHE, RHT and SF provided input into current clinical practice relating to patient pathways in GUM. SH estimated all parameter inputs and drafted the manuscript with support from EA and MH. RB developed the model with input from EA, SH and MH. All authors contributed to the interpretation of the model and approved the final version. STS acts as guarantor of the study.

Competing interests: All authors have completed the Unified Competing Interest Form and declare financial support from Innovate UK; EA, SH, MH are employees of Aquarius Population Health (APH) which reports grants from Innovate UK grant to Atlas Genetics, during the conduct of the study; other from Cepheid, St Georges University of London, Enigma Diagnostics, and AstraZeneca, on STI and POC research outside the submitted work; RB is a senior health economist at the University of Oxford, provided health economic support to Aquarius Population Health on an ad-hoc consultancy basis. STS, EHE, SF are members of the Applied Diagnostic Research and Evaluation Unit at St George's, University of London, which has received funding from Atlas Genetics, Alere, Cepheid, SpeedX and Sekisui. STS has received NIHR funding to develop a POCT with Atlas.

Funding: This work was supported by Innovate UK SBRI grant no. 971452, awarded to Atlas Genetics Ltd. Atlas Genetics and Innovate UK had no role in the study design; in the collection, analysis, and interpretation of data; in the writing of the report; and in the decision to submit the article for publication.

Ethical approval: Not required.

All authors had full access to the data (including statistical reports and tables) in the study and can take responsibility for the integrity of the data and the accuracy of the data analysis.

Transparency: The senior author (STS) affirms that the manuscript is an honest, accurate, and transparent account of the study being reported, that no important aspects of the study have been omitted, and that any discrepancies from the study as planned (and, if relevant, registered) have been explained.

Data sharing: no additional data available.

## References

- 1 Oakeshott P, Aghaizu A, Hay P, *et al*. Is *Mycoplasma genitalium* in women the “New Chlamydia?” A community-based prospective cohort study. *Clin Infect Dis* 2010;51:1160–6.
- 2 Price MJ, Ades AE, De Angelis D, *et al*. Risk of pelvic inflammatory disease following *Chlamydia trachomatis* infection: analysis of prospective studies with a multistate model. *Am J Epidemiol* 2013;178:484–92.
- 3 Liu B, Roberts CL, Clarke M, *et al*. Chlamydia and gonorrhoea infections and the risk of adverse obstetric outcomes: a retrospective cohort study. *Sex Transm Infect* 2013;89:672–8.
- 4 Hitti J, Garcia P, Totten P, *et al*. Correlates of cervical *Mycoplasma genitalium* and risk of preterm birth among Peruvian women. *Sex Transm Dis* 2010;37:81–5.
- 5 Turner KME, Round J, Horner P, *et al*. An early evaluation of clinical and economic costs and benefits of implementing point of care NAAT tests for *Chlamydia trachomatis* and *Neisseria gonorrhoea* in genitourinary medicine clinics in England. *Sex Transm Infect* 2013;sextrans-2013-051147.
- 6 Jensen JS, Bradshaw C. Management of *Mycoplasma genitalium* infections - can we hit a moving target? *BMC Infect Dis* 2015;15:343.
- 7 Public Health England. Sexually transmitted infections (STIs): annual data tables, 2006-2015. Public Health England [www.gov.uk/government/statistics/sexually-transmitted-infections-stis-annual-data-tables](http://www.gov.uk/government/statistics/sexually-transmitted-infections-stis-annual-data-tables) (accessed 20 Sep 2016).
- 8 Thorley N, Radcliffe K. The performance and clinical utility of cervical microscopy for the diagnosis of gonorrhoea in women in the era of the NAAT. *Int J STD AIDS* 2015;26:656–60.
- 9 Horner P, Blee K, O’Mahony C, *et al*. 2015 UK National Guideline on the management of non-gonococcal urethritis. *Int J STD AIDS* 2016;27:85–96.
- 10 Herbst de Cortina S, Bristow CC, Joseph Davey D, *et al*. A Systematic Review of Point of Care Testing for *Chlamydia trachomatis*, *Neisseria gonorrhoeae*, and *Trichomonas vaginalis*. *Infect Dis Obstet Gynecol* 2016;4386127.
- 11 Huang W, Gaydos CA, Barnes MR, *et al*. Comparative effectiveness of a rapid point-of-care test for detection of *Chlamydia trachomatis* among women in a clinical setting. *Sex Transm* 2013;89:108–14.
- 12 Atlas Genetics. Atlas Genetics wins SBRI grant from Innovate UK. 2016. <http://atlasgenetics.com/130-atlas-genetics-wins-sbri-grant-from-innovate-uk>
- 13 Harding-Esch, EM, Fuller, SS, Chow, C, *et al*. Performance of a prototype chlamydia and gonorrhoea recombinase polymerase amplification point-of-care test in three sexual health clinics. In: *Eighth Meeting of the European Society for Chlamydia Research*. Oxford, UK: 2016. [www.escr2016.co.uk/programme.pdf](http://www.escr2016.co.uk/programme.pdf) (accessed 4 Jan 2017).
- 14 S Tariq Sadiq personal communication. PRECISE preliminary results. 2016.
- 15 PSSRU | Unit Costs of Health and Social Care 2015. [www.pssru.ac.uk/project-pages/unit-costs/2015/](http://www.pssru.ac.uk/project-pages/unit-costs/2015/) (accessed 29 Sep 2016).



- 1  
2  
3 16 Aghaizu A, Adams EJ, Turner K, *et al.* What is the cost of pelvic inflammatory disease and how  
4 much could be prevented by screening for *Chlamydia trachomatis*? Cost analysis of the Prevention  
5 of Pelvic Infection (POPI) trial. *Sex Trans* 2011;87:312–7.  
6  
7 17 Adams EJ, Ehrlich A, Turner KME, *et al.* Mapping patient pathways and estimating resource use for  
8 point of care versus standard testing and treatment of chlamydia and gonorrhoea in genitourinary  
9 medicine clinics in the UK. *BMJ Open* 2014;4.  
10  
11 18 Monitor. 2016/17 National Tariff Payment System: draft prices. 2016.  
12 [www.gov.uk/government/publications/201617-national-tariff-payment-system-draft-prices](http://www.gov.uk/government/publications/201617-national-tariff-payment-system-draft-prices)  
13 (accessed 21 Jun 2016).  
14  
15 19 Briggs AH, Weinstein MC, Fenwick EA, *et al.* Model parameter estimation and uncertainty analysis  
16 a report of the ISPOR-SMDM Modelling Good Research Practices Task Force Working Group–6.  
17 *Med Decis Making* 2012;32:722–32.  
18  
19 20 National Institute for Health and Care Excellence. Judging whether public health interventions  
20 offer value for money. 2013. [www.nice.org.uk/advice/lgb10/chapter/judging-the-cost-](http://www.nice.org.uk/advice/lgb10/chapter/judging-the-cost-effectiveness-of-public-health-activities)  
21 [effectiveness-of-public-health-activities](http://www.nice.org.uk/advice/lgb10/chapter/judging-the-cost-effectiveness-of-public-health-activities) (accessed 31 Oct 2017).  
22  
23 21 Getman D, Jiang A, O'Donnell M, *et al.* Mycoplasma genitalium Prevalence, Coinfection, and  
24 Macrolide Antibiotic Resistance Frequency in a Multicenter Clinical Study Cohort in the United  
25 States. *J Clin Microbiol* 2016;54:2278–83.  
26  
27 22 Alcaide ML, Feaster DJ, Duan R, *et al.* The incidence of Trichomonas vaginalis infection in women  
28 attending nine sexually transmitted diseases clinics in the USA. *Sex Transm Infect* 2016;92:58–62.  
29  
30 23 Nwokolo NC, Dragovic B, Patel S, *et al.* 2015 UK national guideline for the management of  
31 infection with Chlamydia trachomatis. *Int J STD AIDS* 2016;27:251–67.  
32  
33 24 Davies B, Turner KME, Frølund M, *et al.* Risk of reproductive complications following chlamydia  
34 testing: a population-based retrospective cohort study in Denmark. *Lancet Infect Dis* Published  
35 Online First: 8 June 2016.  
36  
37 25 Sri T, Southgate E, Kerry SR, *et al.* Health-related quality of life and Chlamydia trachomatis  
38 infection in sexually experienced female inner-city students: a community-based cross-sectional  
39 study. *Int J STD AIDS* Published Online First: 6 May 2016.  
40  
41 26 Smith R, Coast J. The true cost of antimicrobial resistance. *BMJ* 2013;346:f1493.  
42  
43  
44  
45  
46  
47  
48  
49  
50  
51  
52  
53  
54  
55  
56  
57  
58  
59  
60

Table 1. Epidemiological and clinical parameters

| Variable                                      | Value |       |       | Distribution | Number                                                                   |         |         | Comments, Reference                                              |
|-----------------------------------------------|-------|-------|-------|--------------|--------------------------------------------------------------------------|---------|---------|------------------------------------------------------------------|
|                                               | Women | MSW   | MSM   |              | Women                                                                    | MSW     | MSM     |                                                                  |
| 1 Initial clinic attendances                  | 61%   | 27%   | 12%   | Beta         | 590,787                                                                  | 259,064 | 116,137 | Clinician survey results                                         |
| 2 CT infection                                | 6.5%  | 23.3% | 6.2%  | Beta         | 38,401                                                                   | 60,362  | 7,200   | W <sup>14,27,28</sup> ; MSW <sup>14,29</sup> ; MSM <sup>14</sup> |
| 3 NG infection                                | 0.7%  | 3.4%  | 38.1% | Beta         | 4,136                                                                    | 8,808   | 44,248  | W <sup>14,27,28</sup> ; MSW <sup>14,29</sup> ; MSM <sup>14</sup> |
| 4 MG infection                                | 4.2%  | 12.3% | 9.3%  | Beta         | 24,813                                                                   | 31,865  | 10,801  | W <sup>14</sup> ; MSW <sup>14,29</sup> ; MSM <sup>14</sup>       |
| 5 TV infection                                | 4.4%  | 0.0%  | 0.0%  | Beta         | 25,995                                                                   | -       | -       | W <sup>14,27,28,30</sup> ; MSW <sup>14</sup> ; MSM estimate      |
| 6 CT NG co-infection                          | 0.3%  | 2.2%  | 6.2%  | Beta         | 1,772                                                                    | 5,699   | 7,200   | W <sup>14,27</sup> ; MSW, MSM <sup>14</sup>                      |
| 7 CT MG co-infection                          | 1.6%  | 2.8%  | 0.0%  | Beta         | 9,453                                                                    | 7,254   | -       | W, MSW, MSM <sup>14</sup>                                        |
| 8 CT TV co-infection                          | 0.2%  | 0.0%  | 0.0%  | Beta         | 1,182                                                                    | -       | -       | W <sup>14,27,28</sup> ; MSW <sup>14</sup> ; MSM estimate         |
| 9 NG MG co-infection                          | 0.6%  | 0.6%  | 1.0%  | Beta         | 3,545                                                                    | 1,554   | 1,161   | W, MSW, MSM <sup>14</sup>                                        |
| 10 NG TV co-infection                         | 0.4%  | 0.0%  | 0.0%  | Beta         | 2,363                                                                    | -       | -       | W <sup>28</sup> ; MSW <sup>14</sup> ; MSM estimate               |
| 11 MG TV co-infection                         | 1.0%  | 0.0%  | 0.0%  | Beta         | 5,908                                                                    | -       | -       | W <sup>14</sup> ; MSW, MSM estimate                              |
| 12 Sensitivity of microscopy for detecting NG | 40%   | 75%   | 75%   | Uniform      | Estimate based on published studies and clinical experience <sup>8</sup> |         |         |                                                                  |
| 13 Specificity of microscopy for detecting NG | 100%  | 100%  | 100%  | Uniform      | Estimate based on published studies and clinical experience <sup>8</sup> |         |         |                                                                  |
| 14 Sensitivity of microscopy for detecting TV | 50%   | 50%   | 50%   | Uniform      | Assumption based on clinical experience                                  |         |         |                                                                  |
| 15 Specificity of microscopy for detecting TV | 100%  | 100%  | 100%  | Uniform      | Assumption based on clinical experience                                  |         |         |                                                                  |
| 16 Sensitivity of current NAAT test for CT-NG | 97%   | 97%   | 97%   | Uniform      | Typical of best-performing tests currently used <sup>23</sup>            |         |         |                                                                  |
| 17 Specificity of current NAAT test for CT-NG | 97%   | 97%   | 97%   | Uniform      | Typical of best-performing tests currently used <sup>23</sup>            |         |         |                                                                  |
| 18 Sensitivity of POCTs for CT/NG/MG/TV       | 95%   | 95%   | 95%   | Uniform      | Estimate based on tests currently available <sup>10</sup>                |         |         |                                                                  |
| 19 Specificity of POCTs for CT/TV/MG          | 96%   | 96%   | 96%   | Uniform      | Estimate based on tests currently available <sup>10</sup>                |         |         |                                                                  |
| 20 Specificity of POCTs for NG                | 98%   | 98%   | 98%   | Uniform      | Estimate based on tests currently available <sup>10</sup>                |         |         |                                                                  |
| 21 CT infection - probability of PID          | 16%   | -     | -     | Normal       | Estimate based on published studies <sup>2</sup>                         |         |         |                                                                  |
| 22 NG infection - probability of PID          | 16%   | -     | -     | Normal       | Estimate based on published studies <sup>31</sup>                        |         |         |                                                                  |
| 23 MG infection - probability of PID          | 4%    | -     | -     | Normal       | Estimate based on published studies <sup>1</sup>                         |         |         |                                                                  |
| 24 TV infection - probability of PID          | 0%    | -     | -     | Normal       | Assumption                                                               |         |         |                                                                  |
| 25 Microscopy at first attendance             | 84%   | 84%   | 84%   | Uniform      | Assumption, clinician survey results                                     |         |         |                                                                  |
| 26 Presumptive treatment for CT               | 50%   | 50%   | 50%   | Normal       | Estimate based on clinical practice                                      |         |         |                                                                  |
| 27 Proportion of MG infections cured by CT    | 67%   | 67%   | 67%   | Uniform      | Estimate based on published studies <sup>9</sup>                         |         |         |                                                                  |

1  
2  
3  
4  
5 treatment

---

6  
7 CT, *Chlamydia trachomatis*; MG, *Mycoplasma genitalium*; MSM, men-who-have-sex-with-men; MSW, men-who-have-sex-with women; NAAT, nucleic acid  
8 amplification test; NG, *Neisseria gonorrhoea*; NGU, non-gonococcal urethritis; PID, pelvic inflammatory disease; POCT, point-of-care test; TV, *Trichomonas*  
9 *vaginalis*.

10  
11  
12  
13  
14  
15  
16  
17  
18  
19  
20  
21  
22  
23  
24  
25  
26  
27  
28  
29  
30  
31  
32  
33  
34  
35  
36  
37  
38  
39  
40  
41  
42  
43  
44  
45  
46  
47

For peer review only

Table 2. Model input parameters: costs and utilities

| Utilities                                                                               |         |                                                                                                       |  |                             |
|-----------------------------------------------------------------------------------------|---------|-------------------------------------------------------------------------------------------------------|--|-----------------------------|
| Asymptomatic health state                                                               | 1.00    | Assume an otherwise healthy population                                                                |  |                             |
| Symptomatic health state                                                                | 0.93    |                                                                                                       |  | Sri, 2016 <sup>25</sup>     |
| Waiting for diagnosis (symptomatic) health state                                        | 0.93    | Assume the same as symptomatic                                                                        |  | Sri, 2016 <sup>25</sup>     |
| Treatment complete i.e. returned to asymptomatic state                                  | 1.00    | Assume they return to asymptomatic                                                                    |  |                             |
| PID diagnosis health state                                                              | 0.80    |                                                                                                       |  | Smith, 2008 <sup>32</sup>   |
| Costs                                                                                   |         |                                                                                                       |  |                             |
| Tariff cost of initial visit plus treatment management                                  | £141.00 | Draft National Tariff Payment System: 2015/16                                                         |  | <sup>18</sup>               |
| Initial clinic visit of symptomatic patient (micro-costing)                             | £103.71 | Patient pathway adapted from a previous model                                                         |  | Adams, 2014 <sup>a 17</sup> |
| Management of STI (oral medication) on same day as assessment <sup>b,c</sup>            | £29.19  | Excludes drug cost                                                                                    |  | Adams, 2014 <sup>a 17</sup> |
| Management of STI (oral medication) at return visit after results <sup>b,c</sup>        | £31.32  | Excludes drug cost                                                                                    |  | Adams, 2014 <sup>a 17</sup> |
| Management of STI (medication via injection) on same day as assessment <sup>c</sup>     | £43.79  | Excludes drug cost                                                                                    |  | Adams, 2014 <sup>a 17</sup> |
| Management of STI (medication via injection) on return visit after results <sup>c</sup> | £44.32  | Excludes drug cost and GC culture/typing lab processing                                               |  | Adams, 2014 <sup>a 17</sup> |
| Standard CT/NG NAAT laboratory diagnostic test <sup>d</sup>                             | £13.17  |                                                                                                       |  | Adams, 2014 <sup>a 17</sup> |
| POCT CT-NG <sup>d</sup>                                                                 | £24.00  | Assumption based on cost of products currently available                                              |  |                             |
| POCT CT-NG-MG <sup>d</sup>                                                              | £29.00  | Assumption based on cost of products currently available                                              |  |                             |
| POCT CT-NG-MG-TV <sup>d</sup>                                                           | £34.00  | Assumption based on cost of products currently available                                              |  |                             |
| Tariff cost of return visit                                                             | £110.00 | Draft National Tariff Payment System: 2015/16                                                         |  | <sup>18</sup>               |
| Return clinic visit of symptomatic patient (micro-costing)                              | £83.25  | Patient pathway adapted from a previous model                                                         |  | Adams, 2014 <sup>a 17</sup> |
| NG test of cure using standard NAAT laboratory test                                     | £41.73  |                                                                                                       |  | Adams, 2014 <sup>a 17</sup> |
| NG test of cure using POC A                                                             | £55.93  |                                                                                                       |  | Adams, 2014 <sup>a 17</sup> |
| Cost of drug treatment (1 <sup>st</sup> line) for CT                                    | £1.20   | Where 95% of patients receive 1g Azithromycin and 5% receive Doxycycline 100mg twice daily for 7 days |  | BNF, 2016 <sup>33</sup>     |
| Cost of drug treatment (1 <sup>st</sup> line) for NG                                    | £5.95   | Single dose Ceftriaxone 500mg deep intramuscular injection                                            |  | BNF, 2016 <sup>33</sup>     |

1  
2  
3  
4  
5  
6  
7  
8  
9  
10  
11  
12  
13  
14  
15  
16  
17  
18  
19  
20  
21  
22  
23  
24  
25  
26  
27  
28  
29  
30  
31  
32  
33  
34  
35  
36  
37  
38  
39  
40  
41  
42  
43  
44  
45  
46  
47

|                                                      |         |                                                                              |                             |
|------------------------------------------------------|---------|------------------------------------------------------------------------------|-----------------------------|
| Cost of drug treatment (1 <sup>st</sup> line) for MG | £1.87   | with single dose 1g Azithromycin<br>Doxycycline 100mg twice daily for 7 days | BNF, 2016 <sup>33</sup>     |
| Cost of drug treatment (1 <sup>st</sup> line) for TV | £0.36   | Metronidazole 2g orally in a single dose                                     | BNF, 2016 <sup>33</sup>     |
| Cost associated with treatment of short-term PID     | £180.52 |                                                                              | Aghaizu, 2011 <sup>16</sup> |

BNF, British National Formulary; CT, *Chlamydia trachomatis*; MG, *Mycoplasma genitalium*; NAAT, nucleic acid amplification test; NG, *Neisseria gonorrhoea*; PID, pelvic inflammatory disease; POC, point-of-care; TV, *Trichomonas vaginalis*.

<sup>a</sup>Costs were inflated to 2015/16 costs using the Hospital and Community Health Services (HCHS) Inflation Indices 2015 produced by the Personal Social Services Research Unit.<sup>15</sup> No data were available for inflation from 2014/15 to 2015/16 so it was assumed to be the same as between 2013/2014 and 2014/15. The UK consumer price index for health services shows similar annual growth in this sector from 2014 which validates this assumption.

<sup>b</sup>The cost of management of MG/TV infection is assumed to be the same as the costs associated with management of CT infection.

<sup>c</sup>These costs vary due to the difference in administrative staff time for patient registration if the patient is treated on the same day or on a subsequent visit.

<sup>d</sup>MSM have samples from three sites (urethral, rectal, pharyngeal) tested at the initial visit, whereas women and MSW typically have one sample taken.

For peer review only

Table 3. The costs, QALYs, average time to cure, inappropriate treatment and follow-up visits in SC and three POC strategies for symptomatic people attending GUM services

| Sub-group | Strategy | Model Outcomes              |                      |             |                             |                          |                              |                                   |                   |                    |
|-----------|----------|-----------------------------|----------------------|-------------|-----------------------------|--------------------------|------------------------------|-----------------------------------|-------------------|--------------------|
|           |          | Total costs (micro-costing) | Total costs (tariff) | Total QALYs | Average time to cure (days) | Inappropriate treatments | Mean number of visits/person | Return clinic visits <sup>1</sup> | Infected partners | PID cases in women |
| All       | SC       | £113,058,655                | £172,364,138         | 146,532     | 4.3                         | 258,395                  | 1.3                          | 328,726                           | 1,876             | 176                |
|           | POC A    | £118,704,963                | £151,956,910         | 146,656     | 2.3                         | 109,135                  | 1.1                          | 143,205                           | 1,414             | 119                |
|           | POC B    | £124,842,003                | £152,288,107         | 146,626     | 2.1                         | 200,865                  | 1.2                          | 146,216                           | 1,451             | 64                 |
|           | POC C    | £125,313,136                | £145,912,757         | 146,867     | 1.1                         | 23,260                   | 1.1                          | 88,259                            | 1,068             | 64                 |
| Women     | SC       | £65,122,097                 | £99,714,696          | 89,533      | 4.4                         | 176,604                  | 1.3                          | 149,216                           | 764               | 176                |
|           | POC A    | £66,938,018                 | £88,960,028          | 89,584      | 2.4                         | 76,322                   | 1.1                          | 51,446                            | 524               | 119                |
|           | POC B    | £69,853,645                 | £89,101,615          | 89,554      | 2.2                         | 128,806                  | 1.1                          | 52,733                            | 535               | 64                 |
|           | POC C    | £69,285,504                 | £85,008,982          | 89,718      | 1.1                         | 1,607                    | 1.0                          | 15,528                            | 260               | 64                 |
| MSW       | SC       | £29,572,989                 | £46,813,874          | 39,342      | 4.3                         | 54,860                   | 1.4                          | 93,507                            | 459               | -                  |
|           | POC A    | £29,995,704                 | £40,111,202          | 39,389      | 2.1                         | 20,957                   | 1.1                          | 32,574                            | 343               | -                  |
|           | POC B    | £31,717,478                 | £40,614,444          | 39,380      | 2.0                         | 54,863                   | 1.1                          | 37,149                            | 360               | -                  |
|           | POC C    | £31,373,674                 | £38,724,875          | 39,443      | 1.2                         | 13,218                   | 1.1                          | 19,971                            | 285               | -                  |
| MSM       | SC       | £18,363,569                 | £25,835,568          | 17,658      | 4.1                         | 26,931                   | 1.7                          | 86,002                            | 653               | -                  |
|           | POC A    | £21,771,241                 | £22,885,680          | 17,684      | 2.3                         | 11,855                   | 1.5                          | 59,185                            | 546               | -                  |
|           | POC B    | £23,270,880                 | £22,572,047          | 17,692      | 1.5                         | 17,196                   | 1.5                          | 56,334                            | 556               | -                  |
|           | POC C    | £24,653,958                 | £22,178,900          | 17,706      | 1.2                         | 8,436                    | 1.5                          | 52,760                            | 524               | -                  |

<sup>1</sup>Return clinic visit for results and treatment, a test of cure (routine for NG) or because they remain symptomatic.

MSW, men-who-have-sex-with-women; MSM, men-who-have-sex-with-men; POC, point-of-care; PID, pelvic inflammatory disease; QALY, quality-adjusted life year.

Table 4. Cost differences for SC and POC strategies

| Sub-group | Comparison  | QALY difference | Micro-costing   |                      | Tariff costs    |                      |
|-----------|-------------|-----------------|-----------------|----------------------|-----------------|----------------------|
|           |             |                 | Cost difference | ICER (£/QALY gained) | Cost difference | ICER (£/QALY gained) |
| All       | POC A vs SC | 124             | £5,646,309      | £45,516              | -£20,407,228    | <b>Cost-Saving</b>   |
|           | POC B vs SC | 94              | £11,783,348     | £125,197             | -£20,076,031    | <b>Cost-Saving</b>   |
|           | POC C vs SC | 335             | £12,254,482     | £36,585              | -£26,451,382    | <b>Cost-Saving</b>   |
|           | POC B vs A  | -30             | £6,137,039      | <b>Dominated</b>     | £331,197        | <b>Dominated</b>     |
|           | POC C vs B  | 241             | £471,133        | £1,956               | -£6,375,350     | <b>Cost-Saving</b>   |
| Women     | POC A vs SC | 51              | £1,815,921      | £35,608              | -£10,754,668    | <b>Cost-Saving</b>   |
|           | POC B vs SC | 21              | £4,731,548      | £222,568             | -£10,613,081    | <b>Cost-Saving</b>   |
|           | POC C vs SC | 185             | £4,163,407      | £22,448              | -£14,705,715    | <b>Cost-Saving</b>   |
|           | POC B vs A  | -30             | £2,915,627      | <b>Dominated</b>     | £141,587        | <b>Dominated</b>     |
|           | POC C vs B  | 164             | -£568,141       | <b>Cost-Saving</b>   | -£4,092,634     | <b>Cost-Saving</b>   |
| MSW       | POC A vs SC | 47              | £422,715        | £9,005               | -£6,702,672     | <b>Cost-Saving</b>   |
|           | POC B vs SC | 38              | £2,144,488      | £56,104              | -£6,199,430     | <b>Cost-Saving</b>   |
|           | POC C vs SC | 102             | £1,800,685      | £17,724              | -£8,088,999     | <b>Cost-Saving</b>   |
|           | POC B vs A  | -9              | £1,721,773      | <b>Dominated</b>     | £503,242        | <b>Dominated</b>     |
|           | POC C vs B  | 63              | -£343,804       | <b>Cost-Saving</b>   | -£1,889,570     | <b>Cost-Saving</b>   |
| MSM       | POC A vs SC | 26              | £3,407,672      | £130,508             | -£2,949,888     | <b>Cost-Saving</b>   |
|           | POC B vs SC | 35              | £4,907,312      | £141,683             | -£3,263,521     | <b>Cost-Saving</b>   |
|           | POC C vs SC | 48              | £6,290,390      | £131,319             | -£3,656,668     | <b>Cost-Saving</b>   |
|           | POC B vs A  | 9               | £1,499,639      | £175,909             | -£313,633       | <b>Cost-Saving</b>   |
|           | POC C vs B  | 13              | £1,383,078      | £104,258             | -£393,147       | <b>Cost-Saving</b>   |

ICER, incremental cost-effectiveness ratios; MSW, men-who-have-sex-with-women; MSM, men-who-have-sex-with-men; POC, point-of-care; QALY, quality-adjusted life year.

Figure 1. Diagram showing simplified patient flow through the model

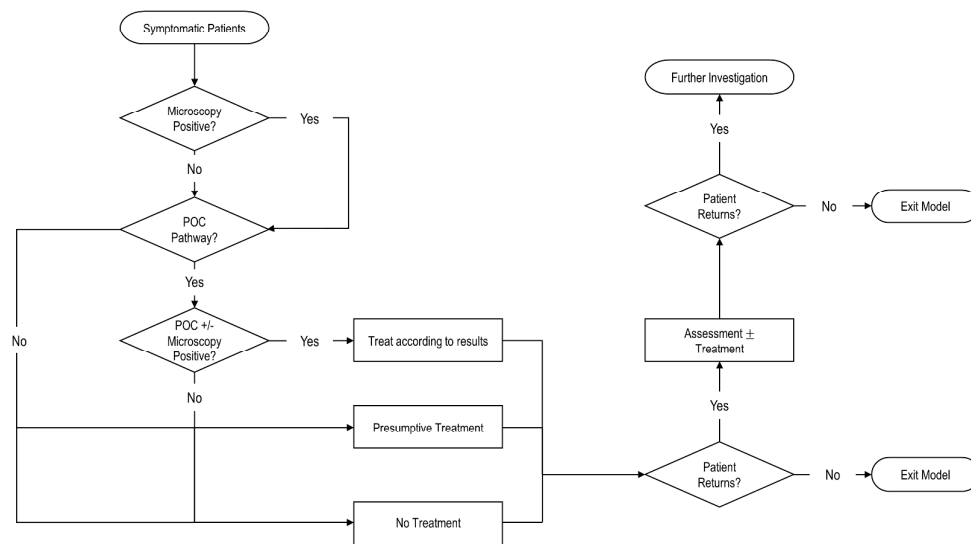

**Standard care (SC):** 50% of people not diagnosed with NG or TV by microscopy will be presumptively treated for CT. The treatment is effective against CT, 67% of MG<sup>9</sup>, and against all other non-specific bacterial STIs (i.e. not CT/NG/MG/TV). We assume this treatment is not effective against TV or NG. Incorrectly treated patients with NG infection will be diagnosed by NAAT, and return (minus those LTFU) to receive treatment. Other returning patients may receive presumptive treatment for MG and TV.

**POC strategy A:** 50% of people not diagnosed by microscopy or POCT would be presumptively treated for MG and TV. We assume that this treatment is effective against CT, MG, TV, and against all other non-specific bacterial STIs. We assume that this treatment is not effective against NG. Patients not initially presumptively treated but who return to the clinic are then presumptively treated with MG and TV treatment.

**POC strategy B:** 50% of people not diagnosed by microscopy or POCT would be presumptively treated for TV. We assume this treatment is effective against TV, and against all other non-specific bacterial STIs. We assume this treatment is not effective against CT, MG, or NG.

**POC strategy C:** 100% of people who are not diagnosed by microscopy or POC would be presumptively treated using azithromycin. We assume this treatment is effective against CT, 67% of MG<sup>9</sup>, and against all other non-specific bacterial STIs. We assume this treatment is not effective against TV or NG. If any treated patients return they will be categorised as 'investigate further'. The



1  
2  
3  
4  
5  
6  
7  
8  
9  
10  
11  
12  
13  
14  
15  
16  
17  
18  
19  
20  
21  
22  
23  
24  
25  
26  
27  
28  
29  
30  
31  
32  
33  
34  
35  
36  
37  
38  
39  
40  
41  
42  
43  
44  
45  
46  
47  
48  
49  
50  
51  
52  
53  
54  
55  
56  
57  
58  
59  
60

cost of the 'investigate further' is the cost of a standard return appointment which includes microscopy.

For peer review only

Figure 2. Cost-effectiveness acceptability curve: point-of-care (POC) strategies vs standard care

a. All

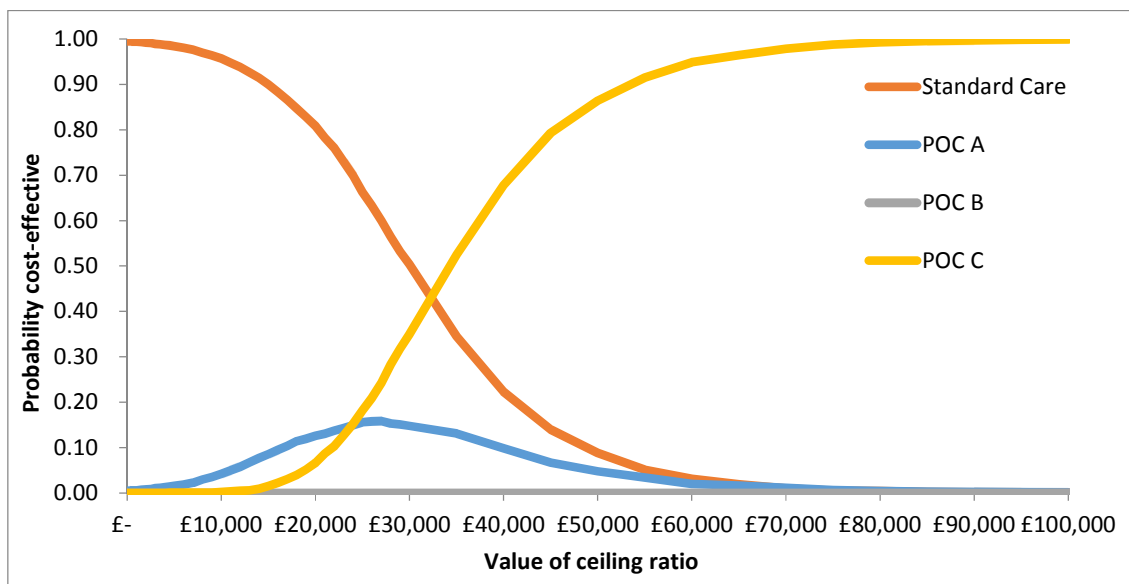

b. Women

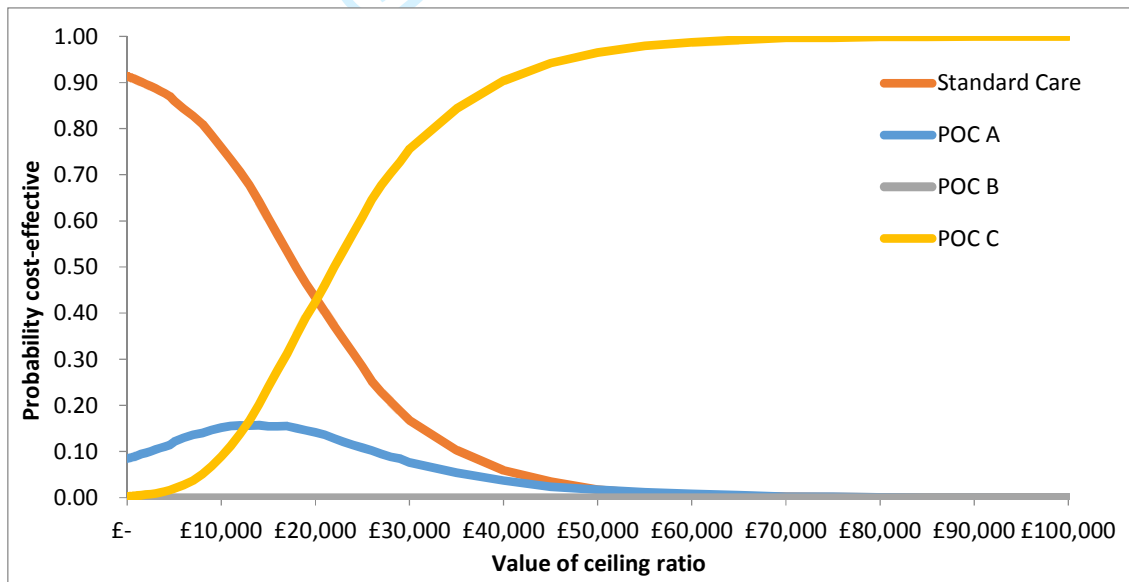

c. Men-who-have-sex-with-women

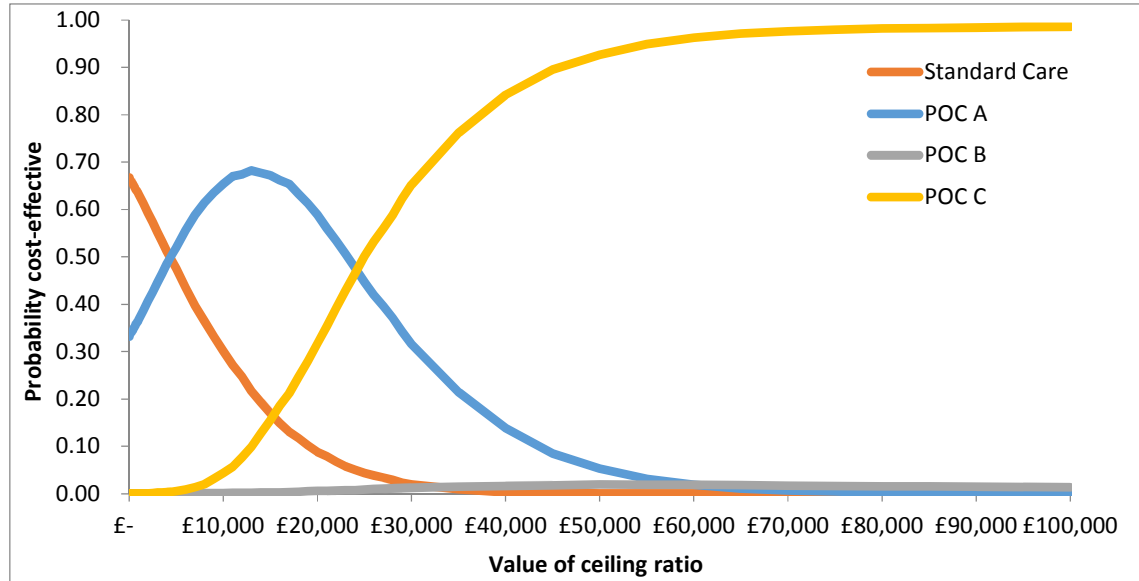

d. Men-who-have-sex-with-men

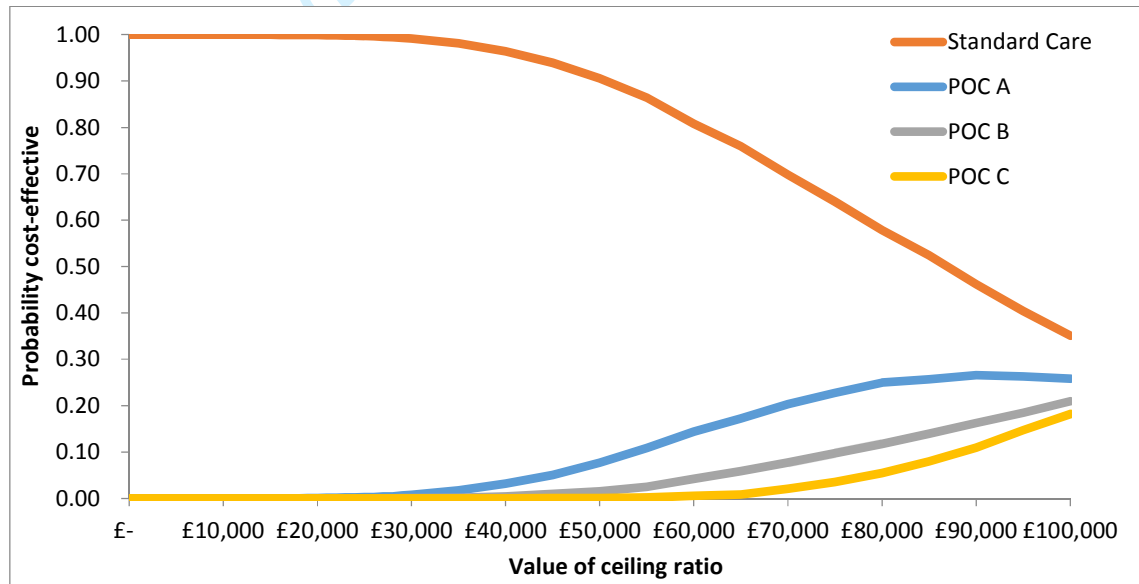

POC, point-of-care strategy

Supplementary Table 1. Key model assumptions

- 1 The decision framework assumes that after a maximum of 3 courses of treatment the individual would be cured. In standard care, this could take up to 56 days in total; therefore, the cycle length is one day and time horizon is 56 days.
- 2 Screening options will confirm diagnosis between 1-21 days; treatment options will last for a maximum of 7 days and 2 weekly cycles are imposed between treatment regimens. In current practice, we assume that individuals return on day 8 for test results in the base-case.
- 3 The sensitivity (true positive) and specificity (true negative) of POCT for each infection does not vary across the different POC strategies nor does it vary between patient sub-groups.
- 4 The model accounts for the impact of single and dual infections (CT, NG, TV and MG).
- 5 The proportion lost-to-follow-up varies by STI and gender due to the nature of symptoms and severity of individual STIs.
- 6 STI symptoms remain at the same clinical level of severity across the time horizon.
- 7 The model incorporates an 'Other Infection' category which includes all other infections that cause similar lower genital symptoms diagnosed initially (day 0) that rule out an initial diagnosis of CT/NG/MG/TV. These may include candida and allergic reactions. The proportion of the cohort who we assume fall into the "Other infection" category is 1 in 2 for women, 1 in 3 for MSW and 1 in 4 for MSM. We vary this assumption in scenario analysis.
- 8 Once results from screening options are confirmed those with a confirmed STI are treated and partners are made aware of the infection to access treatment.
- 9 Each index infection is assumed to have 1 partner for women and MSW and 2 partners for MSM per 7-day period; this assumption, as well as the number of sexual acts per week, is varied in sensitivity analysis.
- 10 In the absence of any data on changes in sexual behaviour following diagnosis with an STI, it is assumed sexual behaviour is not changed due to a diagnosis. This assumption affords the identification of all potential transmissions; however, taken at face value would be an overestimation of transmissions.
- 11 The model assumes STI transmission rates are constant over the duration of exposure.
- 12 The model assumes different treatment regimens for the different infections as informed by clinical guidance.
- 13 The model assumes the correct treatment for true CT/NG/MG/TV infection is 100% efficacious and ignores antibiotic resistant strains in NG and MG, thereby underestimating the total costs associated with STI infection.
- 14 The model does not include re-infections.
- 15 The model does not consider adverse events associated with treatment options.
- 16 The model does not consider long-term complications associated with STI infection.
- 17 The model limits sub-group analysis to women, MSW and MSM; treatment pathways do not vary by sub-group.

CT, *Chlamydia trachomatis*; MG, *Mycoplasma genitalium*; MSM, men-who-have-sex-with-men; MSW, men-who-have-sex-with-women; NG, *Neisseria gonorrhoea*; POCT, point of care test; STI, sexually transmitted infection, TV, *Trichomonas vaginalis*.

Supplementary Table 2. Summary of GUM clinician survey (October 2016) relevant to patient pathways

| Survey question                                                                           | Median | Lowest | Highest |
|-------------------------------------------------------------------------------------------|--------|--------|---------|
| Roughly how many patients attend your service every month?                                | 1,700  | 80     | 6,000   |
| What proportion of your patients are MSM?                                                 | 10%    | 5%     | 100%    |
| What proportion of your patients are MSW?                                                 | 30%    | 0%     | 85%     |
| What proportion of your patients are women?                                               | 53%    | 0%     | 60%     |
| What proportion of MSM attend with a symptomatic lower genital tract infection?           | 50%    | 5%     | 90%     |
| What proportion of MSW attend with a symptomatic lower genital tract infection?           | 40%    | 0%     | 90%     |
| What proportion of women attend with a symptomatic lower genital tract infection?         | 50%    | 0%     | 80%     |
| What proportion of symptomatic men have a swab that is sent for microscopy?               | 80%    | 25%    | 100%    |
| What proportion of symptomatic men have a swab that is sent for culture?                  | 60%    | 5%     | 100%    |
| What proportion of symptomatic women have a swab that is sent for microscopy?             | 88%    | 0%     | 100%    |
| What proportion of symptomatic women have a swab that is sent for culture?                | 58%    | 0%     | 100%    |
| What proportion of MSM are tested for MG?                                                 | 0%     | 0%     | 10%     |
| What proportion of MSW are tested for MG?                                                 | 0%     | 0%     | 20%     |
| What proportion of women are tested for MG?                                               | 0%     | 0%     | 15%     |
| <b>Men who test negative for CT/NG</b>                                                    |        |        |         |
| What proportion return to your service for a follow-up appointment?                       | 50%    | 5%     | 100%    |
| Of those who return, what proportion receive further tests?                               | 25%    | 0%     | 80%     |
| Of those who return, what proportion receive presumptive treatment for another infection? | 18%    | 5%     | 90%     |
| What proportion are referred to / decide to attend another healthcare setting (e.g. GP)?  | 23%    | 0%     | 65%     |
| <b>Women who test negative for CT/NG</b>                                                  |        |        |         |
| What proportion return to your service for a follow-up appointment?                       | 30%    | 0%     | 75%     |
| Of those who return, what proportion receive further tests?                               | 50%    | 10%    | 100%    |
| Of those who return, what proportion receive presumptive treatment for another infection? | 28%    | 5%     | 100%    |
| What proportion are referred to / decide to attend another healthcare setting (e.g. GP)?  | 20%    | 0%     | 85%     |

CT, *Chlamydia trachomatis*; GP, General Practice; GUM, genitourinary medicine; MG, *Mycoplasma genitalium*; MSM, men-who-have-sex-with-men; MSW, men-who-have-sex-with-women; NG, *Neisseria gonorrhoea*; TV, *Trichomonas vaginalis*.

The online survey was completed by 23 GUM clinicians, 10 from London and 13 from elsewhere in the UK.

Supplementary Table 3. Scenarios assessed

|    |                                                                                                                                                           |
|----|-----------------------------------------------------------------------------------------------------------------------------------------------------------|
| 1  | Higher prevalence of MG and TV (double the current estimated prevalence)                                                                                  |
| 2  | Higher prevalence of MG and TV based on estimated prevalence in symptomatic patients in the US (MG: women 21.1%; men 19.3% and TV: women 25.9%; men 6.3%) |
| 3  | Increase proportion with 'Other infection' as follows: women: 66.6%, MSW: 50%, MSM: 50%                                                                   |
| 4  | Decrease proportion with 'Other infection' as follows: women: 33.3%, MSW: 25%, MSM: 20%                                                                   |
| 5  | 100% increase the rate of LTFU                                                                                                                            |
| 6  | 50% decrease the rate of LTFU                                                                                                                             |
| 7  | Specificity/sensitivity of POCT is 75%                                                                                                                    |
| 8  | Specificity/sensitivity of POCT is 80%                                                                                                                    |
| 9  | Specificity/sensitivity of POCT is 85%                                                                                                                    |
| 10 | Specificity/sensitivity of POCT is 85% for NG (but unaltered for CT, MG and TV)                                                                           |
| 11 | Specificity/sensitivity of POCT is 85% for CT (but unaltered for NG, MG and TV)                                                                           |
| 12 | Specificity/sensitivity of POCT is 85% for MG (but unaltered for CT, NG and TV)                                                                           |
| 13 | No microscopy used in any testing strategy                                                                                                                |
| 14 | 50% people get microscopy                                                                                                                                 |
| 15 | 75% people get microscopy                                                                                                                                 |
| 16 | 100% people get microscopy                                                                                                                                |
| 17 | 84% use of microscopy in current pathway and no use of microscopy in the POC strategy C                                                                   |
| 18 | No microscopy for men (only) in POC strategy C                                                                                                            |
| 19 | No microscopy for women (only) in POC strategy C                                                                                                          |
| 20 | Use of microscopy in POC strategy C only after a negative test result                                                                                     |
| 21 | No presumptive treatment for CT                                                                                                                           |
| 22 | 25% presumptive treatment for CT (of those not diagnosed with NG/TV in microscopy)                                                                        |
| 23 | 75% presumptive treatment for CT (of those not diagnosed with NG/TV in microscopy)                                                                        |
| 24 | 100% presumptive treatment for CT (of those not diagnosed with NG/TV in microscopy)                                                                       |
| 25 | Use 10% reduction in symptomatic utility scores                                                                                                           |
| 26 | Excluding the cost of PID (as not all PID will be treated in the GUM service)                                                                             |
| 27 | Inclusion of the drug costs for doxycycline as treatment for anyone NG/CT/MG/TV negative                                                                  |
| 28 | POCT CT-NG costs the same as laboratory based NAAT                                                                                                        |
| 29 | POCT CT-NG-MG cost the same as laboratory based NAAT                                                                                                      |
| 30 | POCT CT-NG-MG-TV costs the same as laboratory based NAAT                                                                                                  |
| 31 | All POCTs cost the same as laboratory based NAAT                                                                                                          |
| 32 | All POCTs cost £2 less than in base-case                                                                                                                  |

CT, *Chlamydia trachomatis*; GUM, genitourinary medicine; LTFU, lost-to-follow-up; MG, *Mycoplasma genitalium*; MSM, men-who-have-sex-with-men; MSW, men-who-have-sex-with-women; NAAT, nucleic acid amplification test; NG, *Neisseria gonorrhoea*; POC, point-of-care; POCT, point-of-care test; TV, *Trichomonas vaginalis*; US, United States (of America).

Supplementary Table 4. Cost-effectiveness comparison for scenario analyses using micro-costings - All

| Scenario | Cost-effectiveness comparison (£/QALY gained) |             |             |                |                |
|----------|-----------------------------------------------|-------------|-------------|----------------|----------------|
|          | POC A vs SC                                   | POC B vs SC | POC C vs SC | POC B vs POC A | POC C vs POC B |
| 1        | Dominated                                     | £ 17,389    | £ 41,381    | £7,153         | Dominated      |
| 2        | Dominated                                     | £ 20,530    | £ 56,548    | £8,228         | Dominated      |
| 3        | £ 224,378                                     | £ 22,979    | £ 69,517    | £12,300        | Dominated      |
| 4        | Dominated                                     | £ 15,818    | £ 24,163    | £7,107         | £6,353         |
| 5        | Dominated                                     | £ 19,691    | £ 35,749    | £9,196         | Dominated      |
| 6        | Dominated                                     | £ 19,363    | £ 36,221    | £9,196         | Dominated      |
| 7        | Dominated                                     | £ 21,665    | £ 82,996    | £8,870         | Dominated      |
| 8        | Dominated                                     | £ 21,220    | £ 69,561    | £8,865         | Dominated      |
| 9        | Dominated                                     | £ 20,735    | £ 57,596    | £8,891         | Dominated      |
| 10       | Dominated                                     | £ 19,726    | £ 39,414    | £8,986         | Dominated      |
| 11       | Dominated                                     | £ 20,431    | £ 43,314    | £8,265         | Dominated      |
| 12       | Dominated                                     | £ 19,647    | £ 40,917    | £10,034        | Dominated      |
| 13       | Dominated                                     | £ 16,204    | £ 29,594    | £8,703         | Dominated      |
| 14       | Dominated                                     | £ 18,061    | £ 33,245    | £8,989         | Dominated      |
| 15       | Dominated                                     | £ 19,088    | £ 35,286    | £9,140         | Dominated      |
| 16       | Dominated                                     | £ 20,191    | £ 37,493    | £9,297         | Dominated      |
| 17       | Dominated                                     | £ 19,476    | £ 16,053    | £9,196         | £23,574        |
| 18       | Dominated                                     | £ 19,476    | £ 28,889    | £9,196         | £7,998         |
| 19       | Dominated                                     | £ 19,476    | £ 23,566    | £9,196         | £14,332        |
| 20       | Dominated                                     | £ 19,476    | £ 16,053    | £9,196         | £23,574        |
| 21       | Dominated                                     | £7,339      | £9,092      | £3,792         | £2,859         |
| 22       | Dominated                                     | £ 12,055    | £ 18,039    | £5,910         | £552           |
| 23       | Dominated                                     | £ 32,870    | £ 91,155    | £14,987        | Dominated      |
| 24       | Dominated                                     | £ 64,300    | Dominated   | £27,913        | Dominated      |
| 25       | £ 46,988                                      | £ 17,310    | £ 15,627    | £10,948        | £4,554         |
| 26       | Dominated                                     | £ 19,510    | £ 36,120    | £9,211         | Dominated      |
| 27       | Dominated                                     | £ 19,476    | £ 37,040    | £9,196         | Dominated      |
| 28       | £ 43,475                                      | £ 19,476    | £ 36,060    | £21,718        | Dominated      |
| 29       | Dominated                                     | Cost-saving | £ 36,060    | Cost-saving    | Dominated      |
| 30       | Dominated                                     | £ 19,476    | Cost-saving | £9,196         | £74,924        |
| 31       | £ 43,475                                      | Cost-saving | Cost-saving | £218           | £20,817        |
| 32       | Dominated                                     | £ 16,667    | £ 31,058    | £9,196         | Dominated      |

POCT, point-of-care test strategy; QALY, quality-adjusted life year.

Supplementary Table 5. Cost-effectiveness comparison for scenario analyses using micro-costings - Women

| Women    |             | Cost-effectiveness comparison (£/QALY gained) |             |                |                |
|----------|-------------|-----------------------------------------------|-------------|----------------|----------------|
| Scenario | POC A vs SC | POC B vs SC                                   | POC C vs SC | POC B vs POC A | POC C vs POC B |
| 1        | Dominated   | £8,843                                        | £ 25,961    | £4,199         | Dominated      |
| 2        | Dominated   | £8,932                                        | £ 52,744    | £3,587         | Dominated      |
| 3        | Dominated   | £ 13,611                                      | £ 46,391    | £7,257         | Dominated      |
| 4        | Dominated   | £6,915                                        | £ 10,406    | £3,249         | £5,070         |
| 5        | Dominated   | £9,013                                        | £ 21,182    | £4,368         | £1,662         |
| 6        | Dominated   | £8,827                                        | £ 22,264    | £4,368         | £1,662         |
| 7        | Dominated   | £8,012                                        | £ 48,866    | £3,769         | £180           |
| 8        | Dominated   | £8,124                                        | £ 41,683    | £3,848         | £350           |
| 9        | Dominated   | £8,279                                        | £ 34,918    | £3,954         | £588           |
| 10       | Dominated   | £8,732                                        | £ 22,995    | £4,249         | £1,398         |
| 11       | Dominated   | £8,597                                        | £ 25,567    | £3,827         | £1,542         |
| 12       | Dominated   | £8,630                                        | £ 24,992    | £4,563         | £1,556         |
| 13       | Dominated   | £8,344                                        | £ 19,947    | £4,136         | £2,008         |
| 14       | Dominated   | £8,661                                        | £ 21,070    | £4,271         | £1,808         |
| 15       | Dominated   | £8,829                                        | £ 21,658    | £4,341         | £1,702         |
| 16       | Dominated   | £9,004                                        | £ 22,264    | £4,415         | £1,590         |
| 17       | Dominated   | £8,891                                        | Cost-saving | £4,368         | £14,160        |
| 18       | Dominated   | £8,891                                        | £ 21,874    | £4,368         | £1,662         |
| 19       | Dominated   | £8,891                                        | Cost-saving | £4,368         | £14,160        |
| 20       | Dominated   | £8,891                                        | Cost-saving | £4,368         | £14,160        |
| 21       | Dominated   | £4,042                                        | £1,678      | £1,846         | £6,724         |
| 22       | Dominated   | £6,046                                        | £8,172      | £2,856         | £4,238         |
| 23       | Dominated   | £ 13,250                                      | £ 69,756    | £6,878         | Dominated      |
| 24       | Dominated   | £ 20,769                                      | Dominated   | £11,866        | Dominated      |
| 25       | Dominated   | £9,256                                        | £9,545      | £5,197         | £7,575         |
| 26       | Dominated   | £8,930                                        | £ 21,981    | £4,383         | £1,662         |
| 27       | Dominated   | £8,891                                        | £ 23,150    | £4,368         | £951           |
| 28       | Dominated   | £8,891                                        | £ 21,874    | £6,916         | £1,662         |
| 29       | Dominated   | £ 143                                         | £ 21,874    | Cost-saving    | Dominated      |
| 30       | Dominated   | £8,891                                        | Cost-saving | £4,368         | £23,924        |
| 31       | Dominated   | £ 143                                         | Cost-saving | Cost-saving    | £10,304        |
| 32       | Dominated   | £6,671                                        | £ 15,666    | £4,368         | £1,662         |

POCT, point-of-care test strategy; QALY, quality-adjusted life year.



Supplementary Table 6. Cost-effectiveness comparison for scenario analyses using micro-costings - MSW

| MSW Scenario | Cost-effectiveness comparison (£/QALY gained) |             |             |                |                |
|--------------|-----------------------------------------------|-------------|-------------|----------------|----------------|
|              | POC A vs SC                                   | POC B vs SC | POC C vs SC | POC B vs POC A | POC C vs POC B |
| 1            | £12,263                                       | £22,566     | £21,976     | £39,978        | £20,481        |
| 2            | £6,136                                        | £21,655     | £20,324     | £70,648        | £17,318        |
| 3            | £6,705                                        | £20,051     | £33,219     | £53,907        | £163,024       |
| 4            | £10,163                                       | £104,518    | £12,897     | Dominated      | Cost-saving    |
| 5            | £12,052                                       | £61,168     | £19,205     | Dominated      | Cost-saving    |
| 6            | £7,525                                        | £53,665     | £16,992     | Dominated      | Cost-saving    |
| 7            | £265,801                                      | Dominated   | £64,478     | Dominated      | Cost-saving    |
| 8            | £100,276                                      | Dominated   | £50,420     | Dominated      | Cost-saving    |
| 9            | £49,716                                       | Dominated   | £38,304     | Dominated      | Cost-saving    |
| 10           | £10,139                                       | £60,983     | £19,061     | Dominated      | Cost-saving    |
| 11           | £44,559                                       | £243,310    | £28,123     | Dominated      | Cost-saving    |
| 12           | £9,005                                        | £109,035    | £22,985     | Dominated      | Cost-saving    |
| 13           | £5,013                                        | £44,501     | £15,654     | Dominated      | Cost-saving    |
| 14           | £7,253                                        | £50,948     | £16,857     | Dominated      | Cost-saving    |
| 15           | £8,521                                        | £54,669     | £17,490     | Dominated      | Cost-saving    |
| 16           | £9,906                                        | £58,793     | £18,147     | Dominated      | Cost-saving    |
| 17           | £9,005                                        | £56,104     | Cost-saving | Dominated      | Cost-saving    |
| 18           | £9,005                                        | £56,104     | Cost-saving | Dominated      | Cost-saving    |
| 19           | £9,005                                        | £56,104     | £17,724     | Dominated      | Cost-saving    |
| 20           | £9,005                                        | £56,104     | Cost-saving | Dominated      | Cost-saving    |
| 21           | Cost-saving                                   | Cost-saving | Cost-saving | £20,002        | £929           |
| 22           | Cost-saving                                   | £9,663      | £4,599      | £121,977       | Cost-saving    |
| 23           | £80,063                                       | Dominated   | £62,970     | Dominated      | Cost-saving    |
| 24           | Dominated                                     | Dominated   | Dominated   | Dominated      | Cost-saving    |
| 25           | £3,870                                        | £24,112     | £7,614      | Dominated      | Cost-saving    |
| 26           | £9,005                                        | £56,104     | £17,724     | Dominated      | Cost-saving    |
| 27           | £9,005                                        | £56,104     | £18,456     | Dominated      | Cost-saving    |
| 28           | Cost-saving                                   | £56,104     | £17,724     | Dominated      | Cost-saving    |
| 29           | £9,005                                        | £2,696      | £17,724     | £36,667        | £26,789        |
| 30           | £9,005                                        | £56,104     | Cost-saving | Dominated      | Cost-saving    |
| 31           | Cost-saving                                   | £2,696      | Cost-saving | Dominated      | Cost-saving    |
| 32           | Cost-saving                                   | £42,549     | £12,624     | Dominated      | Cost-saving    |

MSW, Men-who-have-sex-with-women; POCT, point-of-care test strategy; QALY, quality-adjusted life year.

Supplementary Table 7. Cost-effectiveness comparisons for scenario analyses using micro-costings - MSM

| MSM | Cost-effectiveness comparison (£/QALY gained) |             |             |             |                |
|-----|-----------------------------------------------|-------------|-------------|-------------|----------------|
|     | Scenario                                      | POC A vs SC | POC B vs SC | POC C vs SC | POC B vs POC A |
| 1   | £137,378                                      | £95,423     | £139,260    | £49,813     | Dominated      |
| 2   | £119,952                                      | £83,250     | £145,988    | £42,999     | Dominated      |
| 3   | £91,163                                       | £83,961     | £332,964    | £71,307     | Dominated      |
| 4   | £140,882                                      | £160,599    | £115,724    | £235,703    | £52,018        |
| 5   | £135,796                                      | £145,798    | £134,186    | £175,909    | £104,258       |
| 6   | £127,894                                      | £139,636    | £1,044      | £175,909    | £1,317         |
| 7   | £833,775                                      | £2,053,305  | £350,136    | Dominated   | £78,956        |
| 8   | £425,499                                      | £591,462    | £268,835    | £4,264,237  | £84,090        |
| 9   | £271,627                                      | £324,923    | £211,896    | £579,296    | £89,914        |
| 10  | £191,294                                      | £191,613    | £173,306    | £192,369    | £130,727       |
| 11  | £168,341                                      | £173,675    | £143,342    | £187,785    | £85,861        |
| 12  | £130,508                                      | £167,524    | £141,202    | £406,528    | £88,559        |
| 13  | £47,590                                       | £64,826     | £74,079     | £189,798    | £126,208       |
| 14  | £80,744                                       | £98,423     | £101,384    | £181,298    | £112,461       |
| 15  | £113,144                                      | £127,453    | £122,040    | £177,307    | £106,349       |
| 16  | £175,783                                      | £175,089    | £151,216    | £173,474    | £100,673       |
| 17  | £130,508                                      | £141,683    | £131,189    | £175,909    | £83,111        |
| 18  | £130,508                                      | £141,683    | £131,189    | £175,909    | £83,111        |
| 19  | £130,508                                      | £141,683    | £131,319    | £175,909    | £104,258       |
| 20  | £130,508                                      | £141,683    | £131,189    | £175,909    | £83,111        |
| 21  | £60,065                                       | £77,460     | £84,981     | £164,890    | £116,909       |
| 22  | £85,266                                       | £101,948    | £103,897    | £170,152    | £110,577       |
| 23  | £235,470                                      | £217,337    | £174,644    | £182,233    | £97,951        |
| 24  | £747,941                                      | £417,789    | £253,365    | £189,212    | £91,656        |
| 25  | £56,093                                       | £60,884     | £56,420     | £75,544     | £44,773        |
| 26  | £130,508                                      | £141,683    | £131,319    | £175,909    | £104,258       |
| 27  | £130,508                                      | £141,683    | £131,648    | £175,909    | £105,447       |
| 28  | Cost-saving                                   | £141,683    | £131,319    | £869,045    | £104,258       |
| 29  | £130,508                                      | Cost-saving | £131,319    | Cost-saving | £681,008       |
| 30  | £130,508                                      | £141,683    | Cost-saving | £175,909    | Cost-saving    |
| 31  | Cost-saving                                   | Cost-saving | Cost-saving | Cost-saving | Cost-saving    |
| 32  | £130,508                                      | £141,683    | £131,319    | £175,909    | £104,258       |

MSM, Men-who-have-sex-with-men; POCT, point-of-care test strategy; QALY, quality-adjusted life year.

## CHEERS Checklist

### Items to include when reporting economic evaluations of health interventions

The **ISPOR CHEERS Task Force Report**, *Consolidated Health Economic Evaluation Reporting Standards (CHEERS)—Explanation and Elaboration: A Report of the ISPOR Health Economic Evaluations Publication Guidelines Good Reporting Practices Task Force*, provides examples and further discussion of the 24-item CHEERS Checklist and the CHEERS Statement. It may be accessed via the *Value in Health* or via the ISPOR Health Economic Evaluation Publication Guidelines – CHEERS: Good Reporting Practices webpage: <http://www.ispor.org/TaskForces/EconomicPubGuidelines.asp>

| Section/item                    | Item No | Recommendation                                                                                                                                                                             | Reported on page No/line No |
|---------------------------------|---------|--------------------------------------------------------------------------------------------------------------------------------------------------------------------------------------------|-----------------------------|
| <b>Title and abstract</b>       |         |                                                                                                                                                                                            |                             |
| Title                           | 1       | Identify the study as an economic evaluation or use more specific terms such as “cost-effectiveness analysis”, and describe the interventions compared.                                    | P1, L1                      |
| Abstract                        | 2       | Provide a structured summary of objectives, perspective, setting, methods (including study design and inputs), results (including base case and uncertainty analyses), and conclusions.    | P2                          |
| <b>Introduction</b>             |         |                                                                                                                                                                                            |                             |
| Background and objectives       | 3       | Provide an explicit statement of the broader context for the study.<br>Present the study question and its relevance for health policy or practice decisions.                               | P4, L20-30                  |
| <b>Methods</b>                  |         |                                                                                                                                                                                            |                             |
| Target population and subgroups | 4       | Describe characteristics of the base case population and subgroups analysed, including why they were chosen.                                                                               | P5, L3-7                    |
| Setting and location            | 5       | State relevant aspects of the system(s) in which the decision(s) need(s) to be made.                                                                                                       | P5, L6-7                    |
| Study perspective               | 6       | Describe the perspective of the study and relate this to the costs being evaluated.                                                                                                        | P6, L13-21                  |
| Comparators                     | 7       | Describe the interventions or strategies being compared and state why they were chosen.                                                                                                    | P5, L11-14                  |
| Time horizon                    | 8       | State the time horizon(s) over which costs and consequences are being evaluated and say why appropriate.                                                                                   | P5, L26                     |
| Discount rate                   | 9       | Report the choice of discount rate(s) used for costs and outcomes and say why appropriate.                                                                                                 | P25                         |
| Choice of health outcomes       | 10      | Describe what outcomes were used as the measure(s) of benefit in the evaluation and their relevance for the type of analysis performed.                                                    | P6, 24-26<br>P24, Table     |
| Measurement of effectiveness    | 11a     | <i>Single study-based estimates:</i> Describe fully the design features of the single effectiveness study and why the single study was a sufficient source of clinical effectiveness data. | N/A                         |

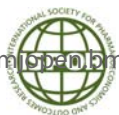

|    |                                                        |     |                                                                                                                                                                                                                                                                                                                                                       |
|----|--------------------------------------------------------|-----|-------------------------------------------------------------------------------------------------------------------------------------------------------------------------------------------------------------------------------------------------------------------------------------------------------------------------------------------------------|
|    |                                                        |     | <u>N/A</u>                                                                                                                                                                                                                                                                                                                                            |
| 1  |                                                        | 11b | <i>Synthesis-based estimates:</i> Describe fully the methods used for identification of included studies and synthesis of clinical effectiveness data.                                                                                                                                                                                                |
| 2  |                                                        |     |                                                                                                                                                                                                                                                                                                                                                       |
| 3  |                                                        |     |                                                                                                                                                                                                                                                                                                                                                       |
| 4  | Measurement and valuation of preference based outcomes | 12  | If applicable, describe the population and methods used to elicit preferences for outcomes.                                                                                                                                                                                                                                                           |
| 5  |                                                        |     |                                                                                                                                                                                                                                                                                                                                                       |
| 6  |                                                        |     | <u>P5-6</u>                                                                                                                                                                                                                                                                                                                                           |
| 7  | Estimating resources and costs                         | 13a | <i>Single study-based economic evaluation:</i> Describe approaches used to estimate resource use associated with the alternative interventions. Describe primary or secondary research methods for valuing each resource item in terms of its unit cost. Describe any adjustments made to approximate to opportunity costs.                           |
| 8  |                                                        |     |                                                                                                                                                                                                                                                                                                                                                       |
| 9  |                                                        |     | <u>N/A</u>                                                                                                                                                                                                                                                                                                                                            |
| 10 |                                                        | 13b | <i>Model-based economic evaluation:</i> Describe approaches and data sources used to estimate resource use associated with model health states. Describe primary or secondary research methods for valuing each resource item in terms of its unit cost. Describe any adjustments made to approximate to opportunity costs.                           |
| 11 |                                                        |     |                                                                                                                                                                                                                                                                                                                                                       |
| 12 |                                                        |     | <u>P24, Table 4</u>                                                                                                                                                                                                                                                                                                                                   |
| 13 | Currency, price date, and conversion                   | 14  | Report the dates of the estimated resource quantities and unit costs. Describe methods for adjusting estimated unit costs to the year of reported costs if necessary. Describe methods for converting costs into a common currency base and the exchange rate.                                                                                        |
| 14 |                                                        |     |                                                                                                                                                                                                                                                                                                                                                       |
| 15 |                                                        |     | <u>P6, L13-26</u>                                                                                                                                                                                                                                                                                                                                     |
| 16 | Choice of model                                        | 15  | Describe and give reasons for the specific type of decision-analytical model used. Providing a figure to show model structure is strongly recommended.                                                                                                                                                                                                |
| 17 |                                                        |     |                                                                                                                                                                                                                                                                                                                                                       |
| 18 |                                                        |     | <u>P24, Table 4</u>                                                                                                                                                                                                                                                                                                                                   |
| 19 | Assumptions                                            | 16  | Describe all structural or other assumptions underpinning the decision-analytical model.                                                                                                                                                                                                                                                              |
| 20 |                                                        |     |                                                                                                                                                                                                                                                                                                                                                       |
| 21 |                                                        |     | <u>P33, Figure 1</u>                                                                                                                                                                                                                                                                                                                                  |
| 22 | Analytical methods                                     | 17  | Describe all analytical methods supporting the evaluation. This could include methods for dealing with skewed, missing, or censored data; extrapolation methods; methods for pooling data; approaches to validate or make adjustments (such as half cycle corrections) to a model; and methods for handling population heterogeneity and uncertainty. |
| 23 |                                                        |     |                                                                                                                                                                                                                                                                                                                                                       |
| 24 |                                                        |     | <u>P20, Table 1</u>                                                                                                                                                                                                                                                                                                                                   |
| 25 |                                                        |     | <u>P7, 14-24</u>                                                                                                                                                                                                                                                                                                                                      |
| 26 |                                                        |     |                                                                                                                                                                                                                                                                                                                                                       |
| 27 |                                                        |     |                                                                                                                                                                                                                                                                                                                                                       |
| 28 | <b>Results</b>                                         |     |                                                                                                                                                                                                                                                                                                                                                       |
| 29 | Study parameters                                       | 18  | Report the values, ranges, references, and, if used, probability distributions for all parameters. Report reasons or sources for distributions used to represent uncertainty where appropriate. Providing a table to show the input values is strongly recommended.                                                                                   |
| 30 |                                                        |     |                                                                                                                                                                                                                                                                                                                                                       |
| 31 |                                                        |     | <u>P21, Table 3</u>                                                                                                                                                                                                                                                                                                                                   |
| 32 | Incremental costs and outcomes                         | 19  | For each intervention, report mean values for the main categories of estimated costs and outcomes of interest, as well as mean differences between the comparator groups. If applicable, report incremental cost-effectiveness ratios.                                                                                                                |
| 33 |                                                        |     |                                                                                                                                                                                                                                                                                                                                                       |
| 34 |                                                        |     | <u>P24, Table 4</u>                                                                                                                                                                                                                                                                                                                                   |
| 35 | Characterising uncertainty                             | 20a | <i>Single study-based economic evaluation:</i> Describe the effects of sampling uncertainty for the estimated incremental cost and incremental effectiveness parameters, together with the impact                                                                                                                                                     |
| 36 |                                                        |     |                                                                                                                                                                                                                                                                                                                                                       |
| 37 |                                                        |     | <u>P28, Table 7</u>                                                                                                                                                                                                                                                                                                                                   |
| 38 |                                                        |     | <u>P27, Table 6</u>                                                                                                                                                                                                                                                                                                                                   |
| 39 |                                                        |     | <u>N/A</u>                                                                                                                                                                                                                                                                                                                                            |
| 40 |                                                        |     |                                                                                                                                                                                                                                                                                                                                                       |
| 41 |                                                        |     |                                                                                                                                                                                                                                                                                                                                                       |
| 42 |                                                        |     |                                                                                                                                                                                                                                                                                                                                                       |
| 43 |                                                        |     |                                                                                                                                                                                                                                                                                                                                                       |
| 44 |                                                        |     |                                                                                                                                                                                                                                                                                                                                                       |
| 45 |                                                        |     |                                                                                                                                                                                                                                                                                                                                                       |
| 46 |                                                        |     |                                                                                                                                                                                                                                                                                                                                                       |
| 47 |                                                        |     |                                                                                                                                                                                                                                                                                                                                                       |
| 48 |                                                        |     |                                                                                                                                                                                                                                                                                                                                                       |
| 49 |                                                        |     |                                                                                                                                                                                                                                                                                                                                                       |
| 50 |                                                        |     |                                                                                                                                                                                                                                                                                                                                                       |
| 51 |                                                        |     |                                                                                                                                                                                                                                                                                                                                                       |
| 52 |                                                        |     |                                                                                                                                                                                                                                                                                                                                                       |
| 53 |                                                        |     |                                                                                                                                                                                                                                                                                                                                                       |
| 54 |                                                        |     |                                                                                                                                                                                                                                                                                                                                                       |
| 55 |                                                        |     |                                                                                                                                                                                                                                                                                                                                                       |
| 56 |                                                        |     |                                                                                                                                                                                                                                                                                                                                                       |
| 57 |                                                        |     |                                                                                                                                                                                                                                                                                                                                                       |
| 58 |                                                        |     |                                                                                                                                                                                                                                                                                                                                                       |
| 59 |                                                        |     |                                                                                                                                                                                                                                                                                                                                                       |
| 60 |                                                        |     |                                                                                                                                                                                                                                                                                                                                                       |

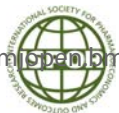

|    |                                                                      |                                                                                                                                                                                                                                                                               |                        |
|----|----------------------------------------------------------------------|-------------------------------------------------------------------------------------------------------------------------------------------------------------------------------------------------------------------------------------------------------------------------------|------------------------|
| 1  |                                                                      | of methodological assumptions (such as discount rate, study perspective).                                                                                                                                                                                                     | N/A                    |
| 2  |                                                                      |                                                                                                                                                                                                                                                                               |                        |
| 3  |                                                                      |                                                                                                                                                                                                                                                                               |                        |
| 4  |                                                                      | 20b <i>Model-based economic evaluation</i> : Describe the effects on the results of uncertainty for all input parameters, and uncertainty related to the structure of the model and assumptions.                                                                              | P30-33                 |
| 5  |                                                                      |                                                                                                                                                                                                                                                                               |                        |
| 6  |                                                                      |                                                                                                                                                                                                                                                                               |                        |
| 7  | Characterising heterogeneity                                         | 21 If applicable, report differences in costs, outcomes, or cost-effectiveness that can be explained by variations between subgroups of patients with different baseline characteristics or other observed variability in effects that are not reducible by more information. | P35 Figure 2<br>P30-33 |
| 8  |                                                                      |                                                                                                                                                                                                                                                                               |                        |
| 9  |                                                                      |                                                                                                                                                                                                                                                                               |                        |
| 10 |                                                                      |                                                                                                                                                                                                                                                                               |                        |
| 11 |                                                                      |                                                                                                                                                                                                                                                                               |                        |
| 12 |                                                                      |                                                                                                                                                                                                                                                                               |                        |
| 13 | <b>Discussion</b>                                                    |                                                                                                                                                                                                                                                                               |                        |
| 14 | Study findings, limitations, generalisability, and current knowledge | 22 Summarise key study findings and describe how they support the conclusions reached. Discuss limitations and the generalisability of the findings and how the findings fit with current knowledge.                                                                          | P10-12                 |
| 15 |                                                                      |                                                                                                                                                                                                                                                                               |                        |
| 16 |                                                                      |                                                                                                                                                                                                                                                                               |                        |
| 17 |                                                                      |                                                                                                                                                                                                                                                                               |                        |
| 18 |                                                                      |                                                                                                                                                                                                                                                                               |                        |
| 19 | <b>Other</b>                                                         |                                                                                                                                                                                                                                                                               |                        |
| 20 | Source of funding                                                    | 23 Describe how the study was funded and the role of the funder in the identification, design, conduct, and reporting of the analysis. Describe other non-monetary sources of support.                                                                                        | P13, L18-21            |
| 21 |                                                                      |                                                                                                                                                                                                                                                                               |                        |
| 22 |                                                                      |                                                                                                                                                                                                                                                                               |                        |
| 23 |                                                                      |                                                                                                                                                                                                                                                                               |                        |
| 24 | Conflicts of interest                                                | 24 Describe any potential for conflict of interest of study contributors in accordance with journal policy. In the absence of a journal policy, we recommend authors comply with International Committee of Medical Journal Editors recommendations.                          | P13, L9-17             |
| 25 |                                                                      |                                                                                                                                                                                                                                                                               |                        |
| 26 |                                                                      |                                                                                                                                                                                                                                                                               |                        |
| 27 |                                                                      |                                                                                                                                                                                                                                                                               |                        |
| 28 |                                                                      |                                                                                                                                                                                                                                                                               |                        |
| 29 |                                                                      |                                                                                                                                                                                                                                                                               |                        |
| 30 |                                                                      |                                                                                                                                                                                                                                                                               |                        |

For consistency, the CHEERS Statement checklist format is based on the format of the CONSORT statement checklist

The **ISPOR CHEERS Task Force Report** provides examples and further discussion of the 24-item CHEERS Checklist and the CHEERS Statement. It may be accessed via the *Value in Health* link or via the ISPOR Health Economic Evaluation Publication Guidelines – CHEERS: Good Reporting Practices webpage: <http://www.ispor.org/TaskForces/EconomicPubGuidelines.asp>

The citation for the CHEERS Task Force Report is:

Husereau D, Drummond M, Petrou S, et al. Consolidated health economic evaluation reporting standards (CHEERS)—Explanation and elaboration: A report of the ISPOR health economic evaluations publication guidelines good reporting practices task force. *Value Health* 2013;16:231-50.



# BMJ Open

## A modelling-based evaluation of the costs, benefits and cost-effectiveness of multi-pathogen point-of-care tests for sexually transmitted infections in symptomatic genitourinary medicine clinic attendees

|                                 |                                                                                                                                                                                                                                                                                                                                                                                                                                                                                                                                                                                                                                                                                                                                                                                              |
|---------------------------------|----------------------------------------------------------------------------------------------------------------------------------------------------------------------------------------------------------------------------------------------------------------------------------------------------------------------------------------------------------------------------------------------------------------------------------------------------------------------------------------------------------------------------------------------------------------------------------------------------------------------------------------------------------------------------------------------------------------------------------------------------------------------------------------------|
| Journal:                        | <i>BMJ Open</i>                                                                                                                                                                                                                                                                                                                                                                                                                                                                                                                                                                                                                                                                                                                                                                              |
| Manuscript ID                   | bmjopen-2017-020394.R1                                                                                                                                                                                                                                                                                                                                                                                                                                                                                                                                                                                                                                                                                                                                                                       |
| Article Type:                   | Research                                                                                                                                                                                                                                                                                                                                                                                                                                                                                                                                                                                                                                                                                                                                                                                     |
| Date Submitted by the Author:   | 07-Feb-2018                                                                                                                                                                                                                                                                                                                                                                                                                                                                                                                                                                                                                                                                                                                                                                                  |
| Complete List of Authors:       | Huntington, Susie; Aquarius Population Health Limited<br>Burns, Richéal; Health Economics and Policy Analysis Centre (HEPAC)<br>Harding- Esch, Emma; Public Health England, HIV/STI Department; St George's Institute for Infection & Immunity, Applied Diagnostic Research and Evaluation Unit<br>Harvey , Michael; Aquarius Population Health Limited<br>Hill-Tout, Rachel; St George's University Hospitals NHS Foundation Trust<br>Fuller, Sebastian; St George's Institute for Infection & Immunity, Applied Diagnostic Research and Evaluation Unit<br>Adams, Elisabeth; Aquarius Population Health Limited<br>Sadiq, S. Tariq; St George's University Hospitals NHS Foundation Trust; St George's Institute for Infection & Immunity, Applied Diagnostic Research and Evaluation Unit |
| <b>Primary Subject Heading</b>: | Sexual health                                                                                                                                                                                                                                                                                                                                                                                                                                                                                                                                                                                                                                                                                                                                                                                |
| Secondary Subject Heading:      | Diagnostics, Health economics, Infectious diseases, Health services research                                                                                                                                                                                                                                                                                                                                                                                                                                                                                                                                                                                                                                                                                                                 |
| Keywords:                       | GENITOURINARY MEDICINE, HEALTH ECONOMICS, Health economics < HEALTH SERVICES ADMINISTRATION & MANAGEMENT, Molecular diagnostics < INFECTIOUS DISEASES, Genitourinary medicine < INTERNAL MEDICINE                                                                                                                                                                                                                                                                                                                                                                                                                                                                                                                                                                                            |
|                                 |                                                                                                                                                                                                                                                                                                                                                                                                                                                                                                                                                                                                                                                                                                                                                                                              |

SCHOLARONE™  
Manuscripts

1  
2  
3 **A modelling-based evaluation of the costs, benefits and cost-effectiveness of multi-pathogen point-**  
4 **of-care tests for sexually transmitted infections in symptomatic genitourinary medicine clinic**  
5 **attendees**  
6  
7  
8  
9

10 Susie E Huntington<sup>1</sup>, Richéal M Burns<sup>1</sup>, Emma Harding-Esch<sup>3,4</sup>, Michael J Harvey<sup>1</sup>, Rachel Hill-Tout<sup>5</sup>,  
11 Sebastian S Fuller<sup>4</sup>, \*Elisabeth J Adams<sup>1</sup>, \*S Tariq Sadiq<sup>3,4,5</sup>  
12  
13

- 14 1. Aquarius Population Health, 58a Highgate High Street, London, N6 5HX, UK  
15 2. Health Economics and Policy Analysis Centre (HEPAC), NUI Galway, Ireland.  
16 3. HIV/STI Department, National Infection Service, Public Health England, 61 Colindale Avenue,  
17 London, NW9 5EQ, UK  
18 4. St George's Institute for Infection and Immunity, Applied Diagnostic Research and Evaluation Unit,  
19 University of London, Cranmer Terrace, London, SW17 0RE, UK  
20 5. St George's University Hospitals NHS Foundation Trust, Blackshaw Road, Tooting, London, SW17  
21 OQT.  
22  
23  
24  
25  
26  
27

28 \*Joint senior authors.  
29

30  
31 Correspondence to: Dr Tariq Sadiq [ssadiq@sgul.ac.uk](mailto:ssadiq@sgul.ac.uk). Tel: 020 8725 5740/3355 Institute for Infection  
32 and Immunity, St George's, University of London, Cranmer Terrace, London, SW17 0RE, UK  
33  
34  
35  
36

37 Word Count: 3095  
38  
39  
40  
41  
42  
43  
44  
45  
46  
47  
48  
49  
50  
51  
52  
53  
54  
55  
56  
57  
58  
59  
60

## Abstract

**Objectives:** To quantify the costs, benefits and cost-effectiveness of three multi-pathogen point-of-care (POC) testing strategies for detecting common sexually transmitted infections (STIs) compared with standard laboratory testing.

**Design:** Modelling study.

**Setting:** Genitourinary medicine (GUM) services in England.

**Population:** A hypothetical cohort of 965,988 people, representing the annual number attending GUM services symptomatic of lower genitourinary tract infection.

**Interventions:** The decision tree model considered costs and reimbursement to GUM services associated with diagnosing and managing STIs. Three strategies using hypothetical point-of-care tests (POCTs) were compared to standard care (SC) using laboratory-based testing. The strategies were: A) dual POC test (POCT) for *Chlamydia trachomatis* (CT) and *Neisseria gonorrhoeae* (NG); B) triplex POCT for CT-NG and *Mycoplasma genitalium* (MG); C) quadruplex POCT for CT-NG-MG and *Trichomonas vaginalis* (TV). Data came from published literature and unpublished estimates.

**Primary and secondary outcome measures:** Primary outcomes were total costs and benefits (quality-adjusted life years [QALYs]) for each strategy (2016 GB £) and associated incremental cost-effectiveness ratios (ICERs) between each of the POC strategies and SC. Secondary outcomes were inappropriate treatment of STIs, onward STI transmission, pelvic inflammatory disease in women, time to cure and total attendances.

**Results:** In the base-case analysis, POC strategy C, a quadruplex POCT, was the most cost-effective relative to the other strategies, with an ICER of £36,585 per QALY gained compared to SC when using micro-costing, and cost-savings of £26,451,382 when using tariff costing. POC strategy C also generated the most benefits, with 240,467 fewer clinic attendances, 808 fewer onward STI transmissions, and 235,135 averted inappropriate treatments compared to SC.

**Conclusions:** Many benefits can be achieved by using multi-pathogen POCTs to improve STI diagnosis and management. Further evidence is needed on the underlying prevalence of STIs and SC delivery in the UK to reduce uncertainty in economic analyses.



1  
2  
3 Strengths and limitations of this study  
4

- 5 • The main strength of this study is that it presents the first estimates of the potential public  
6 health impact of multi-pathogen POCT strategies made possible by emerging diagnostic  
7 technologies.  
8
- 9 • The model used inputs from multiple sources including published studies, published data (for  
10 costs), national surveillance data plus expert opinion and in incorporated uncertainty in  
11 multiple input parameters by using a second order Monte Carlo PSA and numerous scenarios  
12 were assessed in sensitivity analysis.  
13
- 14 • The main limitations were the paucity of published data on treatment pathways including  
15 efficacy of treatment and gaps in treatment guidelines, which made building a representative  
16 SC pathway problematic. There were few published data for some input parameters, for  
17 example, the percentage of patients who are presumptively treated without a microbiological  
18 result, or percentage returning to clinics after initial treatment.  
19  
20  
21  
22  
23  
24  
25  
26  
27  
28  
29  
30  
31  
32  
33  
34  
35  
36  
37  
38  
39  
40  
41  
42  
43  
44  
45  
46  
47  
48  
49  
50  
51  
52  
53  
54  
55  
56  
57  
58  
59  
60

## Introduction

Continued high transmission rates of sexually transmitted infections (STIs) that cause treatable lower genital tract discharge syndromes (GDS) are a major public health concern. This causes significant reproductive-health long-term sequelae<sup>1-4</sup> and frequently necessitates empirical therapy to minimise treatment delay, which often results in misdirected treatment, poor antimicrobial stewardship and the spread of antimicrobial resistance.<sup>5,6</sup> Among the common causes of GDS, there were 107,252 and 39,696 diagnoses of *Chlamydia trachomatis* (CT) and *Neisseria gonorrhoeae* (NG), respectively, made in English genitourinary medicine (GUM) services in 2015<sup>7</sup>, with smaller numbers of *Trichomonas vaginalis* (TV) and *Mycoplasma genitalium* (MG) diagnoses.

The decision to give empirical antimicrobial therapy in symptomatic patients is usually guided by results of immediate microscopy of genital discharge, but this has low sensitivity, missing up to half of NG/TV infections in women<sup>8</sup> and particularly poor specificity for predicting CT or MG. Accurate routine diagnosis, which requires laboratory-based nucleic acid amplification tests (NAATs), can take up to two weeks for results to be processed and most GUM services do not routinely conduct NAATs for MG or TV. Many patients are presumptively treated with either azithromycin or doxycycline, which are effective against CT but respectively cure only two-thirds and one-third of MG infections<sup>9</sup> and neither antimicrobial is effective against TV.<sup>9</sup>

Emerging technologies are being developed that allow rapid and accurate point-of-care tests (POCTs) for multiple sexually transmitted infections, solutions which could address these challenges and help improve patient and public health outcomes. However, health services are under increasing financial pressure, and implementing new technologies may be prohibitively costly for both providers and commissioners of healthcare. There is currently only one commercially available rapid NAAT for CT and NG, which has equivalent performance to laboratory NAATs (Cepheid GeneXpert).<sup>10</sup> Previous economic evaluations of NAAT POCTs for CT and NG indicate that they are likely to provide a cost-effective strategy for screening GUM attendees.<sup>5,11</sup> To inform decision making by groups developing multi-pathogen POCTs and clinics which would likely use such tests, we assessed costs, benefits and cost-effectiveness of three testing strategies using hypothetical NAAT POCTs for A) CT-NG, B) CT-NG-MG and C) CT-NG-MG-TV compared with laboratory-based CT-NG NAAT testing.

## Methods

### Creating a model structure

A decision tree model was constructed using Microsoft Excel (v.2016) to simulate a hypothetical cohort of people with symptoms of a lower genitourinary tract infection attending English GUM services. The base-case or primary analysis, using assumptions provided in Supplementary Table 1, compared complete pathway costs of three point-of-care (POC) strategies to the current practice of using microscopy plus a laboratory CT-NG NAAT. The POC strategies used microscopy plus a hypothetical POCT that provides results in 30 minutes for A) CT-NG; B) CT-NG-MG; C) CT-NG-MG-TV. Microscopy was used in all POC strategies as it can detect other conditions and infections not covered by the POCTs, as well as diagnosing NG and TV. The strategies were chosen in response to recent developments in STI POCT technology, reflecting pathogen configurations and performance characteristics.<sup>12,13</sup>

### Outcomes

Primary outcomes were total costs and benefits, measured by quality adjusted life years (QALYs) for each strategy and associated incremental cost-effectiveness ratios (ICERs, see equation) between each of the POC strategies and standard care (SC). The ICER provides information on the additional cost per unit of additional benefit between an option and the next less expensive alternative.

$$ICER_x = \frac{Cost_{POC_x} - Cost_{Current Practice}}{QALY_{POC_x} - QALY_{Current Practice}}$$

Secondary outcomes assessed the wider health benefits and included inappropriate treatment of STIs (defined as unnecessary treatment of people with no STI plus incorrect treatment for people with an STI), onward transmission of the four STIs, pelvic inflammatory disease (PID), a serious complication of CT, NG and MG infections in women, time to cure and total GUM attendances.

### Patient pathways

Three senior clinicians at St George's University Hospitals NHS Foundation Trust, London outlined current and hypothetical POC pathways for symptomatic patients (Figure 1). We assumed that treatment pathways did not vary by subgroup but that MSM had diagnostic tests from three anatomical sites (genital, pharyngeal, and rectal) at initial visit and MSW and women only had genital swabs. The model accounted for single or dual infections with NG, CT, MG and/or TV.

1  
2  
3 The cost of treating PID, was included in the model but other long-term complications associated with  
4 STI infection (e.g. infertility) and adverse drug events associated with treatment were not considered.  
5  
6 The proportion of patients lost-to-follow-up (LTFU) was estimated. It was assumed that anyone  
7 remaining in follow-up consented to diagnostic testing and, if diagnosed, accepted treatment. The  
8 decision framework assumed that individuals had a maximum of three follow-up visits and then exited  
9 the model. Drug resistance was not considered. The time horizon for the model was 56 days. It was  
10 assumed that treatment was started on the day of diagnosis.  
11  
12  
13  
14

#### 15 Epidemiology and clinical parameters

16  
17 A short online survey, distributed to members of the British Association for Sexual Health and HIV  
18 (BASHH), was used to collect data on the percentage of patients attending GUM services that are  
19 symptomatic, the percentage of patients returning after initial visits, as well as MG testing protocols,  
20 as limited data were available from published literature. The survey was completed by 23 GUM  
21 clinicians, 10 from London and 13 from elsewhere in the UK (Supplementary Table 2).  
22  
23  
24  
25

26 The total annual number of people attending English GUM services for STI testing was obtained from  
27 national surveillance data (GUMCAD 2015 data).<sup>7</sup> This was combined with the clinician survey results  
28 on the proportion of symptomatic attendees, to estimate 965,988 total symptomatic attendees and by  
29 subgroup (590,787 women, 259,064 men-who-have-sex-with-women [MSW] and 116,137 men-who-  
30 have-sex-with-men [MSM]). We assumed that hypothetical POCTs had similar sensitivity and  
31 specificity to the best performing currently available CT-NG POCTs.<sup>10</sup> The prevalence of CT, NG, MG  
32 and TV in GUM attendees (Table 1, variables 12-21) was estimated using published studies and  
33 preliminary findings from the PRECISE Study<sup>14</sup>, a study evaluating POCTs conducted by St George's,  
34 University of London and Public Health England.  
35  
36  
37  
38  
39  
40  
41  
42  
43  
44  
45  
46  
47  
48  
49  
50  
51  
52  
53  
54  
55  
56  
57  
58  
59  
60

Table 1. Epidemiological and clinical parameters

| Variable                                             | Value |       |       | Distribution | Number                                                                   |         |         | Comments, Reference                                              |
|------------------------------------------------------|-------|-------|-------|--------------|--------------------------------------------------------------------------|---------|---------|------------------------------------------------------------------|
|                                                      | Women | MSW   | MSM   |              | Women                                                                    | MSW     | MSM     |                                                                  |
| 1 Initial clinic attendances                         | 61%   | 27%   | 12%   | Beta         | 590,787                                                                  | 259,064 | 116,137 | Clinician survey results                                         |
| 2 CT infection                                       | 6.5%  | 23.3% | 6.2%  | Beta         | 38,401                                                                   | 60,362  | 7,200   | W <sup>14,15,16</sup> ; MSW <sup>14,17</sup> ; MSM <sup>14</sup> |
| 3 NG infection                                       | 0.7%  | 3.4%  | 38.1% | Beta         | 4,136                                                                    | 8,808   | 44,248  | W <sup>14,15,16</sup> ; MSW <sup>14,17</sup> ; MSM <sup>14</sup> |
| 4 MG infection                                       | 4.2%  | 12.3% | 9.3%  | Beta         | 24,813                                                                   | 31,865  | 10,801  | W <sup>14</sup> ; MSW <sup>14,17</sup> ; MSM <sup>14</sup>       |
| 5 TV infection                                       | 4.4%  | 0.0%  | 0.0%  | Beta         | 25,995                                                                   | -       | -       | W <sup>14,15,16,18</sup> ; MSW <sup>14</sup> ; MSM estimate      |
| 6 CT NG co-infection                                 | 0.3%  | 2.2%  | 6.2%  | Beta         | 1,772                                                                    | 5,699   | 7,200   | W <sup>14,15</sup> ; MSW, MSM <sup>14</sup>                      |
| 7 CT MG co-infection                                 | 1.6%  | 2.8%  | 0.0%  | Beta         | 9,453                                                                    | 7,254   | -       | W, MSW, MSM <sup>14</sup>                                        |
| 8 CT TV co-infection                                 | 0.2%  | 0.0%  | 0.0%  | Beta         | 1,182                                                                    | -       | -       | W <sup>14,15,16</sup> ; MSW <sup>14</sup> ; MSM estimate         |
| 9 NG MG co-infection                                 | 0.6%  | 0.6%  | 1.0%  | Beta         | 3,545                                                                    | 1,554   | 1,161   | W, MSW, MSM <sup>14</sup>                                        |
| 10 NG TV co-infection                                | 0.4%  | 0.0%  | 0.0%  | Beta         | 2,363                                                                    | -       | -       | W <sup>16</sup> ; MSW <sup>14</sup> ; MSM estimate               |
| 11 MG TV co-infection                                | 1.0%  | 0.0%  | 0.0%  | Beta         | 5,908                                                                    | -       | -       | W <sup>14</sup> ; MSW, MSM estimate                              |
| 12 Sensitivity of microscopy for detecting NG        | 40%   | 75%   | 75%   | Uniform      | Estimate based on published studies and clinical experience <sup>8</sup> |         |         |                                                                  |
| 13 Specificity of microscopy for detecting NG        | 100%  | 100%  | 100%  | Uniform      | Estimate based on published studies and clinical experience <sup>8</sup> |         |         |                                                                  |
| 14 Sensitivity of microscopy for detecting TV        | 50%   | 50%   | 50%   | Uniform      | Assumption based on clinical experience                                  |         |         |                                                                  |
| 15 Specificity of microscopy for detecting TV        | 100%  | 100%  | 100%  | Uniform      | Assumption based on clinical experience                                  |         |         |                                                                  |
| 16 Sensitivity of current NAAT test for CT-NG        | 97%   | 97%   | 97%   | Uniform      | Typical of best-performing tests currently used <sup>19</sup>            |         |         |                                                                  |
| 17 Specificity of current NAAT test for CT-NG        | 97%   | 97%   | 97%   | Uniform      | Typical of best-performing tests currently used <sup>19</sup>            |         |         |                                                                  |
| 18 Sensitivity of POCTs for CT/NG/MG/TV              | 95%   | 95%   | 95%   | Uniform      | Estimate based on tests currently available <sup>10</sup>                |         |         |                                                                  |
| 19 Specificity of POCTs for CT/TV/MG                 | 96%   | 96%   | 96%   | Uniform      | Estimate based on tests currently available <sup>10</sup>                |         |         |                                                                  |
| 20 Specificity of POCTs for NG                       | 98%   | 98%   | 98%   | Uniform      | Estimate based on tests currently available <sup>10</sup>                |         |         |                                                                  |
| 21 CT infection - probability of PID                 | 16%   | -     | -     | Normal       | Estimate based on published studies <sup>2</sup>                         |         |         |                                                                  |
| 22 NG infection - probability of PID                 | 16%   | -     | -     | Normal       | Estimate based on published studies <sup>20</sup>                        |         |         |                                                                  |
| 23 MG infection - probability of PID                 | 4%    | -     | -     | Normal       | Estimate based on published studies <sup>1</sup>                         |         |         |                                                                  |
| 24 TV infection - probability of PID                 | 0%    | -     | -     | Normal       | Assumption                                                               |         |         |                                                                  |
| 25 Microscopy at first attendance                    | 84%   | 84%   | 84%   | Uniform      | Assumption, clinician survey results                                     |         |         |                                                                  |
| 26 Presumptive treatment for CT                      | 50%   | 50%   | 50%   | Normal       | Estimate based on clinical practice                                      |         |         |                                                                  |
| 27 Proportion of MG infections cured by CT treatment | 67%   | 67%   | 67%   | Uniform      | Estimate based on published studies <sup>9</sup>                         |         |         |                                                                  |

1  
2  
3  
4 CT, *Chlamydia trachomatis*; MG, *Mycoplasma genitalium*; MSM, men-who-have-sex-with-men; MSW, men-who-have-sex-with women; NAAT, nucleic acid  
5 amplification test; NG, *Neisseria gonorrhoea*; NGU, non-gonococcal urethritis; PID, pelvic inflammatory disease; POCT, point-of-care test; TV, *Trichomonas*  
6 *vaginalis*.  
7  
8  
9  
10  
11  
12  
13  
14  
15  
16  
17  
18  
19  
20  
21  
22  
23  
24  
25  
26  
27  
28  
29  
30  
31  
32  
33  
34  
35  
36  
37  
38  
39  
40  
41  
42  
43  
44  
45  
46  
47

For peer review only

#### Cost and utility parameters

All costs are given in 2015/16 prices (GB, £) and inflated to 2015/16 costs when based on previous estimates using the Hospital and Community Health Services (HCHS) Inflation Indices 2015.<sup>21</sup> The model considered two perspectives for costs: 1) costs to GUM services (micro-costing) associated with testing and management of NG/CT/MG/TV infections plus the cost of treating PID<sup>22</sup> and 2) NHS tariff reimbursements clinics would receive based on attendances (Table 2). Micro-costing was calculated by adapting an existing pathway model<sup>23</sup> which considers costs of staff time, diagnostic kit, drugs, and other consumables. The tariff, an estimated average first and follow-up attendance cost used for commissioning and cross-charging<sup>24</sup>, was estimated using the draft 2015/16 NHS tariff for first and follow-up GUM attendances. Fixed tariffs are not affected by how treatment is administered (oral/intramuscular) or the number of tests performed.

Table 2. Model input parameters: costs and utilities

| Utilities                                                                               |         |                                                                                                       |  |                             |
|-----------------------------------------------------------------------------------------|---------|-------------------------------------------------------------------------------------------------------|--|-----------------------------|
| Asymptomatic health state                                                               | 1.00    | Assume an otherwise healthy population                                                                |  |                             |
| Symptomatic health state                                                                | 0.93    |                                                                                                       |  | Sri, 2016 <sup>25</sup>     |
| Waiting for diagnosis (symptomatic) health state                                        | 0.93    | Assume the same as symptomatic                                                                        |  | Sri, 2016 <sup>25</sup>     |
| Treatment complete i.e. returned to asymptomatic state                                  | 1.00    | Assume they return to asymptomatic                                                                    |  |                             |
| PID diagnosis health state                                                              | 0.80    |                                                                                                       |  | Smith, 2008 <sup>26</sup>   |
| Costs                                                                                   |         |                                                                                                       |  |                             |
| Tariff cost of initial visit plus treatment management                                  | £141.00 | Draft National Tariff Payment System: 2015/16                                                         |  | <sup>24</sup>               |
| Initial clinic visit of symptomatic patient (micro-costing)                             | £103.71 | Patient pathway adapted from a previous model                                                         |  | Adams, 2014 <sup>a 23</sup> |
| Management of STI (oral medication) on same day as assessment <sup>b,c</sup>            | £29.19  | Excludes drug cost                                                                                    |  | Adams, 2014 <sup>a 23</sup> |
| Management of STI (oral medication) at return visit after results <sup>b,c</sup>        | £31.32  | Excludes drug cost                                                                                    |  | Adams, 2014 <sup>a 23</sup> |
| Management of STI (medication via injection) on same day as assessment <sup>c</sup>     | £43.79  | Excludes drug cost                                                                                    |  | Adams, 2014 <sup>a 23</sup> |
| Management of STI (medication via injection) on return visit after results <sup>c</sup> | £44.32  | Excludes drug cost and GC culture/typing lab processing                                               |  | Adams, 2014 <sup>a 23</sup> |
| Standard CT/NG NAAT laboratory diagnostic test <sup>d</sup>                             | £13.17  |                                                                                                       |  | Adams, 2014 <sup>a 23</sup> |
| POCT CT-NG <sup>d</sup>                                                                 | £24.00  | Assumption based on cost of products currently available                                              |  |                             |
| POCT CT-NG-MG <sup>d</sup>                                                              | £29.00  | Assumption based on cost of products currently available                                              |  |                             |
| POCT CT-NG-MG-TV <sup>d</sup>                                                           | £34.00  | Assumption based on cost of products currently available                                              |  |                             |
| Tariff cost of return visit                                                             | £110.00 | Draft National Tariff Payment System: 2015/16                                                         |  | <sup>24</sup>               |
| Return clinic visit of symptomatic patient (micro-costing)                              | £83.25  | Patient pathway adapted from a previous model                                                         |  | Adams, 2014 <sup>a 23</sup> |
| NG test of cure using standard NAAT laboratory test                                     | £41.73  |                                                                                                       |  | Adams, 2014 <sup>a 23</sup> |
| NG test of cure using POC A                                                             | £55.93  |                                                                                                       |  | Adams, 2014 <sup>a 23</sup> |
| Cost of drug treatment (1 <sup>st</sup> line) for CT                                    | £1.20   | Where 95% of patients receive 1g Azithromycin and 5% receive Doxycycline 100mg twice daily for 7 days |  | BNF, 2016 <sup>27</sup>     |
| Cost of drug treatment (1 <sup>st</sup> line) for NG                                    | £5.95   | Single dose Ceftriaxone 500mg deep intramuscular injection                                            |  | BNF, 2016 <sup>27</sup>     |



1  
2  
3  
4  
5  
6  
7  
8  
9  
10  
11  
12  
13  
14  
15  
16  
17  
18  
19  
20  
21  
22  
23  
24  
25  
26  
27  
28  
29  
30  
31  
32  
33  
34  
35  
36  
37  
38  
39  
40  
41  
42  
43  
44  
45  
46  
47

|                                                      |         |                                                                              |                             |
|------------------------------------------------------|---------|------------------------------------------------------------------------------|-----------------------------|
| Cost of drug treatment (1 <sup>st</sup> line) for MG | £1.87   | with single dose 1g Azithromycin<br>Doxycycline 100mg twice daily for 7 days | BNF, 2016 <sup>27</sup>     |
| Cost of drug treatment (1 <sup>st</sup> line) for TV | £0.36   | Metronidazole 2g orally in a single dose                                     | BNF, 2016 <sup>27</sup>     |
| Cost associated with treatment of short-term PID     | £180.52 |                                                                              | Aghaizu, 2011 <sup>22</sup> |

BNF, British National Formulary; CT, *Chlamydia trachomatis*; MG, *Mycoplasma genitalium*; NAAT, nucleic acid amplification test; NG, *Neisseria gonorrhoea*; PID, pelvic inflammatory disease; POC, point-of-care; TV, *Trichomonas vaginalis*.

<sup>a</sup>Costs were inflated to 2015/16 costs using the Hospital and Community Health Services (HCHS) Inflation Indices 2015 produced by the Personal Social Services Research Unit.<sup>21</sup> No data were available for inflation from 2014/15 to 2015/16 so it was assumed to be the same as between 2013/2014 and 2014/15. The UK consumer price index for health services shows similar annual growth in this sector from 2014 which validates this assumption.

<sup>b</sup>The cost of management of MG/TV infection is assumed to be the same as the costs associated with management of CT infection.

<sup>c</sup>These costs vary due to the difference in administrative staff time for patient registration if the patient is treated on the same day or on a subsequent visit.

<sup>d</sup>MSM have samples from three sites (urethral, rectal, pharyngeal) tested at the initial visit, whereas women and MSW typically have one sample taken.

Peer review only

1  
2  
3 Costs of implementing a change in practice, including training costs, were not considered. Costs  
4 associated with testing and treating other causes of lower genitourinary tract symptoms were not  
5 considered.  
6  
7

8 Utilities, measures of health-related quality of life, were used in calculating QALYs for the health states  
9 (asymptomatic, symptomatic, or awaiting test results) incorporated in the decision analytic framework  
10 (Table 2).  
11  
12

### 13 Scenario and sensitivity analysis

14  
15 As well as the base-case analysis, 32 further scenarios were assessed deterministically i.e. where one  
16 or more key parameters were varied based on changing the assumption of that parameter(s) while  
17 holding all others at the base-case level (Supplementary Table 3). Scenarios included: higher STI  
18 prevalence; lower sensitivity and specificity of POCTs; differing microscopy use; cheaper POCTs; and  
19 different LTFU rates.  
20  
21  
22  
23

24 We performed a second order Monte Carlo probabilistic sensitivity analysis (PSA), consistent with best  
25 practice, to estimate base-case ICERs. We converted model inputs from discrete values to  
26 distributions. For cost inputs, we used a normal distribution and varied each cost by 20% for the  
27 standard deviation. We correlated costs of POCTs against the least expensive option to ensure test  
28 costs would change equivalently to the same degree with each simulation. For clinical parameters, we  
29 used beta and normal distributions for probabilities and uniform distributions for test performance.  
30 For utilities, normal distributions were used. The PSA included 5000 simulations and was performed  
31 using recommended procedures<sup>28</sup>. Probabilities that strategies were cost-effective at a range of  
32 willingness-to-pay (WTP) thresholds per QALY gained were presented in cost-effectiveness  
33 acceptability curves (CEACs). CEACs were generated for each subgroup and the total population.  
34 Threshold costs for POCTs at which POC strategies would become cost-saving were calculated to the  
35 nearest £0.25.  
36  
37  
38  
39  
40  
41  
42  
43  
44  
45  
46  
47  
48  
49  
50  
51  
52  
53  
54  
55  
56  
57  
58  
59  
60

## Results

Using micro-costing, the estimated annual cost of testing and managing CT, NG, MG and TV infections in 965,988 symptomatic individuals attending GUM was £113,058,655 using SC. This was the cheapest strategy to clinical services, with POC strategies A, B and C being increasingly expensive at £118,704,963 (5% increase), £124,842,003 (10.4% increase), and £125,313,136 (10.8% increase), respectively (Table 3). The opposite was true when using tariff costs, with SC being the most expensive for commissioners of sexual health care at £172,364,138, and POC strategy C being the least expensive, at £145,912,757 (Table 3).

For peer review only

Table 3. The costs, QALYs, average time to cure, inappropriate treatment and follow-up visits in SC and three POC strategies for symptomatic people attending GUM services

| Sub-group | Strategy | Model Outcomes              |                      |             |                             |                          |                              |                                   |                   |                    |
|-----------|----------|-----------------------------|----------------------|-------------|-----------------------------|--------------------------|------------------------------|-----------------------------------|-------------------|--------------------|
|           |          | Total costs (micro-costing) | Total costs (tariff) | Total QALYs | Average time to cure (days) | Inappropriate treatments | Mean number of visits/person | Return clinic visits <sup>1</sup> | Infected partners | PID cases in women |
| All       | SC       | £113,058,655                | £172,364,138         | 146,532     | 4.3                         | 258,395                  | 1.3                          | 328,726                           | 1,876             | 176                |
|           | POC A    | £118,704,963                | £151,956,910         | 146,656     | 2.3                         | 109,135                  | 1.1                          | 143,205                           | 1,414             | 119                |
|           | POC B    | £124,842,003                | £152,288,107         | 146,626     | 2.1                         | 200,865                  | 1.2                          | 146,216                           | 1,451             | 64                 |
|           | POC C    | £125,313,136                | £145,912,757         | 146,867     | 1.1                         | 23,260                   | 1.1                          | 88,259                            | 1,068             | 64                 |
| Women     | SC       | £65,122,097                 | £99,714,696          | 89,533      | 4.4                         | 176,604                  | 1.3                          | 149,216                           | 764               | 176                |
|           | POC A    | £66,938,018                 | £88,960,028          | 89,584      | 2.4                         | 76,322                   | 1.1                          | 51,446                            | 524               | 119                |
|           | POC B    | £69,853,645                 | £89,101,615          | 89,554      | 2.2                         | 128,806                  | 1.1                          | 52,733                            | 535               | 64                 |
|           | POC C    | £69,285,504                 | £85,008,982          | 89,718      | 1.1                         | 1,607                    | 1.0                          | 15,528                            | 260               | 64                 |
| MSW       | SC       | £29,572,989                 | £46,813,874          | 39,342      | 4.3                         | 54,860                   | 1.4                          | 93,507                            | 459               | -                  |
|           | POC A    | £29,995,704                 | £40,111,202          | 39,389      | 2.1                         | 20,957                   | 1.1                          | 32,574                            | 343               | -                  |
|           | POC B    | £31,717,478                 | £40,614,444          | 39,380      | 2.0                         | 54,863                   | 1.1                          | 37,149                            | 360               | -                  |
|           | POC C    | £31,373,674                 | £38,724,875          | 39,443      | 1.2                         | 13,218                   | 1.1                          | 19,971                            | 285               | -                  |
| MSM       | SC       | £18,363,569                 | £25,835,568          | 17,658      | 4.1                         | 26,931                   | 1.7                          | 86,002                            | 653               | -                  |
|           | POC A    | £21,771,241                 | £22,885,680          | 17,684      | 2.3                         | 11,855                   | 1.5                          | 59,185                            | 546               | -                  |
|           | POC B    | £23,270,880                 | £22,572,047          | 17,692      | 1.5                         | 17,196                   | 1.5                          | 56,334                            | 556               | -                  |
|           | POC C    | £24,653,958                 | £22,178,900          | 17,706      | 1.2                         | 8,436                    | 1.5                          | 52,760                            | 524               | -                  |

<sup>1</sup>Return clinic visit for results and treatment, a test of cure (routine for NG) or because they remain symptomatic.

MSW, men-who-have-sex-with-women; MSM, men-who-have-sex-with-men; POC, point-of-care; PID, pelvic inflammatory disease; QALY, quality-adjusted life year.

Most of the total care pathway cost was the initial attendance cost. In SC, total pathway costs for women were £65,122,097, of this 93% (£60,432,050) were initial attendance costs. For POC strategy C, total pathway costs for women were £69,285,504, of which 98% (£68,041,383) were initial attendance costs.

POC strategy C provided most benefits to the full cohort. POC strategies A, B, and C increased QALYs by 124, 94 and 335, respectively compared to SC (Table 3 and Table 4). Time to cure was shorter and the number of total clinic visits, onward STI transmissions and PID cases were fewer in POC strategies than in SC. Compared to SC, POC strategy C resulted in 240,467 fewer clinic visits, 808 fewer onward STI transmissions, 235,135 averted inappropriate treatments and 112 fewer cases of PID.

Table 4. Cost differences for SC and POC strategies

| Sub-group | Comparison  | QALY difference | Micro-costing   |                      | Tariff costs    |                      |
|-----------|-------------|-----------------|-----------------|----------------------|-----------------|----------------------|
|           |             |                 | Cost difference | ICER (£/QALY gained) | Cost difference | ICER (£/QALY gained) |
| All       | POC A vs SC | 124             | £5,646,309      | £45,516              | -£20,407,228    | <b>Cost-Saving</b>   |
|           | POC B vs SC | 94              | £11,783,348     | £125,197             | -£20,076,031    | <b>Cost-Saving</b>   |
|           | POC C vs SC | 335             | £12,254,482     | £36,585              | -£26,451,382    | <b>Cost-Saving</b>   |
|           | POC B vs A  | -30             | £6,137,039      | <b>Dominated</b>     | £331,197        | <b>Dominated</b>     |
|           | POC C vs B  | 241             | £471,133        | £1,956               | -£6,375,350     | <b>Cost-Saving</b>   |
| Women     | POC A vs SC | 51              | £1,815,921      | £35,608              | -£10,754,668    | <b>Cost-Saving</b>   |
|           | POC B vs SC | 21              | £4,731,548      | £222,568             | -£10,613,081    | <b>Cost-Saving</b>   |
|           | POC C vs SC | 185             | £4,163,407      | £22,448              | -£14,705,715    | <b>Cost-Saving</b>   |
|           | POC B vs A  | -30             | £2,915,627      | <b>Dominated</b>     | £141,587        | <b>Dominated</b>     |
|           | POC C vs B  | 164             | -£568,141       | <b>Cost-Saving</b>   | -£4,092,634     | <b>Cost-Saving</b>   |
| MSW       | POC A vs SC | 47              | £422,715        | £9,005               | -£6,702,672     | <b>Cost-Saving</b>   |
|           | POC B vs SC | 38              | £2,144,488      | £56,104              | -£6,199,430     | <b>Cost-Saving</b>   |
|           | POC C vs SC | 102             | £1,800,685      | £17,724              | -£8,088,999     | <b>Cost-Saving</b>   |
|           | POC B vs A  | -9              | £1,721,773      | <b>Dominated</b>     | £503,242        | <b>Dominated</b>     |
|           | POC C vs B  | 63              | -£343,804       | <b>Cost-Saving</b>   | -£1,889,570     | <b>Cost-Saving</b>   |
| MSM       | POC A vs SC | 26              | £3,407,672      | £130,508             | -£2,949,888     | <b>Cost-Saving</b>   |
|           | POC B vs SC | 35              | £4,907,312      | £141,683             | -£3,263,521     | <b>Cost-Saving</b>   |
|           | POC C vs SC | 48              | £6,290,390      | £131,319             | -£3,656,668     | <b>Cost-Saving</b>   |
|           | POC B vs A  | 9               | £1,499,639      | £175,909             | -£313,633       | <b>Cost-Saving</b>   |
|           | POC C vs B  | 13              | £1,383,078      | £104,258             | -£393,147       | <b>Cost-Saving</b>   |

ICER, incremental cost-effectiveness ratios; MSW, men-who-have-sex-with-women; MSM, men-who-have-sex-with-men; POC, point-of-care; QALY, quality-adjusted life year.

1  
2  
3 ICERs associated with the base-case model are presented in Table 4. POC C highlights cost-  
4 effectiveness relative to other strategies yielding an ICER of £36,585 per QALY gained compared to SC  
5 when using micro-costing estimates. When incorporating NHS tariff costing, this represents a potential  
6 cost-savings of £26,451,382 relative to current practice.  
7  
8

9  
10 CEACs are presented in Figures 2-5. Using micro-costing, for a WTP of £30,000/QALY, the upper  
11 threshold adopted by NICE <sup>29</sup>, SC had a 50% probability of being cost-effective overall, a 17%  
12 probability for women, a 2% probability for MSW and a 99% probability for MSM, relative to the POC  
13 strategies. For a WTP of £25,000, POC C dominates, i.e. is cheaper and yields more benefits than the  
14 other POC strategies for the total cohort, women and MSW. For MSM, SC dominates all strategies  
15 across the thresholds examined. For MSW, POC A had 65% probability of being cost-effective at a WTP  
16 threshold of £10,000 per QALY gained.  
17  
18  
19  
20  
21

22 Results of 32 scenario analyses are summarised in Supplementary Tables 4-7. The proportion of  
23 patients given presumptive treatment (scenarios 21-24) impacted costs hugely. When no presumptive  
24 treatment was given (scenario 21), the cost per QALY was £7,339 and £9,092 more than SC for POC  
25 strategies B and C respectively, whilst POC strategy A was dominated by SC. When all patients without  
26 a diagnosis were presumptively treated for CT, MG or TV, according to which infections had been  
27 ruled out (scenario 24), POC strategies A and C were dominated by SC and POC strategy B cost  
28 £64,300/QALY more than SC.  
29  
30  
31  
32

33  
34 When the utility score for being symptomatic was 10% less than base-case (scenario 25), cost per  
35 QALY was £15,627 more for POC strategy C than for SC. If microscopy was no longer used in POC  
36 strategies (scenario 13), cost per QALY was £16,204 and £29,594 more than SC for POC strategies B  
37 and C respectively, whilst POC strategy A was dominated by SC.  
38  
39

40  
41 If MG and TV prevalence were as high as the estimated prevalence in the US <sup>30,31</sup> (scenario 2), cost per  
42 QALY was £20,530 and £25,548 more than SC for POC strategies B and C respectively, whilst POC  
43 strategy A was dominated by SC. When POCTs were priced the same as the SC test (scenario 31), POC  
44 strategies B and C were cost-saving (using micro-costing).  
45  
46

47  
48 Holding all other parameters constant using base-case assumptions, POC strategies would be cost-  
49 saving compared to SC, if POCTs cost £19.25, £13.50 and £21.00, respectively for POCTs A, B and C.  
50  
51  
52  
53  
54  
55  
56  
57  
58  
59  
60

## DISCUSSION

### Principle findings

This study compared costs, benefits and cost-effectiveness of a laboratory-based CT-NG NAAT, with three POC strategies for: A) CT-NG; B) CT-NG-MG; C) CT-NG-MG-TV. Using our initial assumptions for the total population using the micro-costing approach to assess direct costs to health-care services, each POC strategy cost more than SC, but yielded additional benefits. The proportion of patients given presumptive treatment and the cost of the POCT kit both impacted the costs hugely. Results indicated that different strategies would be cost-effective for different patient sub-groups depending on the WTP threshold in place. POC strategy A was most cost-effective for MSW, POC strategy C for women, and SC for MSM. Whether using different testing strategies on different patient groups would be practical or acceptable was beyond the scope of this research and requires further investigation. Different results were obtained when tariff reimbursement costs were used, with POC strategy C costing the least and providing the most benefits.

### Strengths and weaknesses

Our analysis has several strengths. This is the first study to compare the cost-effectiveness of the three different STI POC strategies with SC. Comparable and consistent methods were used to construct a model with inputs from multiple sources including published studies, published data (for costs), national surveillance data plus expert opinion. The model incorporated uncertainty in multiple input parameters by using a second order Monte Carlo PSA and numerous scenarios were assessed in sensitivity analysis.

Potential limitations should be considered. While it is thought that most UK clinicians follow British Association for Sexual Health and HIV (BASHH) guidelines for STI testing and treatment<sup>9,19</sup>, there is diversity in the testing and management strategies employed to meet specific patient needs, both within and between clinics. This diversity, the paucity of published data on treatment pathways and gaps in treatment guidelines, made building a representative SC pathway problematic. There were few published data for some input parameters, for example, the percentage of patients who are presumptively treated without a microbiological result, the percentage returning to clinics after initial treatment and the percentage of patients attending with symptoms – all parameters which are likely to vary somewhat between clinics. We tried to overcome this using different scenario analysis and by collecting data using an online survey for GUM clinicians, albeit from a small sample size. Data from the survey showed high variation between clinics for some parameters. For example, the percentage of patients attending with symptoms ranged from 0% to 90%. There were few published data on

1  
2  
3 utilities and sexual behaviour whilst symptomatic with an STI, whilst waiting for test results and whilst  
4 being on treatment for an STI. Both qualitative and quantitative research is needed in this area to  
5 inform future health economic analyses and to understand preferences for and impact on patients of  
6 introducing POC testing.  
7  
8

9  
10 The staffing and consumable cost data used in the model were average costs. In reality, different sites  
11 use staff of different grades and salaries to perform similar tasks and negotiate different costs for  
12 consumables, implying an inevitable variation in how cost effective the different strategies would be  
13 for different sites.  
14  
15

16  
17 The costs associated with long-term complications of STIs were not considered<sup>32</sup>. This limitation  
18 means that the results are conservative, as the costs associated with SC are likely to be  
19 underestimated. However, the long-term benefits for a single round of testing were thought to be very  
20 low and to not have a major impact on the magnitude of results.  
21  
22  
23

24  
25  
26 Comparing the results to other studies. POC pathways generated some cost savings, primarily because  
27 patients had fewer return visits. However, these did not outweigh the higher cost of the POCTs  
28 compared to laboratory-based NAATs when estimating total pathway costs. This means that if POC  
29 testing was used, there would be expected overall cost increases based on the analysis using the  
30 micro-costing approach. This differs from previous modelling, in which a CT-NG POCT was cost saving  
31 compared to laboratory testing<sup>5</sup>. In the Turner *et al.* model, the cost of a POC attendance was £6.95  
32 cheaper than the cost of an SC attendance since the asymptomatic POC pathway was redesigned. In  
33 our model, the cost of attendance for a symptomatic patient was the same whether samples were  
34 sent to a laboratory or performed in clinic, since all symptomatic clinic attendees would require  
35 examination and microscopy.  
36  
37  
38  
39  
40  
41  
42  
43

44 Implications for public health, clinicians and people using GUM services

45  
46 POC strategy C significantly decreased the numbers of inappropriate antibiotics given compared to SC,  
47 with over 235,000 fewer inappropriate treatments. Many of these treatments are likely to include  
48 azithromycin, which when inappropriately given can encourage spread of macrolide antibiotic  
49 resistance in MG infections<sup>6</sup>. POC strategy C also increased costs for health providers while decreasing  
50 tariff costs for commissioners, unless the “freed-up” capacity enabled by POC strategy C was used for  
51 STI screening appointments and initial assessments for symptomatic people. Although this would likely  
52 have a positive impact on public health, given GUM services in England face increasing pressure on  
53  
54  
55  
56  
57  
58  
59  
60



1  
2  
3 their services with more than 2 million new attendances annually<sup>7</sup>, while local authorities equally face  
4 fiscal pressures, this work demonstrates the potential tensions between different cost-consequences  
5 for procurers and providers and public health benefits when considering implementation of novel  
6 health technologies.  
7  
8

9  
10 For people using GUM services, there are numerous benefits to POC testing compared to SC. People  
11 would need fewer clinic visits, saving them time and reducing LTFU and reducing their costs such as  
12 out-of-pocket expenses and productivity losses. Receiving a diagnosis at the initial attendance reduces  
13 anxiety compared to waiting for test results<sup>25</sup>. A negative result from a multi-pathogen POCT will  
14 support the development of clearer guidelines for clinicians, which could also reassure patients,  
15 particularly those with vague genital tract symptoms. Receiving effective treatment at initial  
16 attendance is likely to reduce the duration of symptoms and reproductive health sequelae.<sup>1,2</sup>  
17  
18  
19  
20  
21

22 POCTs can also generate public health benefits from swifter diagnosis and treatment, for example,  
23 POC strategy C led to an estimated 43% fewer onward transmissions of STIs compared to SC. The  
24 ability to diagnose or rule out specific infections at first attendance enables accurate treatment and  
25 reduces inappropriate antibiotic use, crucial for good antibiotic stewardship, the economic benefits of  
26 which are substantial and well documented.<sup>33</sup>  
27  
28  
29  
30

### 31 Unanswered questions and future research

32  
33 Although a rapid test for CT and NG is used in some GUM services, multi-pathogen configurations of  
34 CT-NG-MG-TV POCTs are not currently available. As such, likely pathways for POC strategies had to be  
35 designed based on expert opinion. Published audits of GUM patient pathways would be a useful  
36 addition to the literature. To reduce uncertainty in economic analyses around STIs, further evidence is  
37 also needed on underlying STI prevalence and the risk of onward STI transmission.  
38  
39  
40  
41

42 Patient pathways and testing protocols vary between sites and different sites see different  
43 proportions of people from the three sub-groups. As such, the costs of changing to a POC strategy will  
44 vary between sites as will the benefits and costs not considered in the model. Validated and easy to  
45 use computational tools for clinics and commissioners, which assess the economic impact of  
46 implementing any one of the POC strategies, using local population data, would increase  
47 understanding across stakeholders.  
48  
49  
50  
51

### 52 Conclusion

1  
2  
3 In conclusion, the results suggest that although potentially more expensive, a quadruplex test for CT-  
4 NG-MG-TV is more cost-effective than SC and the other testing strategies assessed, providing the most  
5 additional benefits to patients. Cost implications are driven by the cost of POCTs and would vary  
6 somewhat in different geographical areas due to differences in the subgroup mix and the prevalence  
7 of the four STIs.  
8  
9

## 10 11 12 **Footnotes**

13  
14 We thank Dr Hamish Mohammed, Principal Scientist (STI Epidemiology) at Public Health England for  
15 providing data and support interpreting GUMCAD data.  
16

17  
18 Contributors: All authors were involved in the conception and design of the research. STS, EHE, RHT  
19 and SSF provided input into current clinical practice relating to patient pathways in GUM. SEH  
20 estimated all parameter inputs and drafted the manuscript with support from EJA and MJH. RMB  
21 developed the model with input from EJA, SEH and MJH. All authors contributed to the interpretation  
22 of the model and approved the final version. STS acts as guarantor of the study.  
23  
24  
25

26  
27 Competing interests: All authors have completed the Unified Competing Interest Form and declare  
28 financial support from Innovate UK; EJA, SEH, MJH are employees of Aquarius Population Health (APH)  
29 which reports grants from Innovate UK grant to Atlas Genetics, during the conduct of the study; other  
30 from Cepheid, St Georges University of London, Enigma Diagnostics, and AstraZeneca, on STI and POC  
31 research outside the submitted work; RHB is a Lecturer and Programme Director of Economics at St.  
32 Angela's College Sligo/ NUI Galway and an academic staff member of the Health Economics and Policy  
33 Analysis Centre (HEPAC) at NUI Galway, providing health economic support to Aquarius Population  
34 Health on an ad-hoc consultancy basis. STS, EHE, SSF are members of the Applied Diagnostic Research  
35 and Evaluation Unit at St George's, University of London, which has received funding from Atlas  
36 Genetics, Alere, Cepheid, Speedx and Sekisui. STS has received NIHR funding to develop a POCT with  
37 Atlas.  
38  
39  
40  
41  
42  
43  
44

45  
46 Funding: This work was supported by Innovate UK SBRI grant no. 971452, awarded to Atlas Genetics  
47 Ltd. Atlas Genetics and Innovate UK had no role in the study design; in the collection, analysis, and  
48 interpretation of data; in the writing of the report; and in the decision to submit the article for  
49 publication.  
50  
51

52  
53 Ethical approval: Not required.  
54  
55  
56  
57  
58  
59  
60

1  
2  
3 All authors had full access to the data (including statistical reports and tables) in the study and can  
4 take responsibility for the integrity of the data and the accuracy of the data analysis.  
5

6  
7 Transparency: The senior author (STS) affirms that the manuscript is an honest, accurate, and  
8 transparent account of the study being reported, that no important aspects of the study have been  
9 omitted, and that any discrepancies from the study as planned (and, if relevant, registered) have been  
10 explained.  
11  
12

13  
14 Data sharing: no additional data available.  
15  
16  
17  
18  
19  
20  
21  
22  
23  
24  
25  
26  
27  
28  
29  
30  
31  
32  
33  
34  
35  
36  
37  
38  
39  
40  
41  
42  
43  
44  
45  
46  
47  
48  
49  
50  
51  
52  
53  
54  
55  
56  
57  
58  
59  
60

For peer review only

## References

- 1 Oakeshott P, Aghaizu A, Hay P, *et al.* Is *Mycoplasma genitalium* in women the “New Chlamydia?” A community-based prospective cohort study. *Clin Infect Dis* 2010;51:1160–6.
- 2 Price MJ, Ades AE, De Angelis D, *et al.* Risk of pelvic inflammatory disease following *Chlamydia trachomatis* infection: analysis of prospective studies with a multistate model. *Am J Epidemiol* 2013;178:484–92.
- 3 Liu B, Roberts CL, Clarke M, *et al.* Chlamydia and gonorrhoea infections and the risk of adverse obstetric outcomes: a retrospective cohort study. *Sex Transm Infect* 2013;89:672–8.
- 4 Hitti J, Garcia P, Totten P, *et al.* Correlates of cervical *Mycoplasma genitalium* and risk of preterm birth among Peruvian women. *Sex Transm Dis* 2010;37:81–5.
- 5 Turner KME, Round J, Horner P, *et al.* An early evaluation of clinical and economic costs and benefits of implementing point of care NAAT tests for *Chlamydia trachomatis* and *Neisseria gonorrhoea* in genitourinary medicine clinics in England. *Sex Transm Infect* 2013;sextrans-2013-051147.
- 6 Jensen JS, Bradshaw C. Management of *Mycoplasma genitalium* infections - can we hit a moving target? *BMC Infect Dis* 2015;15:343.
- 7 Public Health England. Sexually transmitted infections (STIs): annual data tables, 2006-2015. Public Health England [www.gov.uk/government/statistics/sexually-transmitted-infections-stis-annual-data-tables](http://www.gov.uk/government/statistics/sexually-transmitted-infections-stis-annual-data-tables) (accessed 20 Sep 2016).
- 8 Thorley N, Radcliffe K. The performance and clinical utility of cervical microscopy for the diagnosis of gonorrhoea in women in the era of the NAAT. *Int J STD AIDS* 2015;26:656–60.
- 9 Horner P, Blee K, O’Mahony C, *et al.* 2015 UK National Guideline on the management of non-gonococcal urethritis. *Int J STD AIDS* 2016;27:85–96.
- 10 Herbst de Cortina S, Bristow CC, Joseph Davey D, *et al.* A Systematic Review of Point of Care Testing for *Chlamydia trachomatis*, *Neisseria gonorrhoeae*, and *Trichomonas vaginalis*. *Infect Dis Obstet Gynecol* 2016;4386127.
- 11 Huang W, Gaydos CA, Barnes MR, *et al.* Comparative effectiveness of a rapid point-of-care test for detection of *Chlamydia trachomatis* among women in a clinical setting. *Sex Transm* 2013;89:108–14.
- 12 Atlas Genetics. Atlas Genetics wins SBRI grant from Innovate UK. 2016. <http://atlasgenetics.com/130-atlas-genetics-wins-sbri-grant-from-innovate-uk>
- 13 Harding-Esch, EM, Fuller, SS, Chow, C, *et al.* Performance of a prototype chlamydia and gonorrhoea recombinase polymerase amplification point-of-care test in three sexual health clinics. In: *Eighth Meeting of the European Society for Chlamydia Research*. Oxford, UK: 2016. [www.escr2016.co.uk/programme.pdf](http://www.escr2016.co.uk/programme.pdf) (Accessed 4 Jan 2017).
- 14 S Tariq Sadiq personal communication. PRECISE preliminary results. 2016.

- 15 Shone J, Winter A, Jones BL, *et al*. A Scottish multi-centre service evaluation examining the prevalence and diagnosis of *Trichomonas vaginalis* in symptomatic women attending sexual health clinics. *Int J STD AIDS* Published Online First: 30 September 2015. doi:10.1177/0956462415606850
- 16 Nathan B, Appiah J, Saunders P, *et al*. Microscopy outperformed in a comparison of five methods for detecting *Trichomonas vaginalis* in symptomatic women. *Int J STD AIDS* 2015;**26**:251–6. doi:10.1177/0956462414534833
- 17 Chalker VJ, Jordan K, Ali T, *et al*. Real-time PCR detection of the mg219 gene of unknown function of *Mycoplasma genitalium* in men with and without non-gonococcal urethritis and their female partners in England. *J Med Microbiol* 2009;**58**:895–9. doi:10.1099/jmm.0.009977-0
- 18 Lord E, Newnham T, Dorrell L, *et al*. Detecting asymptomatic *Trichomonas vaginalis* in females using the BD ProbeTec™ *Trichomonas vaginalis* Qx nucleic acid amplification test. *Int J STD AIDS* Published Online First: 5 May 2016. doi:10.1177/0956462416649888
- 19 Nwokolo NC, Dragovic B, Patel S, *et al*. 2015 UK national guideline for the management of infection with *Chlamydia trachomatis*. *Int J STD AIDS* 2016;**27**:251–67.
- 20 Reekie J, Donovan B, Guy R, *et al*. Hospitalisations for pelvic inflammatory disease temporally related to a diagnosis of *Chlamydia* or gonorrhoea: a retrospective cohort study. *PLoS One* 2014;**9**:e94361. doi:10.1371/journal.pone.0094361
- 21 PSSRU | Unit Costs of Health and Social Care 2015. [www.pssru.ac.uk/project-pages/unit-costs/2015/](http://www.pssru.ac.uk/project-pages/unit-costs/2015/) (accessed 29 Sep 2016).
- 22 Aghaizu A, Adams EJ, Turner K, *et al*. What is the cost of pelvic inflammatory disease and how much could be prevented by screening for *Chlamydia trachomatis*? Cost analysis of the Prevention of Pelvic Infection (POPI) trial. *Sex Trans* 2011;**87**:312–7.
- 23 Adams EJ, Ehrlich A, Turner KME, *et al*. Mapping patient pathways and estimating resource use for point of care versus standard testing and treatment of chlamydia and gonorrhoea in genitourinary medicine clinics in the UK. *BMJ Open* 2014;**4**.
- 24 Monitor. 2016/17 National Tariff Payment System: draft prices. 2016. [www.gov.uk/government/publications/201617-national-tariff-payment-system-draft-prices](http://www.gov.uk/government/publications/201617-national-tariff-payment-system-draft-prices) (accessed 21 Jun 2016).
- 25 Sri T, Southgate E, Kerry SR, *et al*. Health-related quality of life and *Chlamydia trachomatis* infection in sexually experienced female inner-city students: a community-based cross-sectional study. *Int J STD AIDS* Published Online First: 6 May 2016.
- 26 Smith KJ, Tsevat J, Ness RB, *et al*. Quality of life utilities for pelvic inflammatory disease health states. *Sex Transm Dis* 2008;**35**:307–11.
- 27 BNF September 2016. <https://www.evidence.nhs.uk/formulary/bnf/current> (accessed 29 Sep 2016).
- 28 Briggs AH, Weinstein MC, Fenwick EA, *et al*. Model parameter estimation and uncertainty analysis a report of the ISPOR-SMDM Modelling Good Research Practices Task Force Working Group–6. *Med Decis Making* 2012;**32**:722–32.

- 1  
2  
3 29 National Institute for Health and Care Excellence. Judging whether public health interventions  
4 offer value for money. 2013. [www.nice.org.uk/advice/lgb10/chapter/judging-the-cost-](http://www.nice.org.uk/advice/lgb10/chapter/judging-the-cost-effectiveness-of-public-health-activities)  
5 [effectiveness-of-public-health-activities](http://www.nice.org.uk/advice/lgb10/chapter/judging-the-cost-effectiveness-of-public-health-activities) (accessed 31 Oct 2017).  
6  
7 30 Getman D, Jiang A, O'Donnell M, *et al*. Mycoplasma genitalium Prevalence, Coinfection, and  
8 Macrolide Antibiotic Resistance Frequency in a Multicenter Clinical Study Cohort in the United  
9 States. *J Clin Microbiol* 2016;54:2278–83.  
10  
11 31 Alcaide ML, Feaster DJ, Duan R, *et al*. The incidence of Trichomonas vaginalis infection in women  
12 attending nine sexually transmitted diseases clinics in the USA. *Sex Transm Infect* 2016;92:58–62.  
13  
14 32 Davies B, Turner KME, Frølund M, *et al*. Risk of reproductive complications following chlamydia  
15 testing: a population-based retrospective cohort study in Denmark. *Lancet Infect Dis* Published  
16 Online First: 8 June 2016.  
17  
18 33 Smith R, Coast J. The true cost of antimicrobial resistance. *BMJ* 2013;346:f1493.  
19  
20  
21  
22  
23  
24  
25  
26  
27  
28  
29  
30  
31  
32  
33  
34  
35  
36  
37  
38  
39  
40  
41  
42  
43  
44  
45  
46  
47  
48  
49  
50  
51  
52  
53  
54  
55  
56  
57  
58  
59  
60

Figure 1. Diagram showing simplified patient flow through the model

**Standard care (SC):** 50% of people not diagnosed with NG or TV by microscopy will be presumptively treated for CT. The treatment is effective against CT, 67% of MG<sup>9</sup>, and against all other non-specific bacterial STIs (i.e. not CT/NG/MG/TV). We assume this treatment is not effective against TV or NG. Incorrectly treated patients with NG infection will be diagnosed by NAAT, and return (minus those LTFU) to receive treatment. Other returning patients may receive presumptive treatment for MG and TV.

**POC strategy A:** 50% of people not diagnosed by microscopy or POCT would be presumptively treated for MG and TV. We assume that this treatment is effective against CT, MG, TV, and against all other non-specific bacterial STIs. We assume that this treatment is not effective against NG. Patients not initially presumptively treated but who return to the clinic are then presumptively treated with MG and TV treatment.

**POC strategy B:** 50% of people not diagnosed by microscopy or POCT would be presumptively treated for TV. We assume this treatment is effective against TV, and against all other non-specific bacterial STIs. We assume this treatment is not effective against CT, MG, or NG.

**POC strategy C:** 100% of people who are not diagnosed by microscopy or POC would be presumptively treated using azithromycin. We assume this treatment is effective against CT, 67% of MG<sup>9</sup>, and against all other non-specific bacterial STIs. We assume this treatment is not effective against TV or NG. If any treated patients return they will be categorised as 'investigate further'. The cost of the 'investigate further' is the cost of a standard return appointment which includes microscopy.

1  
2  
3 Figure 2. Cost-effectiveness acceptability curves (CEACs): point-of-care test (POCT) strategies vs  
4 standard care

5  
6 Footnote: MSM, men who have sex with men; MSW men who have sex with women; W, women.  
7  
8  
9  
10  
11  
12  
13  
14  
15  
16  
17  
18  
19  
20  
21  
22  
23  
24  
25  
26  
27  
28  
29  
30  
31  
32  
33  
34  
35  
36  
37  
38  
39  
40  
41  
42  
43  
44  
45  
46  
47  
48  
49  
50  
51  
52  
53  
54  
55  
56  
57  
58  
59  
60

For peer review only



1  
2  
3  
4  
5  
6  
7  
8  
9  
10  
11  
12  
13  
14  
15  
16  
17  
18  
19  
20  
21  
22  
23  
24  
25  
26  
27  
28  
29  
30  
31  
32  
33  
34  
35  
36  
37  
38  
39  
40  
41  
42  
43  
44  
45  
46  
47  
48  
49  
50  
51  
52  
53  
54  
55  
56  
57  
58  
59  
60

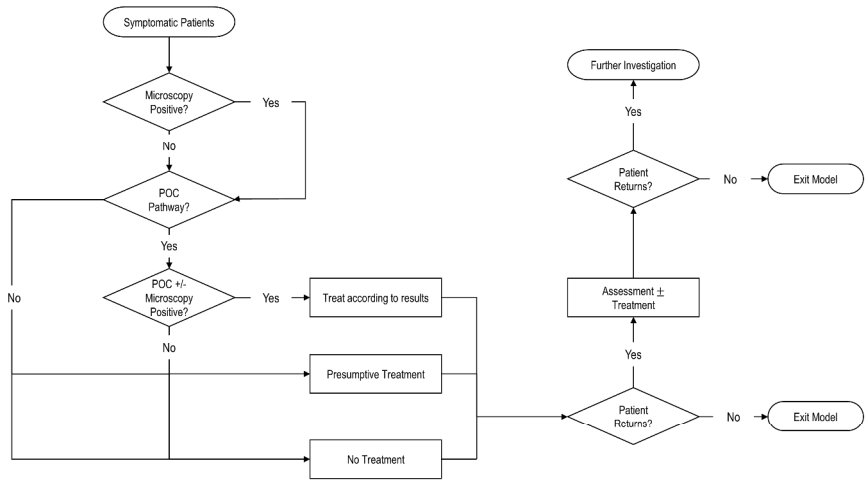

Figure 1.

338x190mm (300 x 300 DPI)

Review only

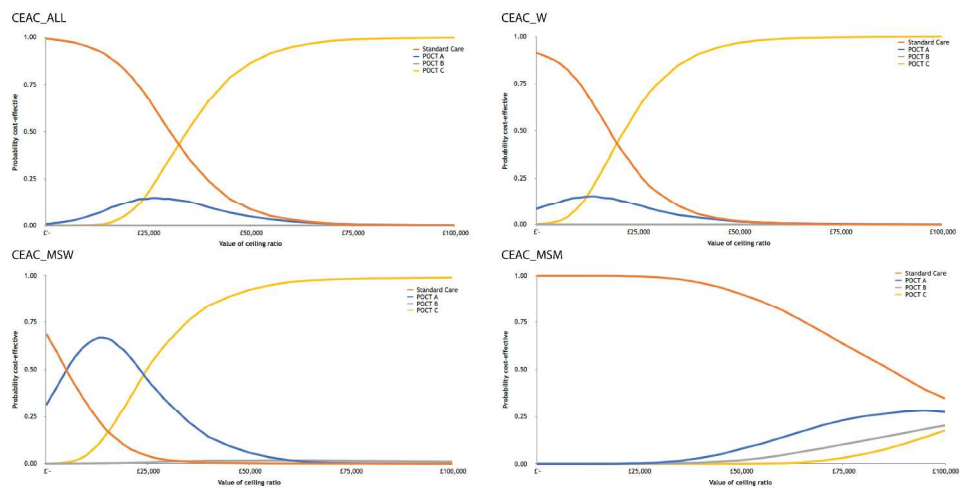

Figure 2 Cost-effectiveness acceptability curves (CEACs): point-of-care test (POCT) strategies vs standard care

596x309mm (300 x 300 DPI)

review only

Supplementary Table 1. Key model assumptions

- 1 The decision framework assumes that after a maximum of 3 courses of treatment the individual would be cured. In standard care, this could take up to 56 days in total; therefore, the cycle length is one day and time horizon is 56 days.
- 2 Screening options will confirm diagnosis between 1-21 days; treatment options will last for a maximum of 7 days and 2 weekly cycles are imposed between treatment regimens. In current practice, we assume that individuals return on day 8 for test results in the base-case.
- 3 The sensitivity (true positive) and specificity (true negative) of POCT for each infection does not vary across the different POC strategies nor does it vary between patient sub-groups.
- 4 The model accounts for the impact of single and dual infections (CT, NG, TV and MG).
- 5 The proportion lost-to-follow-up varies by STI and gender due to the nature of symptoms and severity of individual STIs.
- 6 STI symptoms remain at the same clinical level of severity across the time horizon.
- 7 The model incorporates an 'Other Infection' category which includes all other infections that cause similar lower genital symptoms diagnosed initially (day 0) that rule out an initial diagnosis of CT/NG/MG/TV. These may include candida and allergic reactions. The proportion of the cohort who we assume fall into the "Other infection" category is 1 in 2 for women, 1 in 3 for MSW and 1 in 4 for MSM. We vary this assumption in scenario analysis.
- 8 Once results from screening options are confirmed those with a confirmed STI are treated and partners are made aware of the infection to access treatment.
- 9 Each index infection is assumed to have 1 partner for women and MSW and 2 partners for MSM per 7-day period; this assumption, as well as the number of sexual acts per week, is varied in sensitivity analysis.
- 10 In the absence of any data on changes in sexual behaviour following diagnosis with an STI, it is assumed sexual behaviour is not changed due to a diagnosis. This assumption affords the identification of all potential transmissions; however, taken at face value would be an overestimation of transmissions.
- 11 The model assumes STI transmission rates are constant over the duration of exposure.
- 12 The model assumes different treatment regimens for the different infections as informed by clinical guidance.
- 13 The model assumes the correct treatment for true CT/NG/MG/TV infection is 100% efficacious and ignores antibiotic resistant strains in NG and MG, thereby underestimating the total costs associated with STI infection.
- 14 The model does not include re-infections.
- 15 The model does not consider adverse events associated with treatment options.
- 16 The model does not consider long-term complications associated with STI infection.
- 17 The model limits sub-group analysis to women, MSW and MSM; treatment pathways do not vary by sub-group.

CT, *Chlamydia trachomatis*; MG, *Mycoplasma genitalium*; MSM, men-who-have-sex-with-men; MSW, men-who-have-sex-with-women; NG, *Neisseria gonorrhoea*; POCT, point of care test; STI, sexually transmitted infection, TV, *Trichomonas vaginalis*.

Supplementary Table 2. Summary of GUM clinician survey (October 2016) relevant to patient pathways

| Survey question                                                                           | Median | Lowest | Highest |
|-------------------------------------------------------------------------------------------|--------|--------|---------|
| Roughly how many patients attend your service every month?                                | 1,700  | 80     | 6,000   |
| What proportion of your patients are MSM?                                                 | 10%    | 5%     | 100%    |
| What proportion of your patients are MSW?                                                 | 30%    | 0%     | 85%     |
| What proportion of your patients are women?                                               | 53%    | 0%     | 60%     |
| What proportion of MSM attend with a symptomatic lower genital tract infection?           | 50%    | 5%     | 90%     |
| What proportion of MSW attend with a symptomatic lower genital tract infection?           | 40%    | 0%     | 90%     |
| What proportion of women attend with a symptomatic lower genital tract infection?         | 50%    | 0%     | 80%     |
| What proportion of symptomatic men have a swab that is sent for microscopy?               | 80%    | 25%    | 100%    |
| What proportion of symptomatic men have a swab that is sent for culture?                  | 60%    | 5%     | 100%    |
| What proportion of symptomatic women have a swab that is sent for microscopy?             | 88%    | 0%     | 100%    |
| What proportion of symptomatic women have a swab that is sent for culture?                | 58%    | 0%     | 100%    |
| What proportion of MSM are tested for MG?                                                 | 0%     | 0%     | 10%     |
| What proportion of MSW are tested for MG?                                                 | 0%     | 0%     | 20%     |
| What proportion of women are tested for MG?                                               | 0%     | 0%     | 15%     |
| <b>Men who test negative for CT/NG</b>                                                    |        |        |         |
| What proportion return to your service for a follow-up appointment?                       | 50%    | 5%     | 100%    |
| Of those who return, what proportion receive further tests?                               | 25%    | 0%     | 80%     |
| Of those who return, what proportion receive presumptive treatment for another infection? | 18%    | 5%     | 90%     |
| What proportion are referred to / decide to attend another healthcare setting (e.g. GP)?  | 23%    | 0%     | 65%     |
| <b>Women who test negative for CT/NG</b>                                                  |        |        |         |
| What proportion return to your service for a follow-up appointment?                       | 30%    | 0%     | 75%     |
| Of those who return, what proportion receive further tests?                               | 50%    | 10%    | 100%    |
| Of those who return, what proportion receive presumptive treatment for another infection? | 28%    | 5%     | 100%    |
| What proportion are referred to / decide to attend another healthcare setting (e.g. GP)?  | 20%    | 0%     | 85%     |

CT, *Chlamydia trachomatis*; GP, General Practice; GUM, genitourinary medicine; MG, *Mycoplasma genitalium*; MSM, men-who-have-sex-with-men; MSW, men-who-have-sex-with-women; NG, *Neisseria gonorrhoea*; TV, *Trichomonas vaginalis*.

The online survey was completed by 23 GUM clinicians, 10 from London and 13 from elsewhere in the UK.

Supplementary Table 3. Scenarios assessed

|    |                                                                                                                                                           |
|----|-----------------------------------------------------------------------------------------------------------------------------------------------------------|
| 1  | Higher prevalence of MG and TV (double the current estimated prevalence)                                                                                  |
| 2  | Higher prevalence of MG and TV based on estimated prevalence in symptomatic patients in the US (MG: women 21.1%; men 19.3% and TV: women 25.9%; men 6.3%) |
| 3  | Increase proportion with 'Other infection' as follows: women: 66.6%, MSW: 50%, MSM: 50%                                                                   |
| 4  | Decrease proportion with 'Other infection' as follows: women: 33.3%, MSW: 25%, MSM: 20%                                                                   |
| 5  | 100% increase the rate of LTFU                                                                                                                            |
| 6  | 50% decrease the rate of LTFU                                                                                                                             |
| 7  | Specificity/sensitivity of POCT is 75%                                                                                                                    |
| 8  | Specificity/sensitivity of POCT is 80%                                                                                                                    |
| 9  | Specificity/sensitivity of POCT is 85%                                                                                                                    |
| 10 | Specificity/sensitivity of POCT is 85% for NG (but unaltered for CT, MG and TV)                                                                           |
| 11 | Specificity/sensitivity of POCT is 85% for CT (but unaltered for NG, MG and TV)                                                                           |
| 12 | Specificity/sensitivity of POCT is 85% for MG (but unaltered for CT, NG and TV)                                                                           |
| 13 | No microscopy used in any testing strategy                                                                                                                |
| 14 | 50% people get microscopy                                                                                                                                 |
| 15 | 75% people get microscopy                                                                                                                                 |
| 16 | 100% people get microscopy                                                                                                                                |
| 17 | 84% use of microscopy in current pathway and no use of microscopy in the POC strategy C                                                                   |
| 18 | No microscopy for men (only) in POC strategy C                                                                                                            |
| 19 | No microscopy for women (only) in POC strategy C                                                                                                          |
| 20 | Use of microscopy in POC strategy C only after a negative test result                                                                                     |
| 21 | No presumptive treatment for CT                                                                                                                           |
| 22 | 25% presumptive treatment for CT (of those not diagnosed with NG/TV in microscopy)                                                                        |
| 23 | 75% presumptive treatment for CT (of those not diagnosed with NG/TV in microscopy)                                                                        |
| 24 | 100% presumptive treatment for CT (of those not diagnosed with NG/TV in microscopy)                                                                       |
| 25 | Use 10% reduction in symptomatic utility scores                                                                                                           |
| 26 | Excluding the cost of PID (as not all PID will be treated in the GUM service)                                                                             |
| 27 | Inclusion of the drug costs for doxycycline as treatment for anyone NG/CT/MG/TV negative                                                                  |
| 28 | POCT CT-NG costs the same as laboratory based NAAT                                                                                                        |
| 29 | POCT CT-NG-MG cost the same as laboratory based NAAT                                                                                                      |
| 30 | POCT CT-NG-MG-TV costs the same as laboratory based NAAT                                                                                                  |
| 31 | All POCTs cost the same as laboratory based NAAT                                                                                                          |
| 32 | All POCTs cost £2 less than in base-case                                                                                                                  |

CT, *Chlamydia trachomatis*; GUM, genitourinary medicine; LTFU, lost-to-follow-up; MG, *Mycoplasma genitalium*; MSM, men-who-have-sex-with-men; MSW, men-who-have-sex-with-women; NAAT, nucleic acid amplification test; NG, *Neisseria gonorrhoea*; POC, point-of-care; POCT, point-of-care test; TV, *Trichomonas vaginalis*; US, United States (of America).

Supplementary Table 4. Cost-effectiveness comparison for scenario analyses using micro-costings - All

| Scenario | Cost-effectiveness comparison (£/QALY gained) |             |             |                |                |
|----------|-----------------------------------------------|-------------|-------------|----------------|----------------|
|          | POC A vs SC                                   | POC B vs SC | POC C vs SC | POC B vs POC A | POC C vs POC B |
| 1        | Dominated                                     | £ 17,389    | £ 41,381    | £7,153         | Dominated      |
| 2        | Dominated                                     | £ 20,530    | £ 56,548    | £8,228         | Dominated      |
| 3        | £ 224,378                                     | £ 22,979    | £ 69,517    | £12,300        | Dominated      |
| 4        | Dominated                                     | £ 15,818    | £ 24,163    | £7,107         | £6,353         |
| 5        | Dominated                                     | £ 19,691    | £ 35,749    | £9,196         | Dominated      |
| 6        | Dominated                                     | £ 19,363    | £ 36,221    | £9,196         | Dominated      |
| 7        | Dominated                                     | £ 21,665    | £ 82,996    | £8,870         | Dominated      |
| 8        | Dominated                                     | £ 21,220    | £ 69,561    | £8,865         | Dominated      |
| 9        | Dominated                                     | £ 20,735    | £ 57,596    | £8,891         | Dominated      |
| 10       | Dominated                                     | £ 19,726    | £ 39,414    | £8,986         | Dominated      |
| 11       | Dominated                                     | £ 20,431    | £ 43,314    | £8,265         | Dominated      |
| 12       | Dominated                                     | £ 19,647    | £ 40,917    | £10,034        | Dominated      |
| 13       | Dominated                                     | £ 16,204    | £ 29,594    | £8,703         | Dominated      |
| 14       | Dominated                                     | £ 18,061    | £ 33,245    | £8,989         | Dominated      |
| 15       | Dominated                                     | £ 19,088    | £ 35,286    | £9,140         | Dominated      |
| 16       | Dominated                                     | £ 20,191    | £ 37,493    | £9,297         | Dominated      |
| 17       | Dominated                                     | £ 19,476    | £ 16,053    | £9,196         | £23,574        |
| 18       | Dominated                                     | £ 19,476    | £ 28,889    | £9,196         | £7,998         |
| 19       | Dominated                                     | £ 19,476    | £ 23,566    | £9,196         | £14,332        |
| 20       | Dominated                                     | £ 19,476    | £ 16,053    | £9,196         | £23,574        |
| 21       | Dominated                                     | £7,339      | £9,092      | £3,792         | £2,859         |
| 22       | Dominated                                     | £ 12,055    | £ 18,039    | £5,910         | £552           |
| 23       | Dominated                                     | £ 32,870    | £ 91,155    | £14,987        | Dominated      |
| 24       | Dominated                                     | £ 64,300    | Dominated   | £27,913        | Dominated      |
| 25       | £ 46,988                                      | £ 17,310    | £ 15,627    | £10,948        | £4,554         |
| 26       | Dominated                                     | £ 19,510    | £ 36,120    | £9,211         | Dominated      |
| 27       | Dominated                                     | £ 19,476    | £ 37,040    | £9,196         | Dominated      |
| 28       | £ 43,475                                      | £ 19,476    | £ 36,060    | £21,718        | Dominated      |
| 29       | Dominated                                     | Cost-saving | £ 36,060    | Cost-saving    | Dominated      |
| 30       | Dominated                                     | £ 19,476    | Cost-saving | £9,196         | £74,924        |
| 31       | £ 43,475                                      | Cost-saving | Cost-saving | £218           | £20,817        |
| 32       | Dominated                                     | £ 16,667    | £ 31,058    | £9,196         | Dominated      |

POCT, point-of-care test strategy; QALY, quality-adjusted life year.

Supplementary Table 5. Cost-effectiveness comparison for scenario analyses using micro-costings - Women

| Women    |             | Cost-effectiveness comparison (£/QALY gained) |             |                |                |
|----------|-------------|-----------------------------------------------|-------------|----------------|----------------|
| Scenario | POC A vs SC | POC B vs SC                                   | POC C vs SC | POC B vs POC A | POC C vs POC B |
| 1        | Dominated   | £8,843                                        | £ 25,961    | £4,199         | Dominated      |
| 2        | Dominated   | £8,932                                        | £ 52,744    | £3,587         | Dominated      |
| 3        | Dominated   | £ 13,611                                      | £ 46,391    | £7,257         | Dominated      |
| 4        | Dominated   | £6,915                                        | £ 10,406    | £3,249         | £5,070         |
| 5        | Dominated   | £9,013                                        | £ 21,182    | £4,368         | £1,662         |
| 6        | Dominated   | £8,827                                        | £ 22,264    | £4,368         | £1,662         |
| 7        | Dominated   | £8,012                                        | £ 48,866    | £3,769         | £180           |
| 8        | Dominated   | £8,124                                        | £ 41,683    | £3,848         | £350           |
| 9        | Dominated   | £8,279                                        | £ 34,918    | £3,954         | £588           |
| 10       | Dominated   | £8,732                                        | £ 22,995    | £4,249         | £1,398         |
| 11       | Dominated   | £8,597                                        | £ 25,567    | £3,827         | £1,542         |
| 12       | Dominated   | £8,630                                        | £ 24,992    | £4,563         | £1,556         |
| 13       | Dominated   | £8,344                                        | £ 19,947    | £4,136         | £2,008         |
| 14       | Dominated   | £8,661                                        | £ 21,070    | £4,271         | £1,808         |
| 15       | Dominated   | £8,829                                        | £ 21,658    | £4,341         | £1,702         |
| 16       | Dominated   | £9,004                                        | £ 22,264    | £4,415         | £1,590         |
| 17       | Dominated   | £8,891                                        | Cost-saving | £4,368         | £14,160        |
| 18       | Dominated   | £8,891                                        | £ 21,874    | £4,368         | £1,662         |
| 19       | Dominated   | £8,891                                        | Cost-saving | £4,368         | £14,160        |
| 20       | Dominated   | £8,891                                        | Cost-saving | £4,368         | £14,160        |
| 21       | Dominated   | £4,042                                        | £1,678      | £1,846         | £6,724         |
| 22       | Dominated   | £6,046                                        | £8,172      | £2,856         | £4,238         |
| 23       | Dominated   | £ 13,250                                      | £ 69,756    | £6,878         | Dominated      |
| 24       | Dominated   | £ 20,769                                      | Dominated   | £11,866        | Dominated      |
| 25       | Dominated   | £9,256                                        | £9,545      | £5,197         | £7,575         |
| 26       | Dominated   | £8,930                                        | £ 21,981    | £4,383         | £1,662         |
| 27       | Dominated   | £8,891                                        | £ 23,150    | £4,368         | £951           |
| 28       | Dominated   | £8,891                                        | £ 21,874    | £6,916         | £1,662         |
| 29       | Dominated   | £ 143                                         | £ 21,874    | Cost-saving    | Dominated      |
| 30       | Dominated   | £8,891                                        | Cost-saving | £4,368         | £23,924        |
| 31       | Dominated   | £ 143                                         | Cost-saving | Cost-saving    | £10,304        |
| 32       | Dominated   | £6,671                                        | £ 15,666    | £4,368         | £1,662         |

POCT, point-of-care test strategy; QALY, quality-adjusted life year.

Supplementary Table 6. Cost-effectiveness comparison for scenario analyses using micro-costings - MSW

| MSW | Cost-effectiveness comparison (£/QALY gained) |             |             |             |                |
|-----|-----------------------------------------------|-------------|-------------|-------------|----------------|
|     | Scenario                                      | POC A vs SC | POC B vs SC | POC C vs SC | POC B vs POC A |
| 1   | £12,263                                       | £22,566     | £21,976     | £39,978     | £20,481        |
| 2   | £6,136                                        | £21,655     | £20,324     | £70,648     | £17,318        |
| 3   | £6,705                                        | £20,051     | £33,219     | £53,907     | £163,024       |
| 4   | £10,163                                       | £104,518    | £12,897     | Dominated   | Cost-saving    |
| 5   | £12,052                                       | £61,168     | £19,205     | Dominated   | Cost-saving    |
| 6   | £7,525                                        | £53,665     | £16,992     | Dominated   | Cost-saving    |
| 7   | £265,801                                      | Dominated   | £64,478     | Dominated   | Cost-saving    |
| 8   | £100,276                                      | Dominated   | £50,420     | Dominated   | Cost-saving    |
| 9   | £49,716                                       | Dominated   | £38,304     | Dominated   | Cost-saving    |
| 10  | £10,139                                       | £60,983     | £19,061     | Dominated   | Cost-saving    |
| 11  | £44,559                                       | £243,310    | £28,123     | Dominated   | Cost-saving    |
| 12  | £9,005                                        | £109,035    | £22,985     | Dominated   | Cost-saving    |
| 13  | £5,013                                        | £44,501     | £15,654     | Dominated   | Cost-saving    |
| 14  | £7,253                                        | £50,948     | £16,857     | Dominated   | Cost-saving    |
| 15  | £8,521                                        | £54,669     | £17,490     | Dominated   | Cost-saving    |
| 16  | £9,906                                        | £58,793     | £18,147     | Dominated   | Cost-saving    |
| 17  | £9,005                                        | £56,104     | Cost-saving | Dominated   | Cost-saving    |
| 18  | £9,005                                        | £56,104     | Cost-saving | Dominated   | Cost-saving    |
| 19  | £9,005                                        | £56,104     | £17,724     | Dominated   | Cost-saving    |
| 20  | £9,005                                        | £56,104     | Cost-saving | Dominated   | Cost-saving    |
| 21  | Cost-saving                                   | Cost-saving | Cost-saving | £20,002     | £929           |
| 22  | Cost-saving                                   | £9,663      | £4,599      | £121,977    | Cost-saving    |
| 23  | £80,063                                       | Dominated   | £62,970     | Dominated   | Cost-saving    |
| 24  | Dominated                                     | Dominated   | Dominated   | Dominated   | Cost-saving    |
| 25  | £3,870                                        | £24,112     | £7,614      | Dominated   | Cost-saving    |
| 26  | £9,005                                        | £56,104     | £17,724     | Dominated   | Cost-saving    |
| 27  | £9,005                                        | £56,104     | £18,456     | Dominated   | Cost-saving    |
| 28  | Cost-saving                                   | £56,104     | £17,724     | Dominated   | Cost-saving    |
| 29  | £9,005                                        | £2,696      | £17,724     | £36,667     | £26,789        |
| 30  | £9,005                                        | £56,104     | Cost-saving | Dominated   | Cost-saving    |
| 31  | Cost-saving                                   | £2,696      | Cost-saving | Dominated   | Cost-saving    |
| 32  | Cost-saving                                   | £42,549     | £12,624     | Dominated   | Cost-saving    |

MSW, Men-who-have-sex-with-women; POCT, point-of-care test strategy; QALY, quality-adjusted life year.



Supplementary Table 7. Cost-effectiveness comparisons for scenario analyses using micro-costings - MSM

| MSM Scenario | Cost-effectiveness comparison (£/QALY gained) |             |             |                |                |
|--------------|-----------------------------------------------|-------------|-------------|----------------|----------------|
|              | POC A vs SC                                   | POC B vs SC | POC C vs SC | POC B vs POC A | POC C vs POC B |
| 1            | £137,378                                      | £95,423     | £139,260    | £49,813        | Dominated      |
| 2            | £119,952                                      | £83,250     | £145,988    | £42,999        | Dominated      |
| 3            | £91,163                                       | £83,961     | £332,964    | £71,307        | Dominated      |
| 4            | £140,882                                      | £160,599    | £115,724    | £235,703       | £52,018        |
| 5            | £135,796                                      | £145,798    | £134,186    | £175,909       | £104,258       |
| 6            | £127,894                                      | £139,636    | £1,044      | £175,909       | £1,317         |
| 7            | £833,775                                      | £2,053,305  | £350,136    | Dominated      | £78,956        |
| 8            | £425,499                                      | £591,462    | £268,835    | £4,264,237     | £84,090        |
| 9            | £271,627                                      | £324,923    | £211,896    | £579,296       | £89,914        |
| 10           | £191,294                                      | £191,613    | £173,306    | £192,369       | £130,727       |
| 11           | £168,341                                      | £173,675    | £143,342    | £187,785       | £85,861        |
| 12           | £130,508                                      | £167,524    | £141,202    | £406,528       | £88,559        |
| 13           | £47,590                                       | £64,826     | £74,079     | £189,798       | £126,208       |
| 14           | £80,744                                       | £98,423     | £101,384    | £181,298       | £112,461       |
| 15           | £113,144                                      | £127,453    | £122,040    | £177,307       | £106,349       |
| 16           | £175,783                                      | £175,089    | £151,216    | £173,474       | £100,673       |
| 17           | £130,508                                      | £141,683    | £131,189    | £175,909       | £83,111        |
| 18           | £130,508                                      | £141,683    | £131,189    | £175,909       | £83,111        |
| 19           | £130,508                                      | £141,683    | £131,319    | £175,909       | £104,258       |
| 20           | £130,508                                      | £141,683    | £131,189    | £175,909       | £83,111        |
| 21           | £60,065                                       | £77,460     | £84,981     | £164,890       | £116,909       |
| 22           | £85,266                                       | £101,948    | £103,897    | £170,152       | £110,577       |
| 23           | £235,470                                      | £217,337    | £174,644    | £182,233       | £97,951        |
| 24           | £747,941                                      | £417,789    | £253,365    | £189,212       | £91,656        |
| 25           | £56,093                                       | £60,884     | £56,420     | £75,544        | £44,773        |
| 26           | £130,508                                      | £141,683    | £131,319    | £175,909       | £104,258       |
| 27           | £130,508                                      | £141,683    | £131,648    | £175,909       | £105,447       |
| 28           | Cost-saving                                   | £141,683    | £131,319    | £869,045       | £104,258       |
| 29           | £130,508                                      | Cost-saving | £131,319    | Cost-saving    | £681,008       |
| 30           | £130,508                                      | £141,683    | Cost-saving | £175,909       | Cost-saving    |
| 31           | Cost-saving                                   | Cost-saving | Cost-saving | Cost-saving    | Cost-saving    |
| 32           | £130,508                                      | £141,683    | £131,319    | £175,909       | £104,258       |

MSM, Men-who-have-sex-with-men; POCT, point-of-care test strategy; QALY, quality-adjusted life year.

**CHEERS Checklist**

**Items to include when reporting economic evaluations of health interventions**

The **ISPOR CHEERS Task Force Report**, *Consolidated Health Economic Evaluation Reporting Standards (CHEERS)—Explanation and Elaboration: A Report of the ISPOR Health Economic Evaluations Publication Guidelines Good Reporting Practices Task Force*, provides examples and further discussion of the 24-item CHEERS Checklist and the CHEERS Statement. It may be accessed via the *Value in Health* or via the ISPOR Health Economic Evaluation Publication Guidelines – CHEERS: Good Reporting Practices webpage: <http://www.ispor.org/TaskForces/EconomicPubGuidelines.asp>

| Section/item                    | Item No | Recommendation                                                                                                                                                                             | Reported on page No/line No |
|---------------------------------|---------|--------------------------------------------------------------------------------------------------------------------------------------------------------------------------------------------|-----------------------------|
| <b>Title and abstract</b>       |         |                                                                                                                                                                                            |                             |
| Title                           | 1       | Identify the study as an economic evaluation or use more specific terms such as “cost-effectiveness analysis”, and describe the interventions compared.                                    | P1, L1                      |
| Abstract                        | 2       | Provide a structured summary of objectives, perspective, setting, methods (including study design and inputs), results (including base case and uncertainty analyses), and conclusions.    | P2                          |
| <b>Introduction</b>             |         |                                                                                                                                                                                            |                             |
| Background and objectives       | 3       | Provide an explicit statement of the broader context for the study.<br>Present the study question and its relevance for health policy or practice decisions.                               | P4, L20-30                  |
| <b>Methods</b>                  |         |                                                                                                                                                                                            |                             |
| Target population and subgroups | 4       | Describe characteristics of the base case population and subgroups analysed, including why they were chosen.                                                                               | P5                          |
| Setting and location            | 5       | State relevant aspects of the system(s) in which the decision(s) need(s) to be made.                                                                                                       | P5                          |
| Study perspective               | 6       | Describe the perspective of the study and relate this to the costs being evaluated.                                                                                                        | P9, L3                      |
| Comparators                     | 7       | Describe the interventions or strategies being compared and state why they were chosen.                                                                                                    | P5                          |
| Time horizon                    | 8       | State the time horizon(s) over which costs and consequences are being evaluated and say why appropriate.                                                                                   | P2, P9                      |
| Discount rate                   | 9       | Report the choice of discount rate(s) used for costs and outcomes and say why appropriate.                                                                                                 | P9                          |
| Choice of health outcomes       | 10      | Describe what outcomes were used as the measure(s) of benefit in the evaluation and their relevance for the type of analysis performed.                                                    | P5                          |
| Measurement of effectiveness    | 11a     | <i>Single study-based estimates:</i> Describe fully the design features of the single effectiveness study and why the single study was a sufficient source of clinical effectiveness data. | N/A                         |



|    |                         |     |                                                                       |
|----|-------------------------|-----|-----------------------------------------------------------------------|
|    |                         |     | N/A                                                                   |
| 1  |                         | 11b | <i>Synthesis-based estimates:</i> Describe fully the methods used for |
| 2  |                         |     | identification of included studies and synthesis of clinical          |
| 3  |                         |     | effectiveness data.                                                   |
| 4  |                         |     | P5-6                                                                  |
| 5  | Measurement and         | 12  | If applicable, describe the population and methods used to            |
| 6  | valuation of preference |     | elicit preferences for outcomes.                                      |
| 7  | based outcomes          |     | N/A                                                                   |
| 8  | Estimating resources    | 13a | <i>Single study-based economic evaluation:</i> Describe approaches    |
| 9  | and costs               |     | used to estimate resource use associated with the alternative         |
| 10 |                         |     | interventions. Describe primary or secondary research methods         |
| 11 |                         |     | for valuing each resource item in terms of its unit cost.             |
| 12 |                         |     | Describe any adjustments made to approximate to opportunity           |
| 13 |                         |     | costs.                                                                |
| 14 |                         |     | N/A                                                                   |
| 15 |                         | 13b | <i>Model-based economic evaluation:</i> Describe approaches and       |
| 16 |                         |     | data sources used to estimate resource use associated with            |
| 17 |                         |     | model health states. Describe primary or secondary research           |
| 18 |                         |     | methods for valuing each resource item in terms of its unit           |
| 19 |                         |     | cost. Describe any adjustments made to approximate to                 |
| 20 |                         |     | opportunity costs.                                                    |
| 21 |                         |     | P9,10,11                                                              |
| 22 | Currency, price date,   | 14  | Report the dates of the estimated resource quantities and unit        |
| 23 | and conversion          |     | costs. Describe methods for adjusting estimated unit costs to         |
| 24 |                         |     | the year of reported costs if necessary. Describe methods for         |
| 25 |                         |     | converting costs into a common currency base and the                  |
| 26 |                         |     | exchange rate.                                                        |
| 27 |                         |     | P9,10,11                                                              |
| 28 | Choice of model         | 15  | Describe and give reasons for the specific type of decision-          |
| 29 |                         |     | analytical model used. Providing a figure to show model               |
| 30 |                         |     | structure is strongly recommended.                                    |
| 31 |                         |     | Figure 1                                                              |
| 32 | Assumptions             | 16  | Describe all structural or other assumptions underpinning the         |
| 33 |                         |     | decision-analytical model.                                            |
| 34 | Analytical methods      | 17  | Describe all analytical methods supporting the evaluation. This       |
| 35 |                         |     | could include methods for dealing with skewed, missing, or            |
| 36 |                         |     | censored data; extrapolation methods; methods for pooling             |
| 37 |                         |     | data; approaches to validate or make adjustments (such as half        |
| 38 |                         |     | cycle corrections) to a model; and methods for handling               |
| 39 |                         |     | population heterogeneity and uncertainty.                             |
| 40 |                         |     | P12                                                                   |
| 41 |                         |     |                                                                       |
| 42 | <b>Results</b>          |     |                                                                       |
| 43 | Study parameters        | 18  | Report the values, ranges, references, and, if used, probability      |
| 44 |                         |     | distributions for all parameters. Report reasons or sources for       |
| 45 |                         |     | distributions used to represent uncertainty where appropriate.        |
| 46 |                         |     | Providing a table to show the input values is strongly                |
| 47 |                         |     | recommended.                                                          |
| 48 |                         |     | Table 1                                                               |
| 49 | Incremental costs and   | 19  | For each intervention, report mean values for the main                |
| 50 | outcomes                |     | categories of estimated costs and outcomes of interest, as well       |
| 51 |                         |     | as mean differences between the comparator groups. If                 |
| 52 |                         |     | applicable, report incremental cost-effectiveness ratios.             |
| 53 |                         |     | Table 3 & 4                                                           |
| 54 | Characterising          | 20a | <i>Single study-based economic evaluation:</i> Describe the effects   |
| 55 | uncertainty             |     | of sampling uncertainty for the estimated incremental cost and        |
| 56 |                         |     | incremental effectiveness parameters, together with the impact        |
| 57 |                         |     | N/A                                                                   |

|                                                                      |     |                                                                                                                                                                                                                                                                            |         |
|----------------------------------------------------------------------|-----|----------------------------------------------------------------------------------------------------------------------------------------------------------------------------------------------------------------------------------------------------------------------------|---------|
|                                                                      |     | of methodological assumptions (such as discount rate, study perspective).                                                                                                                                                                                                  | N/A     |
|                                                                      | 20b | <i>Model-based economic evaluation</i> : Describe the effects on the results of uncertainty for all input parameters, and uncertainty related to the structure of the model and assumptions.                                                                               | P18, 19 |
| Characterising heterogeneity                                         | 21  | If applicable, report differences in costs, outcomes, or cost-effectiveness that can be explained by variations between subgroups of patients with different baseline characteristics or other observed variability in effects that are not reducible by more information. | P18     |
| <b>Discussion</b>                                                    |     |                                                                                                                                                                                                                                                                            |         |
| Study findings, limitations, generalisability, and current knowledge | 22  | Summarise key study findings and describe how they support the conclusions reached. Discuss limitations and the generalisability of the findings and how the findings fit with current knowledge.                                                                          | P19     |
| <b>Other</b>                                                         |     |                                                                                                                                                                                                                                                                            |         |
| Source of funding                                                    | 23  | Describe how the study was funded and the role of the funder in the identification, design, conduct, and reporting of the analysis. Describe other non-monetary sources of support.                                                                                        | P20     |
| Conflicts of interest                                                | 24  | Describe any potential for conflict of interest of study contributors in accordance with journal policy. In the absence of a journal policy, we recommend authors comply with International Committee of Medical Journal Editors recommendations.                          | P20     |

For consistency, the CHEERS Statement checklist format is based on the format of the CONSORT statement checklist

The **ISPOR CHEERS Task Force Report** provides examples and further discussion of the 24-item CHEERS Checklist and the CHEERS Statement. It may be accessed via the *Value in Health* link or via the ISPOR Health Economic Evaluation Publication Guidelines – CHEERS: Good Reporting Practices webpage: <http://www.ispor.org/TaskForces/EconomicPubGuidelines.asp>

The citation for the CHEERS Task Force Report is:  
 Husereau D, Drummond M, Petrou S, et al. Consolidated health economic evaluation reporting standards (CHEERS)—Explanation and elaboration: A report of the ISPOR health economic evaluations publication guidelines good reporting practices task force. *Value Health* 2013;16:231-50.

# BMJ Open

## A modelling-based evaluation of the costs, benefits and cost-effectiveness of multi-pathogen point-of-care tests for sexually transmitted infections in symptomatic genitourinary medicine clinic attendees

|                                 |                                                                                                                                                                                                                                                                                                                                                                                                                                                                                                                                                                                                                                                                                                                                                                                              |
|---------------------------------|----------------------------------------------------------------------------------------------------------------------------------------------------------------------------------------------------------------------------------------------------------------------------------------------------------------------------------------------------------------------------------------------------------------------------------------------------------------------------------------------------------------------------------------------------------------------------------------------------------------------------------------------------------------------------------------------------------------------------------------------------------------------------------------------|
| Journal:                        | <i>BMJ Open</i>                                                                                                                                                                                                                                                                                                                                                                                                                                                                                                                                                                                                                                                                                                                                                                              |
| Manuscript ID                   | bmjopen-2017-020394.R2                                                                                                                                                                                                                                                                                                                                                                                                                                                                                                                                                                                                                                                                                                                                                                       |
| Article Type:                   | Research                                                                                                                                                                                                                                                                                                                                                                                                                                                                                                                                                                                                                                                                                                                                                                                     |
| Date Submitted by the Author:   | 16-Apr-2018                                                                                                                                                                                                                                                                                                                                                                                                                                                                                                                                                                                                                                                                                                                                                                                  |
| Complete List of Authors:       | Huntington, Susie; Aquarius Population Health Limited<br>Burns, Richéal; Health Economics and Policy Analysis Centre (HEPAC)<br>Harding- Esch, Emma; Public Health England, HIV/STI Department; St George's Institute for Infection & Immunity, Applied Diagnostic Research and Evaluation Unit<br>Harvey , Michael; Aquarius Population Health Limited<br>Hill-Tout, Rachel; St George's University Hospitals NHS Foundation Trust<br>Fuller, Sebastian; St George's Institute for Infection & Immunity, Applied Diagnostic Research and Evaluation Unit<br>Adams, Elisabeth; Aquarius Population Health Limited<br>Sadiq, S. Tariq; St George's University Hospitals NHS Foundation Trust; St George's Institute for Infection & Immunity, Applied Diagnostic Research and Evaluation Unit |
| <b>Primary Subject Heading</b>: | Sexual health                                                                                                                                                                                                                                                                                                                                                                                                                                                                                                                                                                                                                                                                                                                                                                                |
| Secondary Subject Heading:      | Diagnostics, Health economics, Infectious diseases, Health services research                                                                                                                                                                                                                                                                                                                                                                                                                                                                                                                                                                                                                                                                                                                 |
| Keywords:                       | GENITOURINARY MEDICINE, HEALTH ECONOMICS, Health economics < HEALTH SERVICES ADMINISTRATION & MANAGEMENT, Molecular diagnostics < INFECTIOUS DISEASES, Genitourinary medicine < INTERNAL MEDICINE                                                                                                                                                                                                                                                                                                                                                                                                                                                                                                                                                                                            |
|                                 |                                                                                                                                                                                                                                                                                                                                                                                                                                                                                                                                                                                                                                                                                                                                                                                              |

SCHOLARONE™  
Manuscripts

1  
2  
3 **A modelling-based evaluation of the costs, benefits and cost-effectiveness of multi-pathogen point-**  
4 **of-care tests for sexually transmitted infections in symptomatic genitourinary medicine clinic**  
5 **attendees**  
6  
7  
8  
9

10 Susie E Huntington<sup>1</sup>, Richéal M Burns<sup>1</sup>, Emma Harding-Esch<sup>3,4</sup>, Michael J Harvey<sup>1</sup>, Rachel Hill-Tout<sup>5</sup>,  
11 Sebastian S Fuller<sup>4</sup>, \*Elisabeth J Adams<sup>1</sup>, \*S Tariq Sadiq<sup>3,4,5</sup>  
12  
13

- 14 1. Aquarius Population Health, 58a Highgate High Street, London, N6 5HX, UK
- 15 2. Health Economics and Policy Analysis Centre (HEPAC), NUI Galway, Ireland.
- 16 3. HIV/STI Department, National Infection Service, Public Health England, 61 Colindale Avenue,  
17 London, NW9 5EQ, UK
- 18 4. St George's Institute for Infection and Immunity, Applied Diagnostic Research and Evaluation Unit,  
19 University of London, Cranmer Terrace, London, SW17 0RE, UK
- 20 5. St George's University Hospitals NHS Foundation Trust, Blackshaw Road, Tooting, London, SW17  
21 0QT.  
22  
23  
24  
25  
26  
27

28 \*Joint senior authors.  
29

30  
31 Correspondence to: Dr Tariq Sadiq [ssadiq@sgul.ac.uk](mailto:ssadiq@sgul.ac.uk). Tel: 020 8725 5740/3355 Institute for Infection  
32 and Immunity, St George's, University of London, Cranmer Terrace, London, SW17 0RE, UK  
33  
34  
35  
36

37 Word Count: 3365  
38  
39  
40  
41  
42  
43  
44  
45  
46  
47  
48  
49  
50  
51  
52  
53  
54  
55  
56  
57  
58  
59  
60

## Abstract

**Objectives:** To quantify the costs, benefits and cost-effectiveness of three multi-pathogen point-of-care (POC) testing strategies for detecting common sexually transmitted infections (STIs) compared with standard laboratory testing.

**Design:** Modelling study.

**Setting:** Genitourinary medicine (GUM) services in England.

**Population:** A hypothetical cohort of 965,988 people, representing the annual number attending GUM services symptomatic of lower genitourinary tract infection.

**Interventions:** The decision tree model considered costs and reimbursement to GUM services associated with diagnosing and managing STIs. Three strategies using hypothetical point-of-care tests (POCTs) were compared to standard care (SC) using laboratory-based testing. The strategies were: A) dual POC test (POCT) for *Chlamydia trachomatis* (CT) and *Neisseria gonorrhoeae* (NG); B) triplex POCT for CT-NG and *Mycoplasma genitalium* (MG); C) quadruplex POCT for CT-NG-MG and *Trichomonas vaginalis* (TV). Data came from published literature and unpublished estimates.

**Primary and secondary outcome measures:** Primary outcomes were total costs and benefits (quality-adjusted life years [QALYs]) for each strategy (2016 GB £) and associated incremental cost-effectiveness ratios (ICERs) between each of the POC strategies and SC. Secondary outcomes were inappropriate treatment of STIs, onward STI transmission, pelvic inflammatory disease in women, time to cure and total attendances.

**Results:** In the base-case analysis, POC strategy C, a quadruplex POCT, was the most cost-effective relative to the other strategies, with an ICER of £36,585 per QALY gained compared to SC when using micro-costing, and cost-savings of £26,451,382 when using tariff costing. POC strategy C also generated the most benefits, with 240,467 fewer clinic attendances, 808 fewer onward STI transmissions, and 235,135 averted inappropriate treatments compared to SC.

**Conclusions:** Many benefits can be achieved by using multi-pathogen POCTs to improve STI diagnosis and management. Further evidence is needed on the underlying prevalence of STIs and SC delivery in the UK to reduce uncertainty in economic analyses.

1  
2  
3 Strengths and limitations of this study  
4

- 5 • The main strength of this study is that it presents the first estimates of the potential public  
6 health impact of multi-pathogen POCT strategies made possible by emerging diagnostic  
7 technologies.  
8
- 9 • The model used inputs from multiple sources including published studies, published data (for  
10 costs), national surveillance data plus expert opinion and in incorporated uncertainty in  
11 multiple input parameters by using a second order Monte Carlo PSA and numerous scenarios  
12 were assessed in sensitivity analysis.  
13
- 14 • The main limitations were the paucity of published data on treatment pathways including  
15 efficacy of treatment and gaps in treatment guidelines, which made building a representative  
16 SC pathway problematic. There were few published data for some input parameters, for  
17 example, the percentage of patients who are presumptively treated without a microbiological  
18 result, or percentage returning to clinics after initial treatment.  
19  
20  
21  
22  
23  
24  
25  
26  
27  
28  
29  
30  
31  
32  
33  
34  
35  
36  
37  
38  
39  
40  
41  
42  
43  
44  
45  
46  
47  
48  
49  
50  
51  
52  
53  
54  
55  
56  
57  
58  
59  
60



## Introduction

Continued high transmission rates of sexually transmitted infections (STIs) that cause treatable lower genital tract discharge syndromes (GDS) are a major public health concern. This causes significant reproductive-health long-term sequelae<sup>1-4</sup> and frequently necessitates empirical therapy to minimise treatment delay, which often results in misdirected treatment, poor antimicrobial stewardship and the spread of antimicrobial resistance.<sup>5,6</sup> Among the common causes of GDS, there were 107,252 and 39,696 diagnoses of *Chlamydia trachomatis* (CT) and *Neisseria gonorrhoeae* (NG), respectively, made in English genitourinary medicine (GUM) services in 2015<sup>7</sup>, with smaller numbers of *Trichomonas vaginalis* (TV) and *Mycoplasma genitalium* (MG) diagnoses.

The decision to give empirical antimicrobial therapy in symptomatic patients is usually guided by results of immediate microscopy of genital discharge, but this has low sensitivity, missing up to half of NG/TV infections in women<sup>8</sup> and particularly poor specificity for predicting CT or MG. Accurate routine diagnosis, which requires laboratory-based nucleic acid amplification tests (NAATs), can take up to two weeks for results to be processed and most GUM services do not routinely conduct NAATs for MG or TV. Many patients are presumptively treated with either azithromycin or doxycycline, which are effective against CT but respectively cure only two-thirds and one-third of MG infections<sup>9</sup> and neither antimicrobial is effective against TV.<sup>9</sup>

Emerging technologies are being developed that allow rapid and accurate point-of-care tests (POCTs) for multiple sexually transmitted infections, solutions which could address these challenges and help improve patient and public health outcomes. However, health services are under increasing financial pressure, and implementing new technologies may be prohibitively costly for both providers and commissioners of healthcare. There is currently only one commercially available rapid NAAT for CT and NG, which has equivalent performance to laboratory NAATs (Cepheid GeneXpert).<sup>10</sup> Previous economic evaluations of NAAT POCTs for CT and NG indicate that they are likely to provide a cost-effective strategy for screening GUM attendees.<sup>5,11</sup> To inform decision making by groups developing multi-pathogen POCTs and clinics which would likely use such tests, we assessed costs, benefits and cost-effectiveness of three testing strategies using hypothetical NAAT POCTs for A) CT-NG, B) CT-NG-MG and C) CT-NG-MG-TV compared with laboratory-based CT-NG NAAT testing.

## Methods

### Creating a model structure

A decision tree model was constructed using Microsoft Excel (v.2016) to simulate a hypothetical cohort of people with symptoms of a lower genitourinary tract infection attending English GUM services. The base-case or primary analysis, using assumptions provided in Supplementary Table 1, compared complete pathway costs of three point-of-care (POC) strategies to the current practice of using microscopy plus a laboratory CT-NG NAAT. The POC strategies used microscopy plus a hypothetical POCT that provides results in 30 minutes for A) CT-NG; B) CT-NG-MG; C) CT-NG-MG-TV. Microscopy was used in all POC strategies as it can detect other conditions and infections not covered by the POCTs, as well as diagnosing NG and TV. The strategies were chosen in response to recent developments in STI POCT technology, reflecting pathogen configurations and performance characteristics.<sup>12,13</sup>

### Outcomes

Primary outcomes were total costs and benefits, measured by quality adjusted life years (QALYs) for each strategy and associated incremental cost-effectiveness ratios (ICERs, see equation) between each of the POC strategies and standard care (SC). The ICER provides information on the additional cost per unit of additional benefit between an option and the next less expensive alternative.

$$ICER_x = \frac{Cost_{POC_x} - Cost_{Current Practice}}{QALY_{POC_x} - QALY_{Current Practice}}$$

Secondary outcomes assessed the wider health benefits and included inappropriate treatment of STIs (defined as unnecessary treatment of people with no STI plus incorrect treatment for people with an STI), onward transmission of the four STIs, pelvic inflammatory disease (PID), a serious complication of CT, NG and MG infections in women, time to cure and total GUM attendances.

### Patient pathways

Three senior clinicians at St George's University Hospitals NHS Foundation Trust, London outlined current and hypothetical POC pathways for symptomatic patients (Figure 1). We assumed that treatment pathways did not vary by subgroup but that MSM had diagnostic tests from three anatomical sites (genital, pharyngeal, and rectal) at initial visit and MSW and women only had genital swabs. The model accounted for single or dual infections with NG, CT, MG and/or TV.

1  
2  
3 The cost of treating PID, was included in the model but other long-term complications associated with  
4 STI infection (e.g. infertility) and adverse drug events associated with treatment were not considered.  
5  
6 The proportion of patients lost-to-follow-up (LTFU) was estimated. It was assumed that anyone  
7 remaining in follow-up consented to diagnostic testing and, if diagnosed, accepted treatment. The  
8 decision framework assumed that individuals had a maximum of three follow-up visits and then exited  
9 the model. Drug resistance was not considered. The time horizon for the model was 56 days. It was  
10 assumed that treatment was started on the day of diagnosis.  
11  
12  
13

#### 14 15 Epidemiology and clinical parameters

16  
17 A short online survey, distributed to members of the British Association for Sexual Health and HIV  
18 (BASHH), was used to collect data on the percentage of patients attending GUM services that are  
19 symptomatic, the percentage of patients returning after initial visits, as well as MG testing protocols,  
20 as limited data were available from published literature. The survey was completed by 23 GUM  
21 clinicians, 10 from London and 13 from elsewhere in the UK (Supplementary Table 2).  
22  
23  
24

25  
26 The total annual number of people attending English GUM services for STI testing was obtained from  
27 national surveillance data (GUMCAD 2015 data).<sup>7</sup> The number of GUM attendees who were  
28 symptomatic was then calculated using the median percentages reported in the clinician survey (50%  
29 of 1,181,574 for women; 40% of 647,661 for men-who-have-sex-with-women [MSW]; and 50% of  
30 232,274 for men-who-have-sex-with-men [MSM]). The model simulated a total of 965,988  
31 symptomatic attendees and by subgroup, 590,787 women, 259,064 MSW and 116,137 MSM. We  
32 assumed that hypothetical POCTs had similar sensitivity and specificity to the best performing  
33 currently available CT-NG POCTs.<sup>10</sup> The prevalence of CT, NG, MG and TV in GUM attendees (Table 1)  
34 was estimated using published studies and preliminary findings from the PRECISE Study<sup>14</sup>, a study  
35 evaluating POCTs conducted by St George's, University of London and Public Health England.  
36  
37  
38  
39  
40  
41  
42

#### 43 Patient and public involvement

44  
45 There was no involvement from patients or the public in the design of the evaluation.  
46  
47  
48  
49  
50  
51  
52  
53  
54  
55  
56  
57  
58  
59  
60

Table 1. Epidemiological and clinical parameters

| Variable                                             | Value |       |       | Distribution | Number                                                                   |         |         | Comments, Reference                                              |
|------------------------------------------------------|-------|-------|-------|--------------|--------------------------------------------------------------------------|---------|---------|------------------------------------------------------------------|
|                                                      | Women | MSW   | MSM   |              | Women                                                                    | MSW     | MSM     |                                                                  |
| 1 Initial clinic attendances                         | 61%   | 27%   | 12%   | Beta         | 590,787                                                                  | 259,064 | 116,137 | Clinician survey results                                         |
| 2 CT infection                                       | 6.5%  | 23.3% | 6.2%  | Beta         | 38,401                                                                   | 60,362  | 7,200   | W <sup>14,15,16</sup> ; MSW <sup>14,17</sup> ; MSM <sup>14</sup> |
| 3 NG infection                                       | 0.7%  | 3.4%  | 38.1% | Beta         | 4,136                                                                    | 8,808   | 44,248  | W <sup>14,15,16</sup> ; MSW <sup>14,17</sup> ; MSM <sup>14</sup> |
| 4 MG infection                                       | 4.2%  | 12.3% | 9.3%  | Beta         | 24,813                                                                   | 31,865  | 10,801  | W <sup>14</sup> ; MSW <sup>14,17</sup> ; MSM <sup>14</sup>       |
| 5 TV infection                                       | 4.4%  | 0.0%  | 0.0%  | Beta         | 25,995                                                                   | -       | -       | W <sup>14,15,16,18</sup> ; MSW <sup>14</sup> ; MSM estimate      |
| 6 CT NG co-infection                                 | 0.3%  | 2.2%  | 6.2%  | Beta         | 1,772                                                                    | 5,699   | 7,200   | W <sup>14,15</sup> ; MSW, MSM <sup>14</sup>                      |
| 7 CT MG co-infection                                 | 1.6%  | 2.8%  | 0.0%  | Beta         | 9,453                                                                    | 7,254   | -       | W, MSW, MSM <sup>14</sup>                                        |
| 8 CT TV co-infection                                 | 0.2%  | 0.0%  | 0.0%  | Beta         | 1,182                                                                    | -       | -       | W <sup>14,15,16</sup> ; MSW <sup>14</sup> ; MSM estimate         |
| 9 NG MG co-infection                                 | 0.6%  | 0.6%  | 1.0%  | Beta         | 3,545                                                                    | 1,554   | 1,161   | W, MSW, MSM <sup>14</sup>                                        |
| 10 NG TV co-infection                                | 0.4%  | 0.0%  | 0.0%  | Beta         | 2,363                                                                    | -       | -       | W <sup>16</sup> ; MSW <sup>14</sup> ; MSM estimate               |
| 11 MG TV co-infection                                | 1.0%  | 0.0%  | 0.0%  | Beta         | 5,908                                                                    | -       | -       | W <sup>14</sup> ; MSW, MSM estimate                              |
| 12 Sensitivity of microscopy for detecting NG        | 40%   | 75%   | 75%   | Uniform      | Estimate based on published studies and clinical experience <sup>8</sup> |         |         |                                                                  |
| 13 Specificity of microscopy for detecting NG        | 100%  | 100%  | 100%  | Uniform      | Estimate based on published studies and clinical experience <sup>8</sup> |         |         |                                                                  |
| 14 Sensitivity of microscopy for detecting TV        | 50%   | 50%   | 50%   | Uniform      | Assumption based on clinical experience                                  |         |         |                                                                  |
| 15 Specificity of microscopy for detecting TV        | 100%  | 100%  | 100%  | Uniform      | Assumption based on clinical experience                                  |         |         |                                                                  |
| 16 Sensitivity of current NAAT test for CT-NG        | 97%   | 97%   | 97%   | Uniform      | Typical of best-performing tests currently used <sup>19</sup>            |         |         |                                                                  |
| 17 Specificity of current NAAT test for CT-NG        | 97%   | 97%   | 97%   | Uniform      | Typical of best-performing tests currently used <sup>19</sup>            |         |         |                                                                  |
| 18 Sensitivity of POCTs for CT/NG/MG/TV              | 95%   | 95%   | 95%   | Uniform      | Estimate based on tests currently available <sup>10</sup>                |         |         |                                                                  |
| 19 Specificity of POCTs for CT/TV/MG                 | 96%   | 96%   | 96%   | Uniform      | Estimate based on tests currently available <sup>10</sup>                |         |         |                                                                  |
| 20 Specificity of POCTs for NG                       | 98%   | 98%   | 98%   | Uniform      | Estimate based on tests currently available <sup>10</sup>                |         |         |                                                                  |
| 21 CT infection - probability of PID                 | 16%   | -     | -     | Normal       | Estimate based on published studies <sup>2</sup>                         |         |         |                                                                  |
| 22 NG infection - probability of PID                 | 16%   | -     | -     | Normal       | Estimate based on published studies <sup>20</sup>                        |         |         |                                                                  |
| 23 MG infection - probability of PID                 | 4%    | -     | -     | Normal       | Estimate based on published studies <sup>1</sup>                         |         |         |                                                                  |
| 24 TV infection - probability of PID                 | 0%    | -     | -     | Normal       | Assumption                                                               |         |         |                                                                  |
| 25 Microscopy at first attendance                    | 84%   | 84%   | 84%   | Uniform      | Assumption, clinician survey results                                     |         |         |                                                                  |
| 26 Presumptive treatment for CT                      | 50%   | 50%   | 50%   | Normal       | Estimate based on clinical practice                                      |         |         |                                                                  |
| 27 Proportion of MG infections cured by CT treatment | 67%   | 67%   | 67%   | Uniform      | Estimate based on published studies <sup>9</sup>                         |         |         |                                                                  |

1  
2  
3  
4 CT, *Chlamydia trachomatis*; MG, *Mycoplasma genitalium*; MSM, men-who-have-sex-with-men; MSW, men-who-have-sex-with women; NAAT, nucleic acid  
5 amplification test; NG, *Neisseria gonorrhoea*; NGU, non-gonococcal urethritis; PID, pelvic inflammatory disease; POCT, point-of-care test; TV, *Trichomonas*  
6 *vaginalis*.  
7  
8  
9  
10  
11  
12  
13  
14  
15  
16  
17  
18  
19  
20  
21  
22  
23  
24  
25  
26  
27  
28  
29  
30  
31  
32  
33  
34  
35  
36  
37  
38  
39  
40  
41  
42  
43  
44  
45  
46  
47

For peer review only

### Cost and utility parameters

All costs are given in 2015/16 prices (GB, £) and inflated to 2015/16 costs when based on previous estimates using the Hospital and Community Health Services (HCHS) Inflation Indices 2015.<sup>21</sup> The model considered two perspectives for costs: 1) costs to GUM services (micro-costing) associated with testing and management of NG/CT/MG/TV infections plus the cost of treating PID<sup>22</sup> and 2) NHS tariff reimbursements clinics would receive based on attendances (Table 2). Micro-costing was calculated by adapting an existing pathway model<sup>23</sup> and includes the cost of staff time, diagnostic kit, drugs, and other consumables. The tariff, an estimated average first and follow-up attendance cost used for commissioning and cross-charging<sup>24</sup>, was estimated using the draft 2015/16 NHS tariff for first and follow-up GUM attendances. Fixed tariffs are not affected by how treatment is administered (oral/intramuscular) or the number of tests performed.

Table 2. Model input parameters: costs and utilities

| Utilities                                                                               |         |                                                                                                       |  |                             |
|-----------------------------------------------------------------------------------------|---------|-------------------------------------------------------------------------------------------------------|--|-----------------------------|
| Asymptomatic health state                                                               | 1.00    | Assume an otherwise healthy population                                                                |  |                             |
| Symptomatic health state                                                                | 0.93    |                                                                                                       |  | Sri, 2016 <sup>25</sup>     |
| Waiting for diagnosis (symptomatic) health state                                        | 0.93    | Assume the same as symptomatic                                                                        |  | Sri, 2016 <sup>25</sup>     |
| Treatment complete i.e. returned to asymptomatic state                                  | 1.00    | Assume they return to asymptomatic                                                                    |  |                             |
| PID diagnosis health state                                                              | 0.80    |                                                                                                       |  | Smith, 2008 <sup>26</sup>   |
| Costs                                                                                   |         |                                                                                                       |  |                             |
| Tariff cost of initial visit plus treatment management                                  | £141.00 | Draft National Tariff Payment System: 2015/16                                                         |  | <sup>24</sup>               |
| Initial clinic visit of symptomatic patient (micro-costing)                             | £103.71 | Patient pathway adapted from a previous model                                                         |  | Adams, 2014 <sup>a 23</sup> |
| Management of STI (oral medication) on same day as assessment <sup>b,c</sup>            | £29.19  | Excludes drug cost                                                                                    |  | Adams, 2014 <sup>a 23</sup> |
| Management of STI (oral medication) at return visit after results <sup>b,c</sup>        | £31.32  | Excludes drug cost                                                                                    |  | Adams, 2014 <sup>a 23</sup> |
| Management of STI (medication via injection) on same day as assessment <sup>c</sup>     | £43.79  | Excludes drug cost                                                                                    |  | Adams, 2014 <sup>a 23</sup> |
| Management of STI (medication via injection) on return visit after results <sup>c</sup> | £44.32  | Excludes drug cost and GC culture/typing lab processing                                               |  | Adams, 2014 <sup>a 23</sup> |
| Standard CT/NG NAAT laboratory diagnostic test <sup>d</sup>                             | £13.17  |                                                                                                       |  | Adams, 2014 <sup>a 23</sup> |
| POCT CT-NG <sup>d</sup>                                                                 | £24.00  | Assumption based on cost of products currently available                                              |  |                             |
| POCT CT-NG-MG <sup>d</sup>                                                              | £29.00  | Assumption based on cost of products currently available                                              |  |                             |
| POCT CT-NG-MG-TV <sup>d</sup>                                                           | £34.00  | Assumption based on cost of products currently available                                              |  |                             |
| Tariff cost of return visit                                                             | £110.00 | Draft National Tariff Payment System: 2015/16                                                         |  | <sup>24</sup>               |
| Return clinic visit of symptomatic patient (micro-costing)                              | £83.25  | Patient pathway adapted from a previous model                                                         |  | Adams, 2014 <sup>a 23</sup> |
| NG test of cure using standard NAAT laboratory test                                     | £41.73  |                                                                                                       |  | Adams, 2014 <sup>a 23</sup> |
| NG test of cure using POC A                                                             | £55.93  |                                                                                                       |  | Adams, 2014 <sup>a 23</sup> |
| Cost of drug treatment (1 <sup>st</sup> line) for CT                                    | £1.20   | Where 95% of patients receive 1g Azithromycin and 5% receive Doxycycline 100mg twice daily for 7 days |  | BNF, 2016 <sup>27</sup>     |
| Cost of drug treatment (1 <sup>st</sup> line) for NG                                    | £5.95   | Single dose Ceftriaxone 500mg deep intramuscular injection                                            |  | BNF, 2016 <sup>27</sup>     |

1  
2  
3  
4  
5  
6  
7  
8  
9  
10  
11  
12  
13  
14  
15  
16  
17  
18  
19  
20  
21  
22  
23  
24  
25  
26  
27  
28  
29  
30  
31  
32  
33  
34  
35  
36  
37  
38  
39  
40  
41  
42  
43  
44  
45  
46  
47

|                                                      |         |                                                                              |                             |
|------------------------------------------------------|---------|------------------------------------------------------------------------------|-----------------------------|
| Cost of drug treatment (1 <sup>st</sup> line) for MG | £1.87   | with single dose 1g Azithromycin<br>Doxycycline 100mg twice daily for 7 days | BNF, 2016 <sup>27</sup>     |
| Cost of drug treatment (1 <sup>st</sup> line) for TV | £0.36   | Metronidazole 2g orally in a single dose                                     | BNF, 2016 <sup>27</sup>     |
| Cost associated with treatment of short-term PID     | £180.52 |                                                                              | Aghaizu, 2011 <sup>22</sup> |

BNF, British National Formulary; CT, *Chlamydia trachomatis*; MG, *Mycoplasma genitalium*; NAAT, nucleic acid amplification test; NG, *Neisseria gonorrhoea*; PID, pelvic inflammatory disease; POC, point-of-care; TV, *Trichomonas vaginalis*.

<sup>a</sup>Costs were inflated to 2015/16 costs using the Hospital and Community Health Services (HCHS) Inflation Indices 2015 produced by the Personal Social Services Research Unit.<sup>21</sup> No data were available for inflation from 2014/15 to 2015/16 so it was assumed to be the same as between 2013/2014 and 2014/15. The UK consumer price index for health services shows similar annual growth in this sector from 2014 which validates this assumption.

<sup>b</sup>The cost of management of MG/TV infection is assumed to be the same as the costs associated with management of CT infection.

<sup>c</sup>These costs vary due to the difference in administrative staff time for patient registration if the patient is treated on the same day or on a subsequent visit.

<sup>d</sup>MSM have samples from three sites (urethral, rectal, pharyngeal) tested at the initial visit, whereas women and MSW typically have one sample taken.

Peer review only



1  
2  
3 Costs of implementing a change in practice, including training costs, were not considered. However,  
4 the unit costs used for staff time, which were considered, do incorporate the cost of training courses<sup>21</sup>.  
5  
6 Costs associated with testing and treating other causes of lower genitourinary tract symptoms were  
7 not considered.  
8

9  
10 Utilities, measures of health-related quality of life, were used in calculating QALYs for the health states  
11 (asymptomatic, symptomatic, or awaiting test results) incorporated in the decision analytic framework  
12 (Table 2).  
13

#### 14 15 Scenario and sensitivity analysis

16  
17 As well as the base-case analysis, 32 further scenarios were assessed deterministically i.e. where one  
18 or more key parameters were varied based on changing the assumption of that parameter(s) while  
19 holding all others at the base-case level (Supplementary Table 3). Scenarios included: higher STI  
20 prevalence; lower sensitivity and specificity of POCTs; differing microscopy use; cheaper POCTs; and  
21 different LTFU rates.  
22  
23

24  
25 We performed a second order Monte Carlo probabilistic sensitivity analysis (PSA), consistent with best  
26 practice, to estimate base-case ICERs. We converted model inputs from discrete values to  
27 distributions. For cost inputs, we used a normal distribution and varied each cost by 20% for the  
28 standard deviation. We correlated costs of POCTs against the least expensive option to ensure test  
29 costs would change equivalently to the same degree with each simulation. For clinical parameters, we  
30 used beta and normal distributions for probabilities and uniform distributions for test performance.  
31 For utilities, normal distributions were used. The PSA included 5000 simulations and was performed  
32 using recommended procedures<sup>28</sup>. Probabilities that strategies were cost-effective at a range of  
33 willingness-to-pay (WTP) thresholds per QALY gained were presented in cost-effectiveness  
34 acceptability curves (CEACs). CEACs were generated for each subgroup and the total population.  
35 Threshold costs for POCTs at which POC strategies would become cost-saving were calculated to the  
36 nearest £0.25.  
37  
38  
39  
40  
41  
42  
43  
44  
45  
46  
47  
48  
49  
50  
51  
52  
53  
54  
55  
56  
57  
58  
59  
60

## Results

Using micro-costing, the estimated annual cost of testing and managing CT, NG, MG and TV infections in 965,988 symptomatic individuals attending GUM was £113,058,655 using SC. This was the cheapest strategy to clinical services, with POC strategies A, B and C being increasingly expensive at £118,704,963 (5% increase), £124,842,003 (10.4% increase), and £125,313,136 (10.8% increase), respectively (Table 3). The opposite was true when using tariff costs, with SC being the most expensive for commissioners of sexual health care at £172,364,138, and POC strategy C being the least expensive, at £145,912,757 (Table 3).

For peer review only

Table 3. The costs, QALYs, average time to cure, inappropriate treatment and follow-up visits in SC and three POC strategies for symptomatic people attending GUM services

| Sub-group | Strategy | Model Outcomes              |                      |             |                             |                          |                              |                                   |                   |                    |
|-----------|----------|-----------------------------|----------------------|-------------|-----------------------------|--------------------------|------------------------------|-----------------------------------|-------------------|--------------------|
|           |          | Total costs (micro-costing) | Total costs (tariff) | Total QALYs | Average time to cure (days) | Inappropriate treatments | Mean number of visits/person | Return clinic visits <sup>1</sup> | Infected partners | PID cases in women |
| All       | SC       | £113,058,655                | £172,364,138         | 146,532     | 4.3                         | 258,395                  | 1.3                          | 328,726                           | 1,876             | 176                |
|           | POC A    | £118,704,963                | £151,956,910         | 146,656     | 2.3                         | 109,135                  | 1.1                          | 143,205                           | 1,414             | 119                |
|           | POC B    | £124,842,003                | £152,288,107         | 146,626     | 2.1                         | 200,865                  | 1.2                          | 146,216                           | 1,451             | 64                 |
|           | POC C    | £125,313,136                | £145,912,757         | 146,867     | 1.1                         | 23,260                   | 1.1                          | 88,259                            | 1,068             | 64                 |
| Women     | SC       | £65,122,097                 | £99,714,696          | 89,533      | 4.4                         | 176,604                  | 1.3                          | 149,216                           | 764               | 176                |
|           | POC A    | £66,938,018                 | £88,960,028          | 89,584      | 2.4                         | 76,322                   | 1.1                          | 51,446                            | 524               | 119                |
|           | POC B    | £69,853,645                 | £89,101,615          | 89,554      | 2.2                         | 128,806                  | 1.1                          | 52,733                            | 535               | 64                 |
|           | POC C    | £69,285,504                 | £85,008,982          | 89,718      | 1.1                         | 1,607                    | 1.0                          | 15,528                            | 260               | 64                 |
| MSW       | SC       | £29,572,989                 | £46,813,874          | 39,342      | 4.3                         | 54,860                   | 1.4                          | 93,507                            | 459               | -                  |
|           | POC A    | £29,995,704                 | £40,111,202          | 39,389      | 2.1                         | 20,957                   | 1.1                          | 32,574                            | 343               | -                  |
|           | POC B    | £31,717,478                 | £40,614,444          | 39,380      | 2.0                         | 54,863                   | 1.1                          | 37,149                            | 360               | -                  |
|           | POC C    | £31,373,674                 | £38,724,875          | 39,443      | 1.2                         | 13,218                   | 1.1                          | 19,971                            | 285               | -                  |
| MSM       | SC       | £18,363,569                 | £25,835,568          | 17,658      | 4.1                         | 26,931                   | 1.7                          | 86,002                            | 653               | -                  |
|           | POC A    | £21,771,241                 | £22,885,680          | 17,684      | 2.3                         | 11,855                   | 1.5                          | 59,185                            | 546               | -                  |
|           | POC B    | £23,270,880                 | £22,572,047          | 17,692      | 1.5                         | 17,196                   | 1.5                          | 56,334                            | 556               | -                  |
|           | POC C    | £24,653,958                 | £22,178,900          | 17,706      | 1.2                         | 8,436                    | 1.5                          | 52,760                            | 524               | -                  |

<sup>1</sup>Return clinic visit for results and treatment, a test of cure (routine for NG) or because they remain symptomatic.

MSW, men-who-have-sex-with-women; MSM, men-who-have-sex-with-men; POC, point-of-care; PID, pelvic inflammatory disease; QALY, quality-adjusted life year.

Most of the total care pathway cost was the initial attendance cost. In SC, total pathway costs for women were £65,122,097, of this 93% (£60,432,050) were initial attendance costs. For POC strategy C, total pathway costs for women were £69,285,504, of which 98% (£68,041,383) were initial attendance costs.

POC strategy C provided most benefits to the full cohort. POC strategies A, B, and C increased QALYs by 124, 94 and 335, respectively compared to SC (Table 3 and Table 4). Time to cure was shorter and the number of total clinic visits, onward STI transmissions and PID cases were fewer in POC strategies than in SC. Compared to SC, POC strategy C resulted in 240,467 fewer clinic visits, 808 fewer onward STI transmissions, 235,135 averted inappropriate treatments and 112 fewer cases of PID.

Table 4. Cost differences for SC and POC strategies

| Sub-group | Comparison  | QALY difference | Micro-costing   |                      | Tariff costs    |                      |
|-----------|-------------|-----------------|-----------------|----------------------|-----------------|----------------------|
|           |             |                 | Cost difference | ICER (£/QALY gained) | Cost difference | ICER (£/QALY gained) |
| All       | POC A vs SC | 124             | £5,646,309      | £45,516              | -£20,407,228    | <b>Cost-Saving</b>   |
|           | POC B vs SC | 94              | £11,783,348     | £125,197             | -£20,076,031    | <b>Cost-Saving</b>   |
|           | POC C vs SC | 335             | £12,254,482     | £36,585              | -£26,451,382    | <b>Cost-Saving</b>   |
|           | POC B vs A  | -30             | £6,137,039      | <b>Dominated</b>     | £331,197        | <b>Dominated</b>     |
|           | POC C vs B  | 241             | £471,133        | £1,956               | -£6,375,350     | <b>Cost-Saving</b>   |
| Women     | POC A vs SC | 51              | £1,815,921      | £35,608              | -£10,754,668    | <b>Cost-Saving</b>   |
|           | POC B vs SC | 21              | £4,731,548      | £222,568             | -£10,613,081    | <b>Cost-Saving</b>   |
|           | POC C vs SC | 185             | £4,163,407      | £22,448              | -£14,705,715    | <b>Cost-Saving</b>   |
|           | POC B vs A  | -30             | £2,915,627      | <b>Dominated</b>     | £141,587        | <b>Dominated</b>     |
|           | POC C vs B  | 164             | -£568,141       | <b>Cost-Saving</b>   | -£4,092,634     | <b>Cost-Saving</b>   |
| MSW       | POC A vs SC | 47              | £422,715        | £9,005               | -£6,702,672     | <b>Cost-Saving</b>   |
|           | POC B vs SC | 38              | £2,144,488      | £56,104              | -£6,199,430     | <b>Cost-Saving</b>   |
|           | POC C vs SC | 102             | £1,800,685      | £17,724              | -£8,088,999     | <b>Cost-Saving</b>   |
|           | POC B vs A  | -9              | £1,721,773      | <b>Dominated</b>     | £503,242        | <b>Dominated</b>     |
|           | POC C vs B  | 63              | -£343,804       | <b>Cost-Saving</b>   | -£1,889,570     | <b>Cost-Saving</b>   |
| MSM       | POC A vs SC | 26              | £3,407,672      | £130,508             | -£2,949,888     | <b>Cost-Saving</b>   |
|           | POC B vs SC | 35              | £4,907,312      | £141,683             | -£3,263,521     | <b>Cost-Saving</b>   |
|           | POC C vs SC | 48              | £6,290,390      | £131,319             | -£3,656,668     | <b>Cost-Saving</b>   |
|           | POC B vs A  | 9               | £1,499,639      | £175,909             | -£313,633       | <b>Cost-Saving</b>   |
|           | POC C vs B  | 13              | £1,383,078      | £104,258             | -£393,147       | <b>Cost-Saving</b>   |

ICER, incremental cost-effectiveness ratios; MSW, men-who-have-sex-with-women; MSM, men-who-have-sex-with-men; POC, point-of-care; QALY, quality-adjusted life year.

1  
2  
3 ICERs associated with the base-case model are presented in Table 4. POC C highlights cost-  
4 effectiveness relative to other strategies yielding an ICER of £36,585 per QALY gained compared to SC  
5 when using micro-costing estimates. When incorporating NHS tariff costing, this represents a potential  
6 cost-savings of £26,451,382 relative to current practice.  
7  
8

9  
10 CEACs are presented in Figure 2. Using micro-costing, for a WTP of £30,000/QALY, the upper threshold  
11 adopted by NICE <sup>29</sup>, SC had a 50% probability of being cost-effective overall, a 17% probability for  
12 women, a 2% probability for MSW and a 99% probability for MSM, relative to the POC strategies. For a  
13 WTP of £25,000, POC C dominates, i.e. is cheaper and yields more benefits than the other POC  
14 strategies for the total cohort, women and MSW. For MSM, SC dominates all strategies across the  
15 thresholds examined. For MSW, POC A had 65% probability of being cost-effective at a WTP threshold  
16 of £10,000 per QALY gained.  
17  
18

19  
20 Results of 32 scenario analyses are summarised in Supplementary Tables 4-7. The proportion of  
21 patients given presumptive treatment (scenarios 21-24) impacted costs hugely. When no presumptive  
22 treatment was given (scenario 21), the cost per QALY was £7,339 and £9,092 more than SC for POC  
23 strategies B and C respectively, whilst POC strategy A was dominated by SC. When all patients without  
24 a diagnosis were presumptively treated for CT, MG or TV, according to which infections had been  
25 ruled out (scenario 24), POC strategies A and C were dominated by SC and POC strategy B cost  
26 £64,300/QALY more than SC.  
27  
28

29  
30 When the utility score for being symptomatic was 10% less than base-case (scenario 25), cost per  
31 QALY was £15,627 more for POC strategy C than for SC. If microscopy was no longer used in POC  
32 strategies (scenario 13), cost per QALY was £16,204 and £29,594 more than SC for POC strategies B  
33 and C respectively, whilst POC strategy A was dominated by SC.  
34  
35

36  
37 If MG and TV prevalence were as high as the estimated prevalence in the US <sup>30,31</sup> (scenario 2), cost per  
38 QALY was £20,530 and £25,548 more than SC for POC strategies B and C respectively, whilst POC  
39 strategy A was dominated by SC. When POCTs were priced the same as the SC test (scenario 31), POC  
40 strategies B and C were cost-saving (using micro-costing).  
41  
42

43  
44 Holding all other parameters constant using base-case assumptions, POC strategies would be cost-  
45 saving compared to SC, if POCTs cost £19.25, £13.50 and £21.00, respectively for POCTs A, B and C.  
46  
47  
48  
49  
50  
51  
52  
53  
54  
55  
56  
57  
58  
59  
60

## DISCUSSION

### Principle findings

This study compared costs, benefits and cost-effectiveness of a laboratory-based CT-NG NAAT, with three POC strategies for: A) CT-NG; B) CT-NG-MG; C) CT-NG-MG-TV. Using our initial assumptions for the total population using the micro-costing approach to assess direct costs to health-care services, each POC strategy cost more than SC, but yielded additional benefits. The proportion of patients given presumptive treatment and the cost of the POCT kit both impacted the costs hugely. Results indicated that different strategies would be cost-effective for different patient sub-groups depending on the WTP threshold in place. POC strategy A was most cost-effective for MSW, POC strategy C for women, and SC for MSM. Whether using different testing strategies on different patient groups would be practical or acceptable was beyond the scope of this research and requires further investigation. Different results were obtained when tariff reimbursement costs were used, with POC strategy C costing the least and providing the most benefits.

### Strengths and weaknesses

Our analysis has several strengths. This is the first study to compare the cost-effectiveness of the three different STI POC strategies with SC. Comparable and consistent methods were used to construct a model with inputs from multiple sources including published studies, published data (for costs), national surveillance data plus expert opinion. The model incorporated uncertainty in multiple input parameters by using a second order Monte Carlo PSA and numerous scenarios were assessed in sensitivity analysis.

Potential limitations should be considered. While it is thought that most UK clinicians follow British Association for Sexual Health and HIV (BASHH) guidelines for STI testing and treatment<sup>9,19</sup>, there is diversity in the testing and management strategies employed to meet specific patient needs, both within and between clinics. This diversity, the paucity of published data on treatment pathways and gaps in treatment guidelines, made building a representative SC pathway problematic. There were few published data for some input parameters, for example, the percentage of patients who are presumptively treated without a microbiological result, the percentage returning to clinics after initial treatment and the percentage of patients attending with symptoms – all parameters which are likely to vary somewhat between clinics. We tried to overcome this using different scenario analysis and by collecting data using an online survey for GUM clinicians, albeit from a small sample size. Data from the survey showed high variation between clinics for some parameters. For example, the percentage of patients attending with symptoms ranged from 0% to 90%. There were few published data on

1  
2  
3 utilities and sexual behaviour whilst symptomatic with an STI, whilst waiting for test results and whilst  
4 being on treatment for an STI. Both qualitative and quantitative research is needed in this area to  
5 inform future health economic analyses and to understand preferences for and impact on patients of  
6 introducing POC testing.  
7  
8

9  
10 The staffing and consumable cost data used in the model were average costs. In reality, different sites  
11 use staff of different grades and salaries to perform similar tasks and negotiate different costs for  
12 consumables, implying an inevitable variation in how cost effective the different strategies would be  
13 for different sites.  
14  
15

16  
17 The costs associated with long-term complications of STIs were not considered<sup>32</sup>. This limitation  
18 means that the results are conservative, as the costs associated with SC are likely to be  
19 underestimated. However, the long-term benefits for a single round of testing were thought to be very  
20 low and to not have a major impact on the magnitude of results.  
21  
22

23  
24 Comparing the results to other studies. POC pathways generated some cost savings, primarily because  
25 patients had fewer return visits. However, these did not outweigh the higher cost of the POCTs  
26 compared to laboratory-based NAATs when estimating total pathway costs. This means that if POC  
27 testing was used, there would be expected overall cost increases based on the analysis using the  
28 micro-costing approach. This differs from previous modelling, in which a CT-NG POCT was cost saving  
29 compared to laboratory testing<sup>5</sup>. In the Turner *et al.* model, the cost of a POC attendance was £6.95  
30 cheaper than the cost of an SC attendance since the asymptomatic POC pathway was redesigned. In  
31 our model, the cost of attendance for a symptomatic patient was the same whether samples were  
32 sent to a laboratory or performed in clinic, since all symptomatic clinic attendees would require  
33 examination and microscopy.  
34  
35  
36  
37  
38  
39  
40  
41

42 Implications for public health, clinicians and people using GUM services

43  
44 POC strategy C significantly decreased the numbers of inappropriate antibiotics given compared to SC,  
45 with over 235,000 fewer inappropriate treatments. Many of these treatments are likely to include  
46 azithromycin, which when inappropriately given can encourage spread of macrolide antibiotic  
47 resistance in MG infections<sup>6</sup>. POC strategy C also increased costs for health providers while decreasing  
48 tariff costs for commissioners, unless the “freed-up” capacity enabled by POC strategy C was used for  
49 STI screening appointments and initial assessments for symptomatic people. Although this would likely  
50 have a positive impact on public health, given GUM services in England face increasing pressure on  
51 their services with more than 2 million new attendances annually<sup>7</sup>, while local authorities equally face  
52 fiscal pressures, this work demonstrates the potential tensions between different cost-consequences  
53  
54  
55  
56  
57  
58  
59

1  
2  
3 for procurers and providers and public health benefits when considering implementation of novel  
4 health technologies. Whilst there are no triplex or quadruplex POC STI tests currently on the market,  
5 there is a least one multiplex STI POC assay in development.<sup>33</sup>  
6  
7

8 For people using GUM services, there are numerous benefits to POC testing compared to SC. People  
9 would need fewer clinic visits, saving them time and reducing LTFU and reducing their costs such as  
10 out-of-pocket expenses and productivity losses. Receiving a diagnosis at the initial attendance reduces  
11 anxiety compared to waiting for test results<sup>25</sup>. A negative result from a multi-pathogen POCT will  
12 support the development of clearer guidelines for clinicians, which could also reassure patients,  
13 particularly those with vague genital tract symptoms. Receiving effective treatment at initial  
14 attendance is likely to reduce the duration of symptoms and reproductive health sequelae.<sup>1,2</sup>  
15  
16  
17  
18  
19

20 POCTs can also generate public health benefits from swifter diagnosis and treatment, for example,  
21 POC strategy C led to an estimated 43% fewer onward transmissions of STIs compared to SC. The  
22 ability to diagnose or rule out specific infections at first attendance enables accurate treatment and  
23 reduces inappropriate antibiotic use, crucial for good antibiotic stewardship, the economic benefits of  
24 which are substantial and well documented.<sup>34</sup>  
25  
26  
27  
28  
29

### 30 Unanswered questions and future research

31 Although a rapid test for CT and NG is used in some GUM services, multi-pathogen configurations of  
32 CT-NG-MG-TV POCTs are not currently available. As such, likely pathways for POC strategies had to be  
33 designed based on expert opinion. Published audits of GUM patient pathways would be a useful  
34 addition to the literature. To reduce uncertainty in economic analyses around STIs, further evidence is  
35 also needed on underlying STI prevalence and the risk of onward STI transmission.  
36  
37  
38  
39

40 Patient pathways and testing protocols vary between sites and different sites see different  
41 proportions of people from the three sub-groups. As such, the costs of changing to a POC strategy will  
42 vary between sites as will the benefits and costs not considered in the model. Validated and easy to  
43 use computational tools for clinics and commissioners, which assess the economic impact of  
44 implementing any one of the POC strategies, using local population data, would increase  
45 understanding across stakeholders.  
46  
47  
48  
49  
50

### 51 Conclusion

52 In conclusion, the results suggest that although potentially more expensive, a quadruplex test for CT-  
53 NG-MG-TV is more cost-effective than SC and the other testing strategies assessed, providing the most  
54  
55  
56  
57  
58  
59  
60



1  
2  
3 additional benefits to patients. Cost implications are driven by the cost of POCTs and would vary  
4 somewhat in different geographical areas due to differences in the subgroup mix and the prevalence  
5 of the four STIs.  
6  
7

## 8 9 **Footnotes**

10  
11 We thank Dr Hamish Mohammed, Principal Scientist (STI Epidemiology) at Public Health England for  
12 providing data and support interpreting GUMCAD data.  
13  
14

15  
16 Contributors: All authors were involved in the conception and design of the research. STS, EHE, RHT  
17 and SSF provided input into current clinical practice relating to patient pathways in GUM. SEH  
18 estimated all parameter inputs and drafted the manuscript with support from EJA and MJH. RMB  
19 developed the model with input from EJA, SEH and MJH. All authors contributed to the interpretation  
20 of the model and approved the final version. STS acts as guarantor of the study.  
21  
22  
23

24  
25 Competing interests: All authors have completed the Unified Competing Interest Form and declare  
26 financial support from Innovate UK; EJA, SEH, MJH are employees of Aquarius Population Health (APH)  
27 which reports grants from Innovate UK grant to Atlas Genetics, during the conduct of the study; other  
28 from Cepheid, St Georges University of London, Enigma Diagnostics, and AstraZeneca, on STI and POC  
29 research outside the submitted work; RHB is a Lecturer and Programme Director of Economics at St.  
30 Angela's College Sligo/ NUI Galway and an academic staff member of the Health Economics and Policy  
31 Analysis Centre (HEPAC) at NUI Galway, providing health economic support to Aquarius Population  
32 Health on an ad-hoc consultancy basis. STS, EHE, SSF are members of the Applied Diagnostic Research  
33 and Evaluation Unit at St George's, University of London, which has received funding from Atlas  
34 Genetics, Alere, Cepheid, SpeeDx and Sekisui. STS has received NIHR funding to develop a POCT with  
35 Atlas.  
36  
37  
38  
39  
40  
41  
42

43  
44 Funding: This work was supported by Innovate UK SBRI grant no. 971452, awarded to Atlas Genetics  
45 Ltd. Atlas Genetics and Innovate UK had no role in the study design; in the collection, analysis, and  
46 interpretation of data; in the writing of the report; and in the decision to submit the article for  
47 publication.  
48  
49

50 Ethical approval: Not required.

51  
52 All authors had full access to the data (including statistical reports and tables) in the study and can  
53 take responsibility for the integrity of the data and the accuracy of the data analysis.  
54  
55  
56  
57  
58  
59  
60

1  
2  
3  
4  
5  
6  
7  
8  
9  
10  
11  
12  
13  
14  
15  
16  
17  
18  
19  
20  
21  
22  
23  
24  
25  
26  
27  
28  
29  
30  
31  
32  
33  
34  
35  
36  
37  
38  
39  
40  
41  
42  
43  
44  
45  
46  
47  
48  
49  
50  
51  
52  
53  
54  
55  
56  
57  
58  
59  
60

Transparency: The senior author (STS) affirms that the manuscript is an honest, accurate, and transparent account of the study being reported, that no important aspects of the study have been omitted, and that any discrepancies from the study as planned (and, if relevant, registered) have been explained.

Data sharing: no additional data available.

For peer review only

## References

- 1 Oakeshott P, Aghaizu A, Hay P, *et al.* Is *Mycoplasma genitalium* in women the “New Chlamydia?” A community-based prospective cohort study. *Clin Infect Dis* 2010;51:1160–6.
- 2 Price MJ, Ades AE, De Angelis D, *et al.* Risk of pelvic inflammatory disease following *Chlamydia trachomatis* infection: analysis of prospective studies with a multistate model. *Am J Epidemiol* 2013;178:484–92.
- 3 Liu B, Roberts CL, Clarke M, *et al.* Chlamydia and gonorrhoea infections and the risk of adverse obstetric outcomes: a retrospective cohort study. *Sex Transm Infect* 2013;89:672–8.
- 4 Hitti J, Garcia P, Totten P, *et al.* Correlates of cervical *Mycoplasma genitalium* and risk of preterm birth among Peruvian women. *Sex Transm Dis* 2010;37:81–5.
- 5 Turner KME, Round J, Horner P, *et al.* An early evaluation of clinical and economic costs and benefits of implementing point of care NAAT tests for *Chlamydia trachomatis* and *Neisseria gonorrhoea* in genitourinary medicine clinics in England. *Sex Transm Infect* 2013;sextrans-2013-051147.
- 6 Jensen JS, Bradshaw C. Management of *Mycoplasma genitalium* infections - can we hit a moving target? *BMC Infect Dis* 2015;15:343.
- 7 Public Health England. Sexually transmitted infections (STIs): annual data tables, 2006-2015. Public Health England [www.gov.uk/government/statistics/sexually-transmitted-infections-stis-annual-data-tables](http://www.gov.uk/government/statistics/sexually-transmitted-infections-stis-annual-data-tables) (accessed 20 Sep 2016).
- 8 Thorley N, Radcliffe K. The performance and clinical utility of cervical microscopy for the diagnosis of gonorrhoea in women in the era of the NAAT. *Int J STD AIDS* 2015;26:656–60.
- 9 Horner P, Blee K, O’Mahony C, *et al.* 2015 UK National Guideline on the management of non-gonococcal urethritis. *Int J STD AIDS* 2016;27:85–96.
- 10 Herbst de Cortina S, Bristow CC, Joseph Davey D, *et al.* A Systematic Review of Point of Care Testing for *Chlamydia trachomatis*, *Neisseria gonorrhoeae*, and *Trichomonas vaginalis*. *Infect Dis Obstet Gynecol* 2016;4386127.
- 11 Huang W, Gaydos CA, Barnes MR, *et al.* Comparative effectiveness of a rapid point-of-care test for detection of *Chlamydia trachomatis* among women in a clinical setting. *Sex Transm* 2013;89:108–14.
- 12 Atlas Genetics. Atlas Genetics wins SBRI grant from Innovate UK. 2016. <http://atlasgenetics.com/130-atlas-genetics-wins-sbri-grant-from-innovate-uk>
- 13 Harding-Esch, EM, Fuller, SS, Chow, C, *et al.* Performance of a prototype chlamydia and gonorrhoea recombinase polymerase amplification point-of-care test in three sexual health clinics. In: *Eighth Meeting of the European Society for Chlamydia Research*. Oxford, UK: 2016. [www.escr2016.co.uk/programme.pdf](http://www.escr2016.co.uk/programme.pdf) (Accessed 4 Jan 2017).
- 14 S Tariq Sadiq personal communication. PRECISE preliminary results. 2016.

- 15 Shone J, Winter A, Jones BL, *et al*. A Scottish multi-centre service evaluation examining the prevalence and diagnosis of *Trichomonas vaginalis* in symptomatic women attending sexual health clinics. *Int J STD AIDS* Published Online First: 30 September 2015. doi:10.1177/0956462415606850
- 16 Nathan B, Appiah J, Saunders P, *et al*. Microscopy outperformed in a comparison of five methods for detecting *Trichomonas vaginalis* in symptomatic women. *Int J STD AIDS* 2015;**26**:251–6. doi:10.1177/0956462414534833
- 17 Chalker VJ, Jordan K, Ali T, *et al*. Real-time PCR detection of the mg219 gene of unknown function of *Mycoplasma genitalium* in men with and without non-gonococcal urethritis and their female partners in England. *J Med Microbiol* 2009;**58**:895–9. doi:10.1099/jmm.0.009977-0
- 18 Lord E, Newnham T, Dorrell L, *et al*. Detecting asymptomatic *Trichomonas vaginalis* in females using the BD ProbeTec™ *Trichomonas vaginalis* Qx nucleic acid amplification test. *Int J STD AIDS* Published Online First: 5 May 2016. doi:10.1177/0956462416649888
- 19 Nwokolo NC, Dragovic B, Patel S, *et al*. 2015 UK national guideline for the management of infection with *Chlamydia trachomatis*. *Int J STD AIDS* 2016;**27**:251–67.
- 20 Reekie J, Donovan B, Guy R, *et al*. Hospitalisations for pelvic inflammatory disease temporally related to a diagnosis of *Chlamydia* or gonorrhoea: a retrospective cohort study. *PLoS One* 2014;**9**:e94361. doi:10.1371/journal.pone.0094361
- 21 PSSRU | Unit Costs of Health and Social Care 2015. [www.pssru.ac.uk/project-pages/unit-costs/2015/](http://www.pssru.ac.uk/project-pages/unit-costs/2015/) (accessed 29 Sep 2016).
- 22 Aghaizu A, Adams EJ, Turner K, *et al*. What is the cost of pelvic inflammatory disease and how much could be prevented by screening for *Chlamydia trachomatis*? Cost analysis of the Prevention of Pelvic Infection (POPI) trial. *Sex Trans* 2011;**87**:312–7.
- 23 Adams EJ, Ehrlich A, Turner KME, *et al*. Mapping patient pathways and estimating resource use for point of care versus standard testing and treatment of chlamydia and gonorrhoea in genitourinary medicine clinics in the UK. *BMJ Open* 2014;**4**.
- 24 Monitor. 2016/17 National Tariff Payment System: draft prices. 2016. [www.gov.uk/government/publications/201617-national-tariff-payment-system-draft-prices](http://www.gov.uk/government/publications/201617-national-tariff-payment-system-draft-prices) (accessed 21 Jun 2016).
- 25 Sri T, Southgate E, Kerry SR, *et al*. Health-related quality of life and *Chlamydia trachomatis* infection in sexually experienced female inner-city students: a community-based cross-sectional study. *Int J STD AIDS* Published Online First: 6 May 2016.
- 26 Smith KJ, Tsevat J, Ness RB, *et al*. Quality of life utilities for pelvic inflammatory disease health states. *Sex Transm Dis* 2008;**35**:307–11.
- 27 BNF September 2016. <https://www.evidence.nhs.uk/formulary/bnf/current> (accessed 29 Sep 2016).
- 28 Briggs AH, Weinstein MC, Fenwick EA, *et al*. Model parameter estimation and uncertainty analysis a report of the ISPOR-SMDM Modelling Good Research Practices Task Force Working Group–6. *Med Decis Making* 2012;**32**:722–32.

- 1  
2  
3 29 National Institute for Health and Care Excellence. Judging whether public health interventions  
4 offer value for money. 2013. [www.nice.org.uk/advice/lgb10/chapter/judging-the-cost-](http://www.nice.org.uk/advice/lgb10/chapter/judging-the-cost-effectiveness-of-public-health-activities)  
5 [effectiveness-of-public-health-activities](http://www.nice.org.uk/advice/lgb10/chapter/judging-the-cost-effectiveness-of-public-health-activities) (accessed 31 Oct 2017).  
6  
7 30 Getman D, Jiang A, O'Donnell M, *et al*. Mycoplasma genitalium Prevalence, Coinfection, and  
8 Macrolide Antibiotic Resistance Frequency in a Multicenter Clinical Study Cohort in the United  
9 States. *J Clin Microbiol* 2016;54:2278–83.  
10  
11 31 Alcaide ML, Feaster DJ, Duan R, *et al*. The incidence of Trichomonas vaginalis infection in women  
12 attending nine sexually transmitted diseases clinics in the USA. *Sex Transm Infect* 2016;92:58–62.  
13  
14 32 Davies B, Turner KME, Frølund M, *et al*. Risk of reproductive complications following chlamydia  
15 testing: a population-based retrospective cohort study in Denmark. *Lancet Infect Dis* Published  
16 Online First: 8 June 2016.  
17  
18 33 Khalil S. Innovate UK gives Atlas Genetics £2m contract for rapid diagnostic platform. Digital  
19 Health Online News Article 17 August 2017. [www.digitalhealth.net/2017/08/atlas-genetics-](http://www.digitalhealth.net/2017/08/atlas-genetics-awarded-2m-innovate-uk-contract)  
20 [awarded-2m-innovate-uk-contract](http://www.digitalhealth.net/2017/08/atlas-genetics-awarded-2m-innovate-uk-contract) (accessed 6 April 2018)  
21  
22 34 Smith R, Coast J. The true cost of antimicrobial resistance. *BMJ* 2013;346:f1493.  
23  
24  
25  
26  
27  
28  
29  
30  
31  
32  
33  
34  
35  
36  
37  
38  
39  
40  
41  
42  
43  
44  
45  
46  
47  
48  
49  
50  
51  
52  
53  
54  
55  
56  
57  
58  
59  
60

Figure 1. Diagram showing simplified patient flow through the model

**Standard care (SC):** 50% of people not diagnosed with NG or TV by microscopy will be presumptively treated for CT. The treatment is effective against CT, 67% of MG<sup>9</sup>, and against all other non-specific bacterial STIs (i.e. not CT/NG/MG/TV). We assume this treatment is not effective against TV or NG. Incorrectly treated patients with NG infection will be diagnosed by NAAT, and return (minus those LTFU) to receive treatment. Other returning patients may receive presumptive treatment for MG and TV.

**POC strategy A:** 50% of people not diagnosed by microscopy or POCT would be presumptively treated for MG and TV. We assume that this treatment is effective against CT, MG, TV, and against all other non-specific bacterial STIs. We assume that this treatment is not effective against NG. Patients not initially presumptively treated but who return to the clinic are then presumptively treated with MG and TV treatment.

**POC strategy B:** 50% of people not diagnosed by microscopy or POCT would be presumptively treated for TV. We assume this treatment is effective against TV, and against all other non-specific bacterial STIs. We assume this treatment is not effective against CT, MG, or NG.

**POC strategy C:** 100% of people who are not diagnosed by microscopy or POC would be presumptively treated using azithromycin. We assume this treatment is effective against CT, 67% of MG<sup>9</sup>, and against all other non-specific bacterial STIs. We assume this treatment is not effective against TV or NG. If any treated patients return they will be categorised as 'investigate further'. The cost of the 'investigate further' is the cost of a standard return appointment which includes microscopy.

1  
2  
3 Figure 2. Cost-effectiveness acceptability curves (CEACs): point-of-care test (POCT) strategies vs  
4 standard care

5  
6 Footnote: MSM, men who have sex with men; MSW men who have sex with women; W, women.  
7  
8  
9  
10  
11  
12  
13  
14  
15  
16  
17  
18  
19  
20  
21  
22  
23  
24  
25  
26  
27  
28  
29  
30  
31  
32  
33  
34  
35  
36  
37  
38  
39  
40  
41  
42  
43  
44  
45  
46  
47  
48  
49  
50  
51  
52  
53  
54  
55  
56  
57  
58  
59  
60

For peer review only

1  
2  
3  
4  
5  
6  
7  
8  
9  
10  
11  
12  
13  
14  
15  
16  
17  
18  
19  
20  
21  
22  
23  
24  
25  
26  
27  
28  
29  
30  
31  
32  
33  
34  
35  
36  
37  
38  
39  
40  
41  
42  
43  
44  
45  
46  
47  
48  
49  
50  
51  
52  
53  
54  
55  
56  
57  
58  
59  
60



Figure 1.

338x190mm (300 x 300 DPI)

Review only





Figure 2 Cost-effectiveness acceptability curves (CEACs): point-of-care test (POCT) strategies vs standard care

596x309mm (300 x 300 DPI)

review only

Supplementary Table 1. Key model assumptions

- 1 The decision framework assumes that after a maximum of 3 courses of treatment the individual would be cured. In standard care, this could take up to 56 days in total; therefore, the cycle length is one day and time horizon is 56 days.
- 2 Screening options will confirm diagnosis between 1-21 days; treatment options will last for a maximum of 7 days and 2 weekly cycles are imposed between treatment regimens. In current practice, we assume that individuals return on day 8 for test results in the base-case.
- 3 The sensitivity (true positive) and specificity (true negative) of POCT for each infection does not vary across the different POC strategies nor does it vary between patient sub-groups.
- 4 The model accounts for the impact of single and dual infections (CT, NG, TV and MG).
- 5 The proportion lost-to-follow-up varies by STI and gender due to the nature of symptoms and severity of individual STIs.
- 6 STI symptoms remain at the same clinical level of severity across the time horizon.
- 7 The model incorporates an 'Other Infection' category which includes all other infections that cause similar lower genital symptoms diagnosed initially (day 0) that rule out an initial diagnosis of CT/NG/MG/TV. These may include candida and allergic reactions. The proportion of the cohort who we assume fall into the "Other infection" category is 1 in 2 for women, 1 in 3 for MSW and 1 in 4 for MSM. We vary this assumption in scenario analysis.
- 8 Once results from screening options are confirmed those with a confirmed STI are treated and partners are made aware of the infection to access treatment.
- 9 Each index infection is assumed to have 1 partner for women and MSW and 2 partners for MSM per 7-day period; this assumption, as well as the number of sexual acts per week, is varied in sensitivity analysis.
- 10 In the absence of any data on changes in sexual behaviour following diagnosis with an STI, it is assumed sexual behaviour is not changed due to a diagnosis. This assumption affords the identification of all potential transmissions; however, taken at face value would be an overestimation of transmissions.
- 11 The model assumes STI transmission rates are constant over the duration of exposure.
- 12 The model assumes different treatment regimens for the different infections as informed by clinical guidance.
- 13 The model assumes the correct treatment for true CT/NG/MG/TV infection is 100% efficacious and ignores antibiotic resistant strains in NG and MG, thereby underestimating the total costs associated with STI infection.
- 14 The model does not include re-infections.
- 15 The model does not consider adverse events associated with treatment options.
- 16 The model does not consider long-term complications associated with STI infection.
- 17 The model limits sub-group analysis to women, MSW and MSM; treatment pathways do not vary by sub-group.

CT, *Chlamydia trachomatis*; MG, *Mycoplasma genitalium*; MSM, men-who-have-sex-with-men; MSW, men-who-have-sex-with-women; NG, *Neisseria gonorrhoea*; POCT, point of care test; STI, sexually transmitted infection, TV, *Trichomonas vaginalis*.

Supplementary Table 2. Summary of GUM clinician survey (October 2016) relevant to patient pathways

| Survey question                                                                           | Median | Lowest | Highest |
|-------------------------------------------------------------------------------------------|--------|--------|---------|
| Roughly how many patients attend your service every month?                                | 1,700  | 80     | 6,000   |
| What proportion of your patients are MSM?                                                 | 10%    | 5%     | 100%    |
| What proportion of your patients are MSW?                                                 | 30%    | 0%     | 85%     |
| What proportion of your patients are women?                                               | 53%    | 0%     | 60%     |
| What proportion of MSM attend with a symptomatic lower genital tract infection?           | 50%    | 5%     | 90%     |
| What proportion of MSW attend with a symptomatic lower genital tract infection?           | 40%    | 0%     | 90%     |
| What proportion of women attend with a symptomatic lower genital tract infection?         | 50%    | 0%     | 80%     |
| What proportion of symptomatic men have a swab that is sent for microscopy?               | 80%    | 25%    | 100%    |
| What proportion of symptomatic men have a swab that is sent for culture?                  | 60%    | 5%     | 100%    |
| What proportion of symptomatic women have a swab that is sent for microscopy?             | 88%    | 0%     | 100%    |
| What proportion of symptomatic women have a swab that is sent for culture?                | 58%    | 0%     | 100%    |
| What proportion of MSM are tested for MG?                                                 | 0%     | 0%     | 10%     |
| What proportion of MSW are tested for MG?                                                 | 0%     | 0%     | 20%     |
| What proportion of women are tested for MG?                                               | 0%     | 0%     | 15%     |
| <b>Men who test negative for CT/NG</b>                                                    |        |        |         |
| What proportion return to your service for a follow-up appointment?                       | 50%    | 5%     | 100%    |
| Of those who return, what proportion receive further tests?                               | 25%    | 0%     | 80%     |
| Of those who return, what proportion receive presumptive treatment for another infection? | 18%    | 5%     | 90%     |
| What proportion are referred to / decide to attend another healthcare setting (e.g. GP)?  | 23%    | 0%     | 65%     |
| <b>Women who test negative for CT/NG</b>                                                  |        |        |         |
| What proportion return to your service for a follow-up appointment?                       | 30%    | 0%     | 75%     |
| Of those who return, what proportion receive further tests?                               | 50%    | 10%    | 100%    |
| Of those who return, what proportion receive presumptive treatment for another infection? | 28%    | 5%     | 100%    |
| What proportion are referred to / decide to attend another healthcare setting (e.g. GP)?  | 20%    | 0%     | 85%     |

CT, *Chlamydia trachomatis*; GP, General Practice; GUM, genitourinary medicine; MG, *Mycoplasma genitalium*; MSM, men-who-have-sex-with-men; MSW, men-who-have-sex-with-women; NG, *Neisseria gonorrhoea*; TV, *Trichomonas vaginalis*.

The online survey was completed by 23 GUM clinicians, 10 from London and 13 from elsewhere in the UK.

Supplementary Table 3. Scenarios assessed

|    |                                                                                                                                                           |
|----|-----------------------------------------------------------------------------------------------------------------------------------------------------------|
| 1  | Higher prevalence of MG and TV (double the current estimated prevalence)                                                                                  |
| 2  | Higher prevalence of MG and TV based on estimated prevalence in symptomatic patients in the US (MG: women 21.1%; men 19.3% and TV: women 25.9%; men 6.3%) |
| 3  | Increase proportion with 'Other infection' as follows: women: 66.6%, MSW: 50%, MSM: 50%                                                                   |
| 4  | Decrease proportion with 'Other infection' as follows: women: 33.3%, MSW: 25%, MSM: 20%                                                                   |
| 5  | 100% increase the rate of LTFU                                                                                                                            |
| 6  | 50% decrease the rate of LTFU                                                                                                                             |
| 7  | Specificity/sensitivity of POCT is 75%                                                                                                                    |
| 8  | Specificity/sensitivity of POCT is 80%                                                                                                                    |
| 9  | Specificity/sensitivity of POCT is 85%                                                                                                                    |
| 10 | Specificity/sensitivity of POCT is 85% for NG (but unaltered for CT, MG and TV)                                                                           |
| 11 | Specificity/sensitivity of POCT is 85% for CT (but unaltered for NG, MG and TV)                                                                           |
| 12 | Specificity/sensitivity of POCT is 85% for MG (but unaltered for CT, NG and TV)                                                                           |
| 13 | No microscopy used in any testing strategy                                                                                                                |
| 14 | 50% people get microscopy                                                                                                                                 |
| 15 | 75% people get microscopy                                                                                                                                 |
| 16 | 100% people get microscopy                                                                                                                                |
| 17 | 84% use of microscopy in current pathway and no use of microscopy in the POC strategy C                                                                   |
| 18 | No microscopy for men (only) in POC strategy C                                                                                                            |
| 19 | No microscopy for women (only) in POC strategy C                                                                                                          |
| 20 | Use of microscopy in POC strategy C only after a negative test result                                                                                     |
| 21 | No presumptive treatment for CT                                                                                                                           |
| 22 | 25% presumptive treatment for CT (of those not diagnosed with NG/TV in microscopy)                                                                        |
| 23 | 75% presumptive treatment for CT (of those not diagnosed with NG/TV in microscopy)                                                                        |
| 24 | 100% presumptive treatment for CT (of those not diagnosed with NG/TV in microscopy)                                                                       |
| 25 | Use 10% reduction in symptomatic utility scores                                                                                                           |
| 26 | Excluding the cost of PID (as not all PID will be treated in the GUM service)                                                                             |
| 27 | Inclusion of the drug costs for doxycycline as treatment for anyone NG/CT/MG/TV negative                                                                  |
| 28 | POCT CT-NG costs the same as laboratory based NAAT                                                                                                        |
| 29 | POCT CT-NG-MG cost the same as laboratory based NAAT                                                                                                      |
| 30 | POCT CT-NG-MG-TV costs the same as laboratory based NAAT                                                                                                  |
| 31 | All POCTs cost the same as laboratory based NAAT                                                                                                          |
| 32 | All POCTs cost £2 less than in base-case                                                                                                                  |

CT, *Chlamydia trachomatis*; GUM, genitourinary medicine; LTFU, lost-to-follow-up; MG, *Mycoplasma genitalium*; MSM, men-who-have-sex-with-men; MSW, men-who-have-sex-with-women; NAAT, nucleic acid amplification test; NG, *Neisseria gonorrhoea*; POC, point-of-care; POCT, point-of-care test; TV, *Trichomonas vaginalis*; US, United States (of America).

Supplementary Table 4. Cost-effectiveness comparison for scenario analyses using micro-costings - All

| Scenario | Cost-effectiveness comparison (£/QALY gained) |             |             |                |                |
|----------|-----------------------------------------------|-------------|-------------|----------------|----------------|
|          | POC A vs SC                                   | POC B vs SC | POC C vs SC | POC B vs POC A | POC C vs POC B |
| 1        | Dominated                                     | £ 17,389    | £ 41,381    | £7,153         | Dominated      |
| 2        | Dominated                                     | £ 20,530    | £ 56,548    | £8,228         | Dominated      |
| 3        | £ 224,378                                     | £ 22,979    | £ 69,517    | £12,300        | Dominated      |
| 4        | Dominated                                     | £ 15,818    | £ 24,163    | £7,107         | £6,353         |
| 5        | Dominated                                     | £ 19,691    | £ 35,749    | £9,196         | Dominated      |
| 6        | Dominated                                     | £ 19,363    | £ 36,221    | £9,196         | Dominated      |
| 7        | Dominated                                     | £ 21,665    | £ 82,996    | £8,870         | Dominated      |
| 8        | Dominated                                     | £ 21,220    | £ 69,561    | £8,865         | Dominated      |
| 9        | Dominated                                     | £ 20,735    | £ 57,596    | £8,891         | Dominated      |
| 10       | Dominated                                     | £ 19,726    | £ 39,414    | £8,986         | Dominated      |
| 11       | Dominated                                     | £ 20,431    | £ 43,314    | £8,265         | Dominated      |
| 12       | Dominated                                     | £ 19,647    | £ 40,917    | £10,034        | Dominated      |
| 13       | Dominated                                     | £ 16,204    | £ 29,594    | £8,703         | Dominated      |
| 14       | Dominated                                     | £ 18,061    | £ 33,245    | £8,989         | Dominated      |
| 15       | Dominated                                     | £ 19,088    | £ 35,286    | £9,140         | Dominated      |
| 16       | Dominated                                     | £ 20,191    | £ 37,493    | £9,297         | Dominated      |
| 17       | Dominated                                     | £ 19,476    | £ 16,053    | £9,196         | £23,574        |
| 18       | Dominated                                     | £ 19,476    | £ 28,889    | £9,196         | £7,998         |
| 19       | Dominated                                     | £ 19,476    | £ 23,566    | £9,196         | £14,332        |
| 20       | Dominated                                     | £ 19,476    | £ 16,053    | £9,196         | £23,574        |
| 21       | Dominated                                     | £7,339      | £9,092      | £3,792         | £2,859         |
| 22       | Dominated                                     | £ 12,055    | £ 18,039    | £5,910         | £552           |
| 23       | Dominated                                     | £ 32,870    | £ 91,155    | £14,987        | Dominated      |
| 24       | Dominated                                     | £ 64,300    | Dominated   | £27,913        | Dominated      |
| 25       | £ 46,988                                      | £ 17,310    | £ 15,627    | £10,948        | £4,554         |
| 26       | Dominated                                     | £ 19,510    | £ 36,120    | £9,211         | Dominated      |
| 27       | Dominated                                     | £ 19,476    | £ 37,040    | £9,196         | Dominated      |
| 28       | £ 43,475                                      | £ 19,476    | £ 36,060    | £21,718        | Dominated      |
| 29       | Dominated                                     | Cost-saving | £ 36,060    | Cost-saving    | Dominated      |
| 30       | Dominated                                     | £ 19,476    | Cost-saving | £9,196         | £74,924        |
| 31       | £ 43,475                                      | Cost-saving | Cost-saving | £218           | £20,817        |
| 32       | Dominated                                     | £ 16,667    | £ 31,058    | £9,196         | Dominated      |

POCT, point-of-care test strategy; QALY, quality-adjusted life year.

Supplementary Table 5. Cost-effectiveness comparison for scenario analyses using micro-costings - Women

| Women    |             | Cost-effectiveness comparison (£/QALY gained) |             |                |                |
|----------|-------------|-----------------------------------------------|-------------|----------------|----------------|
| Scenario | POC A vs SC | POC B vs SC                                   | POC C vs SC | POC B vs POC A | POC C vs POC B |
| 1        | Dominated   | £8,843                                        | £ 25,961    | £4,199         | Dominated      |
| 2        | Dominated   | £8,932                                        | £ 52,744    | £3,587         | Dominated      |
| 3        | Dominated   | £ 13,611                                      | £ 46,391    | £7,257         | Dominated      |
| 4        | Dominated   | £6,915                                        | £ 10,406    | £3,249         | £5,070         |
| 5        | Dominated   | £9,013                                        | £ 21,182    | £4,368         | £1,662         |
| 6        | Dominated   | £8,827                                        | £ 22,264    | £4,368         | £1,662         |
| 7        | Dominated   | £8,012                                        | £ 48,866    | £3,769         | £180           |
| 8        | Dominated   | £8,124                                        | £ 41,683    | £3,848         | £350           |
| 9        | Dominated   | £8,279                                        | £ 34,918    | £3,954         | £588           |
| 10       | Dominated   | £8,732                                        | £ 22,995    | £4,249         | £1,398         |
| 11       | Dominated   | £8,597                                        | £ 25,567    | £3,827         | £1,542         |
| 12       | Dominated   | £8,630                                        | £ 24,992    | £4,563         | £1,556         |
| 13       | Dominated   | £8,344                                        | £ 19,947    | £4,136         | £2,008         |
| 14       | Dominated   | £8,661                                        | £ 21,070    | £4,271         | £1,808         |
| 15       | Dominated   | £8,829                                        | £ 21,658    | £4,341         | £1,702         |
| 16       | Dominated   | £9,004                                        | £ 22,264    | £4,415         | £1,590         |
| 17       | Dominated   | £8,891                                        | Cost-saving | £4,368         | £14,160        |
| 18       | Dominated   | £8,891                                        | £ 21,874    | £4,368         | £1,662         |
| 19       | Dominated   | £8,891                                        | Cost-saving | £4,368         | £14,160        |
| 20       | Dominated   | £8,891                                        | Cost-saving | £4,368         | £14,160        |
| 21       | Dominated   | £4,042                                        | £1,678      | £1,846         | £6,724         |
| 22       | Dominated   | £6,046                                        | £8,172      | £2,856         | £4,238         |
| 23       | Dominated   | £ 13,250                                      | £ 69,756    | £6,878         | Dominated      |
| 24       | Dominated   | £ 20,769                                      | Dominated   | £11,866        | Dominated      |
| 25       | Dominated   | £9,256                                        | £9,545      | £5,197         | £7,575         |
| 26       | Dominated   | £8,930                                        | £ 21,981    | £4,383         | £1,662         |
| 27       | Dominated   | £8,891                                        | £ 23,150    | £4,368         | £951           |
| 28       | Dominated   | £8,891                                        | £ 21,874    | £6,916         | £1,662         |
| 29       | Dominated   | £ 143                                         | £ 21,874    | Cost-saving    | Dominated      |
| 30       | Dominated   | £8,891                                        | Cost-saving | £4,368         | £23,924        |
| 31       | Dominated   | £ 143                                         | Cost-saving | Cost-saving    | £10,304        |
| 32       | Dominated   | £6,671                                        | £ 15,666    | £4,368         | £1,662         |

POCT, point-of-care test strategy; QALY, quality-adjusted life year.

Supplementary Table 6. Cost-effectiveness comparison for scenario analyses using micro-costings - MSW

| MSW | Cost-effectiveness comparison (£/QALY gained) |             |             |             |                |
|-----|-----------------------------------------------|-------------|-------------|-------------|----------------|
|     | Scenario                                      | POC A vs SC | POC B vs SC | POC C vs SC | POC B vs POC A |
| 1   | £12,263                                       | £22,566     | £21,976     | £39,978     | £20,481        |
| 2   | £6,136                                        | £21,655     | £20,324     | £70,648     | £17,318        |
| 3   | £6,705                                        | £20,051     | £33,219     | £53,907     | £163,024       |
| 4   | £10,163                                       | £104,518    | £12,897     | Dominated   | Cost-saving    |
| 5   | £12,052                                       | £61,168     | £19,205     | Dominated   | Cost-saving    |
| 6   | £7,525                                        | £53,665     | £16,992     | Dominated   | Cost-saving    |
| 7   | £265,801                                      | Dominated   | £64,478     | Dominated   | Cost-saving    |
| 8   | £100,276                                      | Dominated   | £50,420     | Dominated   | Cost-saving    |
| 9   | £49,716                                       | Dominated   | £38,304     | Dominated   | Cost-saving    |
| 10  | £10,139                                       | £60,983     | £19,061     | Dominated   | Cost-saving    |
| 11  | £44,559                                       | £243,310    | £28,123     | Dominated   | Cost-saving    |
| 12  | £9,005                                        | £109,035    | £22,985     | Dominated   | Cost-saving    |
| 13  | £5,013                                        | £44,501     | £15,654     | Dominated   | Cost-saving    |
| 14  | £7,253                                        | £50,948     | £16,857     | Dominated   | Cost-saving    |
| 15  | £8,521                                        | £54,669     | £17,490     | Dominated   | Cost-saving    |
| 16  | £9,906                                        | £58,793     | £18,147     | Dominated   | Cost-saving    |
| 17  | £9,005                                        | £56,104     | Cost-saving | Dominated   | Cost-saving    |
| 18  | £9,005                                        | £56,104     | Cost-saving | Dominated   | Cost-saving    |
| 19  | £9,005                                        | £56,104     | £17,724     | Dominated   | Cost-saving    |
| 20  | £9,005                                        | £56,104     | Cost-saving | Dominated   | Cost-saving    |
| 21  | Cost-saving                                   | Cost-saving | Cost-saving | £20,002     | £929           |
| 22  | Cost-saving                                   | £9,663      | £4,599      | £121,977    | Cost-saving    |
| 23  | £80,063                                       | Dominated   | £62,970     | Dominated   | Cost-saving    |
| 24  | Dominated                                     | Dominated   | Dominated   | Dominated   | Cost-saving    |
| 25  | £3,870                                        | £24,112     | £7,614      | Dominated   | Cost-saving    |
| 26  | £9,005                                        | £56,104     | £17,724     | Dominated   | Cost-saving    |
| 27  | £9,005                                        | £56,104     | £18,456     | Dominated   | Cost-saving    |
| 28  | Cost-saving                                   | £56,104     | £17,724     | Dominated   | Cost-saving    |
| 29  | £9,005                                        | £2,696      | £17,724     | £36,667     | £26,789        |
| 30  | £9,005                                        | £56,104     | Cost-saving | Dominated   | Cost-saving    |
| 31  | Cost-saving                                   | £2,696      | Cost-saving | Dominated   | Cost-saving    |
| 32  | Cost-saving                                   | £42,549     | £12,624     | Dominated   | Cost-saving    |

MSW, Men-who-have-sex-with-women; POCT, point-of-care test strategy; QALY, quality-adjusted life year.

Supplementary Table 7. Cost-effectiveness comparisons for scenario analyses using micro-costings - MSM

| MSM Scenario | Cost-effectiveness comparison (£/QALY gained) |             |             |                |                |
|--------------|-----------------------------------------------|-------------|-------------|----------------|----------------|
|              | POC A vs SC                                   | POC B vs SC | POC C vs SC | POC B vs POC A | POC C vs POC B |
| 1            | £137,378                                      | £95,423     | £139,260    | £49,813        | Dominated      |
| 2            | £119,952                                      | £83,250     | £145,988    | £42,999        | Dominated      |
| 3            | £91,163                                       | £83,961     | £332,964    | £71,307        | Dominated      |
| 4            | £140,882                                      | £160,599    | £115,724    | £235,703       | £52,018        |
| 5            | £135,796                                      | £145,798    | £134,186    | £175,909       | £104,258       |
| 6            | £127,894                                      | £139,636    | £1,044      | £175,909       | £1,317         |
| 7            | £833,775                                      | £2,053,305  | £350,136    | Dominated      | £78,956        |
| 8            | £425,499                                      | £591,462    | £268,835    | £4,264,237     | £84,090        |
| 9            | £271,627                                      | £324,923    | £211,896    | £579,296       | £89,914        |
| 10           | £191,294                                      | £191,613    | £173,306    | £192,369       | £130,727       |
| 11           | £168,341                                      | £173,675    | £143,342    | £187,785       | £85,861        |
| 12           | £130,508                                      | £167,524    | £141,202    | £406,528       | £88,559        |
| 13           | £47,590                                       | £64,826     | £74,079     | £189,798       | £126,208       |
| 14           | £80,744                                       | £98,423     | £101,384    | £181,298       | £112,461       |
| 15           | £113,144                                      | £127,453    | £122,040    | £177,307       | £106,349       |
| 16           | £175,783                                      | £175,089    | £151,216    | £173,474       | £100,673       |
| 17           | £130,508                                      | £141,683    | £131,189    | £175,909       | £83,111        |
| 18           | £130,508                                      | £141,683    | £131,189    | £175,909       | £83,111        |
| 19           | £130,508                                      | £141,683    | £131,319    | £175,909       | £104,258       |
| 20           | £130,508                                      | £141,683    | £131,189    | £175,909       | £83,111        |
| 21           | £60,065                                       | £77,460     | £84,981     | £164,890       | £116,909       |
| 22           | £85,266                                       | £101,948    | £103,897    | £170,152       | £110,577       |
| 23           | £235,470                                      | £217,337    | £174,644    | £182,233       | £97,951        |
| 24           | £747,941                                      | £417,789    | £253,365    | £189,212       | £91,656        |
| 25           | £56,093                                       | £60,884     | £56,420     | £75,544        | £44,773        |
| 26           | £130,508                                      | £141,683    | £131,319    | £175,909       | £104,258       |
| 27           | £130,508                                      | £141,683    | £131,648    | £175,909       | £105,447       |
| 28           | Cost-saving                                   | £141,683    | £131,319    | £869,045       | £104,258       |
| 29           | £130,508                                      | Cost-saving | £131,319    | Cost-saving    | £681,008       |
| 30           | £130,508                                      | £141,683    | Cost-saving | £175,909       | Cost-saving    |
| 31           | Cost-saving                                   | Cost-saving | Cost-saving | Cost-saving    | Cost-saving    |
| 32           | £130,508                                      | £141,683    | £131,319    | £175,909       | £104,258       |

MSM, Men-who-have-sex-with-men; POCT, point-of-care test strategy; QALY, quality-adjusted life year.



**CHEERS Checklist**

**Items to include when reporting economic evaluations of health interventions**

The **ISPOR CHEERS Task Force Report**, *Consolidated Health Economic Evaluation Reporting Standards (CHEERS)—Explanation and Elaboration: A Report of the ISPOR Health Economic Evaluations Publication Guidelines Good Reporting Practices Task Force*, provides examples and further discussion of the 24-item CHEERS Checklist and the CHEERS Statement. It may be accessed via the *Value in Health* or via the ISPOR Health Economic Evaluation Publication Guidelines – CHEERS: Good Reporting Practices webpage: <http://www.ispor.org/TaskForces/EconomicPubGuidelines.asp>

| Section/item                    | Item No | Recommendation                                                                                                                                                                             | Reported on page No/line No |
|---------------------------------|---------|--------------------------------------------------------------------------------------------------------------------------------------------------------------------------------------------|-----------------------------|
| <b>Title and abstract</b>       |         |                                                                                                                                                                                            |                             |
| Title                           | 1       | Identify the study as an economic evaluation or use more specific terms such as “cost-effectiveness analysis”, and describe the interventions compared.                                    | P1, L1                      |
| Abstract                        | 2       | Provide a structured summary of objectives, perspective, setting, methods (including study design and inputs), results (including base case and uncertainty analyses), and conclusions.    | P2                          |
| <b>Introduction</b>             |         |                                                                                                                                                                                            |                             |
| Background and objectives       | 3       | Provide an explicit statement of the broader context for the study.<br>Present the study question and its relevance for health policy or practice decisions.                               | P4, L20-30                  |
| <b>Methods</b>                  |         |                                                                                                                                                                                            |                             |
| Target population and subgroups | 4       | Describe characteristics of the base case population and subgroups analysed, including why they were chosen.                                                                               | P5                          |
| Setting and location            | 5       | State relevant aspects of the system(s) in which the decision(s) need(s) to be made.                                                                                                       | P5                          |
| Study perspective               | 6       | Describe the perspective of the study and relate this to the costs being evaluated.                                                                                                        | P9, L3                      |
| Comparators                     | 7       | Describe the interventions or strategies being compared and state why they were chosen.                                                                                                    | P5                          |
| Time horizon                    | 8       | State the time horizon(s) over which costs and consequences are being evaluated and say why appropriate.                                                                                   | P2, P9                      |
| Discount rate                   | 9       | Report the choice of discount rate(s) used for costs and outcomes and say why appropriate.                                                                                                 | P9                          |
| Choice of health outcomes       | 10      | Describe what outcomes were used as the measure(s) of benefit in the evaluation and their relevance for the type of analysis performed.                                                    | P5                          |
| Measurement of effectiveness    | 11a     | <i>Single study-based estimates:</i> Describe fully the design features of the single effectiveness study and why the single study was a sufficient source of clinical effectiveness data. | N/A                         |



|    |                         |     |                                                                       |
|----|-------------------------|-----|-----------------------------------------------------------------------|
|    |                         |     | N/A                                                                   |
| 1  |                         | 11b | <i>Synthesis-based estimates:</i> Describe fully the methods used for |
| 2  |                         |     | identification of included studies and synthesis of clinical          |
| 3  |                         |     | effectiveness data.                                                   |
| 4  |                         |     | P5-6                                                                  |
| 5  | Measurement and         | 12  | If applicable, describe the population and methods used to            |
| 6  | valuation of preference |     | elicit preferences for outcomes.                                      |
| 7  | based outcomes          |     | N/A                                                                   |
| 8  | Estimating resources    | 13a | <i>Single study-based economic evaluation:</i> Describe approaches    |
| 9  | and costs               |     | used to estimate resource use associated with the alternative         |
| 10 |                         |     | interventions. Describe primary or secondary research methods         |
| 11 |                         |     | for valuing each resource item in terms of its unit cost.             |
| 12 |                         |     | Describe any adjustments made to approximate to opportunity           |
| 13 |                         |     | costs.                                                                |
| 14 |                         |     | N/A                                                                   |
| 15 |                         | 13b | <i>Model-based economic evaluation:</i> Describe approaches and       |
| 16 |                         |     | data sources used to estimate resource use associated with            |
| 17 |                         |     | model health states. Describe primary or secondary research           |
| 18 |                         |     | methods for valuing each resource item in terms of its unit           |
| 19 |                         |     | cost. Describe any adjustments made to approximate to                 |
| 20 |                         |     | opportunity costs.                                                    |
| 21 |                         |     | P9,10,11                                                              |
| 22 | Currency, price date,   | 14  | Report the dates of the estimated resource quantities and unit        |
| 23 | and conversion          |     | costs. Describe methods for adjusting estimated unit costs to         |
| 24 |                         |     | the year of reported costs if necessary. Describe methods for         |
| 25 |                         |     | converting costs into a common currency base and the                  |
| 26 |                         |     | exchange rate.                                                        |
| 27 |                         |     | P9,10,11                                                              |
| 28 | Choice of model         | 15  | Describe and give reasons for the specific type of decision-          |
| 29 |                         |     | analytical model used. Providing a figure to show model               |
| 30 |                         |     | structure is strongly recommended.                                    |
| 31 |                         |     | Figure 1                                                              |
| 32 | Assumptions             | 16  | Describe all structural or other assumptions underpinning the         |
| 33 |                         |     | decision-analytical model.                                            |
| 34 | Analytical methods      | 17  | Describe all analytical methods supporting the evaluation. This       |
| 35 |                         |     | could include methods for dealing with skewed, missing, or            |
| 36 |                         |     | censored data; extrapolation methods; methods for pooling             |
| 37 |                         |     | data; approaches to validate or make adjustments (such as half        |
| 38 |                         |     | cycle corrections) to a model; and methods for handling               |
| 39 |                         |     | population heterogeneity and uncertainty.                             |
| 40 |                         |     | P12                                                                   |
| 41 |                         |     |                                                                       |
| 42 | <b>Results</b>          |     |                                                                       |
| 43 | Study parameters        | 18  | Report the values, ranges, references, and, if used, probability      |
| 44 |                         |     | distributions for all parameters. Report reasons or sources for       |
| 45 |                         |     | distributions used to represent uncertainty where appropriate.        |
| 46 |                         |     | Providing a table to show the input values is strongly                |
| 47 |                         |     | recommended.                                                          |
| 48 |                         |     | Table 1                                                               |
| 49 | Incremental costs and   | 19  | For each intervention, report mean values for the main                |
| 50 | outcomes                |     | categories of estimated costs and outcomes of interest, as well       |
| 51 |                         |     | as mean differences between the comparator groups. If                 |
| 52 |                         |     | applicable, report incremental cost-effectiveness ratios.             |
| 53 |                         |     | Table 3 & 4                                                           |
| 54 | Characterising          | 20a | <i>Single study-based economic evaluation:</i> Describe the effects   |
| 55 | uncertainty             |     | of sampling uncertainty for the estimated incremental cost and        |
| 56 |                         |     | incremental effectiveness parameters, together with the impact        |
| 57 |                         |     | N/A                                                                   |

|                                                                      |     |                                                                                                                                                                                                                                                                            |         |
|----------------------------------------------------------------------|-----|----------------------------------------------------------------------------------------------------------------------------------------------------------------------------------------------------------------------------------------------------------------------------|---------|
|                                                                      |     | of methodological assumptions (such as discount rate, study perspective).                                                                                                                                                                                                  | N/A     |
|                                                                      | 20b | <i>Model-based economic evaluation</i> : Describe the effects on the results of uncertainty for all input parameters, and uncertainty related to the structure of the model and assumptions.                                                                               | P18, 19 |
| Characterising heterogeneity                                         | 21  | If applicable, report differences in costs, outcomes, or cost-effectiveness that can be explained by variations between subgroups of patients with different baseline characteristics or other observed variability in effects that are not reducible by more information. | P18     |
| <b>Discussion</b>                                                    |     |                                                                                                                                                                                                                                                                            |         |
| Study findings, limitations, generalisability, and current knowledge | 22  | Summarise key study findings and describe how they support the conclusions reached. Discuss limitations and the generalisability of the findings and how the findings fit with current knowledge.                                                                          | P19     |
| <b>Other</b>                                                         |     |                                                                                                                                                                                                                                                                            |         |
| Source of funding                                                    | 23  | Describe how the study was funded and the role of the funder in the identification, design, conduct, and reporting of the analysis. Describe other non-monetary sources of support.                                                                                        | P20     |
| Conflicts of interest                                                | 24  | Describe any potential for conflict of interest of study contributors in accordance with journal policy. In the absence of a journal policy, we recommend authors comply with International Committee of Medical Journal Editors recommendations.                          | P20     |

For consistency, the CHEERS Statement checklist format is based on the format of the CONSORT statement checklist

The **ISPOR CHEERS Task Force Report** provides examples and further discussion of the 24-item CHEERS Checklist and the CHEERS Statement. It may be accessed via the *Value in Health* link or via the ISPOR Health Economic Evaluation Publication Guidelines – CHEERS: Good Reporting Practices webpage: <http://www.ispor.org/TaskForces/EconomicPubGuidelines.asp>

The citation for the CHEERS Task Force Report is:  
 Husereau D, Drummond M, Petrou S, et al. Consolidated health economic evaluation reporting standards (CHEERS)—Explanation and elaboration: A report of the ISPOR health economic evaluations publication guidelines good reporting practices task force. *Value Health* 2013;16:231-50.
