# Supplementary material for: Modelling-based evaluation of the costs, benefits and cost-effectiveness of multipathogen point-of-care tests for sexually transmitted infections in symptomatic genitourinary medicine clinic attendees
Source: PubMed Central journal article supplement — BMJ Open. 2018 Sep 10;8(9):e020394. doi: 10.1136/bmjopen-2017-020394 (PMC6144481; doi:10.1136/bmjopen-2017-020394), 2018-09-10
Supplement: bmjopen-2017-020394supp001.pdf [file bmjopen-2017-020394supp001.pdf]

Supplementary Table 1. Key model assumptions

- 
- 1 The decision framework assumes that after a maximum of 3 courses of treatment the individual would be cured. In standard care, this could take up to 56 days in total; therefore, the cycle length is one day and time horizon is 56 days.
  - 2 Screening options will confirm diagnosis between 1-21 days; treatment options will last for a maximum of 7 days and 2 weekly cycles are imposed between treatment regimens. In current practice, we assume that individuals return on day 8 for test results in the base-case.
  - 3 The sensitivity (true positive) and specificity (true negative) of POCT for each infection does not vary across the different POC strategies nor does it vary between patient sub-groups.
  - 4 The model accounts for the impact of single and dual infections (CT, NG, TV and MG).
  - 5 The proportion lost-to-follow-up varies by STI and gender due to the nature of symptoms and severity of individual STIs.
  - 6 STI symptoms remain at the same clinical level of severity across the time horizon.
  - 7 The model incorporates an 'Other Infection' category which includes all other infections that cause similar lower genital symptoms diagnosed initially (day 0) that rule out an initial diagnosis of CT/NG/MG/TV. These may include candida and allergic reactions. The proportion of the cohort who we assume fall into the "Other infection" category is 1 in 2 for women, 1 in 3 for MSW and 1 in 4 for MSM. We vary this assumption in scenario analysis.
  - 8 Once results from screening options are confirmed those with a confirmed STI are treated and partners are made aware of the infection to access treatment.
  - 9 Each index infection is assumed to have 1 partner for women and MSW and 2 partners for MSM per 7-day period; this assumption, as well as the number of sexual acts per week, is varied in sensitivity analysis.
  - 10 In the absence of any data on changes in sexual behaviour following diagnosis with an STI, it is assumed sexual behaviour is not changed due to a diagnosis. This assumption affords the identification of all potential transmissions; however, taken at face value would be an overestimation of transmissions.
  - 11 The model assumes STI transmission rates are constant over the duration of exposure.
  - 12 The model assumes different treatment regimens for the different infections as informed by clinical guidance.
  - 13 The model assumes the correct treatment for true CT/NG/MG/TV infection is 100% efficacious and ignores antibiotic resistant strains in NG and MG, thereby underestimating the total costs associated with STI infection.
  - 14 The model does not include re-infections.
  - 15 The model does not consider adverse events associated with treatment options.
  - 16 The model does not consider long-term complications associated with STI infection.
  - 17 The model limits sub-group analysis to women, MSW and MSM; treatment pathways do not vary by sub-group.
- 

CT, *Chlamydia trachomatis*; MG, *Mycoplasma genitalium*; MSM, men-who-have-sex-with-men; MSW, men-who-have-sex-with-women; NG, *Neisseria gonorrhoea*; POCT, point of care test; STI, sexually transmitted infection, TV, *Trichomonas vaginalis*.

Supplementary Table 2. Summary of GUM clinician survey (October 2016) relevant to patient pathways

| Survey question                                                                           | Median | Lowest | Highest |
|-------------------------------------------------------------------------------------------|--------|--------|---------|
| Roughly how many patients attend your service every month?                                | 1,700  | 80     | 6,000   |
| What proportion of your patients are MSM?                                                 | 10%    | 5%     | 100%    |
| What proportion of your patients are MSW?                                                 | 30%    | 0%     | 85%     |
| What proportion of your patients are women?                                               | 53%    | 0%     | 60%     |
| What proportion of MSM attend with a symptomatic lower genital tract infection?           | 50%    | 5%     | 90%     |
| What proportion of MSW attend with a symptomatic lower genital tract infection?           | 40%    | 0%     | 90%     |
| What proportion of women attend with a symptomatic lower genital tract infection?         | 50%    | 0%     | 80%     |
| What proportion of symptomatic men have a swab that is sent for microscopy?               | 80%    | 25%    | 100%    |
| What proportion of symptomatic men have a swab that is sent for culture?                  | 60%    | 5%     | 100%    |
| What proportion of symptomatic women have a swab that is sent for microscopy?             | 88%    | 0%     | 100%    |
| What proportion of symptomatic women have a swab that is sent for culture?                | 58%    | 0%     | 100%    |
| What proportion of MSM are tested for MG?                                                 | 0%     | 0%     | 10%     |
| What proportion of MSW are tested for MG?                                                 | 0%     | 0%     | 20%     |
| What proportion of women are tested for MG?                                               | 0%     | 0%     | 15%     |
| <b>Men who test negative for CT/NG</b>                                                    |        |        |         |
| What proportion return to your service for a follow-up appointment?                       | 50%    | 5%     | 100%    |
| Of those who return, what proportion receive further tests?                               | 25%    | 0%     | 80%     |
| Of those who return, what proportion receive presumptive treatment for another infection? | 18%    | 5%     | 90%     |
| What proportion are referred to / decide to attend another healthcare setting (e.g. GP)?  | 23%    | 0%     | 65%     |
| <b>Women who test negative for CT/NG</b>                                                  |        |        |         |
| What proportion return to your service for a follow-up appointment?                       | 30%    | 0%     | 75%     |
| Of those who return, what proportion receive further tests?                               | 50%    | 10%    | 100%    |
| Of those who return, what proportion receive presumptive treatment for another infection? | 28%    | 5%     | 100%    |
| What proportion are referred to / decide to attend another healthcare setting (e.g. GP)?  | 20%    | 0%     | 85%     |

CT, *Chlamydia trachomatis*; GP, General Practice; GUM, genitourinary medicine; MG, *Mycoplasma genitalium*; MSM, men-who-have-sex-with-men; MSW, men-who-have-sex-with-women; NG, *Neisseria gonorrhoea*; TV, *Trichomonas vaginalis*.

The online survey was completed by 23 GUM clinicians, 10 from London and 13 from elsewhere in the UK.

Supplementary Table 3. Scenarios assessed

---

|    |                                                                                                                                                           |
|----|-----------------------------------------------------------------------------------------------------------------------------------------------------------|
| 1  | Higher prevalence of MG and TV (double the current estimated prevalence)                                                                                  |
| 2  | Higher prevalence of MG and TV based on estimated prevalence in symptomatic patients in the US (MG: women 21.1%; men 19.3% and TV: women 25.9%; men 6.3%) |
| 3  | Increase proportion with 'Other infection' as follows: women: 66.6%, MSW: 50%, MSM: 50%                                                                   |
| 4  | Decrease proportion with 'Other infection' as follows: women: 33.3%, MSW: 25%, MSM: 20%                                                                   |
| 5  | 100% increase the rate of LTFU                                                                                                                            |
| 6  | 50% decrease the rate of LTFU                                                                                                                             |
| 7  | Specificity/sensitivity of POCT is 75%                                                                                                                    |
| 8  | Specificity/sensitivity of POCT is 80%                                                                                                                    |
| 9  | Specificity/sensitivity of POCT is 85%                                                                                                                    |
| 10 | Specificity/sensitivity of POCT is 85% for NG (but unaltered for CT, MG and TV)                                                                           |
| 11 | Specificity/sensitivity of POCT is 85% for CT (but unaltered for NG, MG and TV)                                                                           |
| 12 | Specificity/sensitivity of POCT is 85% for MG (but unaltered for CT, NG and TV)                                                                           |
| 13 | No microscopy used in any testing strategy                                                                                                                |
| 14 | 50% people get microscopy                                                                                                                                 |
| 15 | 75% people get microscopy                                                                                                                                 |
| 16 | 100% people get microscopy                                                                                                                                |
| 17 | 84% use of microscopy in current pathway and no use of microscopy in the POC strategy C                                                                   |
| 18 | No microscopy for men (only) in POC strategy C                                                                                                            |
| 19 | No microscopy for women (only) in POC strategy C                                                                                                          |
| 20 | Use of microscopy in POC strategy C only after a negative test result                                                                                     |
| 21 | No presumptive treatment for CT                                                                                                                           |
| 22 | 25% presumptive treatment for CT (of those not diagnosed with NG/TV in microscopy)                                                                        |
| 23 | 75% presumptive treatment for CT (of those not diagnosed with NG/TV in microscopy)                                                                        |
| 24 | 100% presumptive treatment for CT (of those not diagnosed with NG/TV in microscopy)                                                                       |
| 25 | Use 10% reduction in symptomatic utility scores                                                                                                           |
| 26 | Excluding the cost of PID (as not all PID will be treated in the GUM service)                                                                             |
| 27 | Inclusion of the drug costs for doxycycline as treatment for anyone NG/CT/MG/TV negative                                                                  |
| 28 | POCT CT-NG costs the same as laboratory based NAAT                                                                                                        |
| 29 | POCT CT-NG-MG cost the same as laboratory based NAAT                                                                                                      |
| 30 | POCT CT-NG-MG-TV costs the same as laboratory based NAAT                                                                                                  |
| 31 | All POCTs cost the same as laboratory based NAAT                                                                                                          |
| 32 | All POCTs cost £2 less than in base-case                                                                                                                  |

---

CT, *Chlamydia trachomatis*; GUM, genitourinary medicine; LTFU, lost-to-follow-up; MG, *Mycoplasma genitalium*; MSM, men-who-have-sex-with-men; MSW, men-who-have-sex-with-women; NAAT, nucleic acid amplification test; NG, *Neisseria gonorrhoea*; POC, point-of-care; POCT, point-of-care test; TV, *Trichomonas vaginalis*; US, United States (of America).

Supplementary Table 4. Cost-effectiveness comparison for scenario analyses using micro-costings - All

| All | Cost-effectiveness comparison (£/QALY gained) |             |             |             |                |
|-----|-----------------------------------------------|-------------|-------------|-------------|----------------|
|     | Scenario                                      | POC A vs SC | POC B vs SC | POC C vs SC | POC B vs POC A |
| 1   | Dominated                                     | £ 17,389    | £ 41,381    | £7,153      | Dominated      |
| 2   | Dominated                                     | £ 20,530    | £ 56,548    | £8,228      | Dominated      |
| 3   | £ 224,378                                     | £ 22,979    | £ 69,517    | £12,300     | Dominated      |
| 4   | Dominated                                     | £ 15,818    | £ 24,163    | £7,107      | £6,353         |
| 5   | Dominated                                     | £ 19,691    | £ 35,749    | £9,196      | Dominated      |
| 6   | Dominated                                     | £ 19,363    | £ 36,221    | £9,196      | Dominated      |
| 7   | Dominated                                     | £ 21,665    | £ 82,996    | £8,870      | Dominated      |
| 8   | Dominated                                     | £ 21,220    | £ 69,561    | £8,865      | Dominated      |
| 9   | Dominated                                     | £ 20,735    | £ 57,596    | £8,891      | Dominated      |
| 10  | Dominated                                     | £ 19,726    | £ 39,414    | £8,986      | Dominated      |
| 11  | Dominated                                     | £ 20,431    | £ 43,314    | £8,265      | Dominated      |
| 12  | Dominated                                     | £ 19,647    | £ 40,917    | £10,034     | Dominated      |
| 13  | Dominated                                     | £ 16,204    | £ 29,594    | £8,703      | Dominated      |
| 14  | Dominated                                     | £ 18,061    | £ 33,245    | £8,989      | Dominated      |
| 15  | Dominated                                     | £ 19,088    | £ 35,286    | £9,140      | Dominated      |
| 16  | Dominated                                     | £ 20,191    | £ 37,493    | £9,297      | Dominated      |
| 17  | Dominated                                     | £ 19,476    | £ 16,053    | £9,196      | £23,574        |
| 18  | Dominated                                     | £ 19,476    | £ 28,889    | £9,196      | £7,998         |
| 19  | Dominated                                     | £ 19,476    | £ 23,566    | £9,196      | £14,332        |
| 20  | Dominated                                     | £ 19,476    | £ 16,053    | £9,196      | £23,574        |
| 21  | Dominated                                     | £7,339      | £9,092      | £3,792      | £2,859         |
| 22  | Dominated                                     | £ 12,055    | £ 18,039    | £5,910      | £552           |
| 23  | Dominated                                     | £ 32,870    | £ 91,155    | £14,987     | Dominated      |
| 24  | Dominated                                     | £ 64,300    | Dominated   | £27,913     | Dominated      |
| 25  | £ 46,988                                      | £ 17,310    | £ 15,627    | £10,948     | £4,554         |
| 26  | Dominated                                     | £ 19,510    | £ 36,120    | £9,211      | Dominated      |
| 27  | Dominated                                     | £ 19,476    | £ 37,040    | £9,196      | Dominated      |
| 28  | £ 43,475                                      | £ 19,476    | £ 36,060    | £21,718     | Dominated      |
| 29  | Dominated                                     | Cost-saving | £ 36,060    | Cost-saving | Dominated      |
| 30  | Dominated                                     | £ 19,476    | Cost-saving | £9,196      | £74,924        |
| 31  | £ 43,475                                      | Cost-saving | Cost-saving | £218        | £20,817        |
| 32  | Dominated                                     | £ 16,667    | £ 31,058    | £9,196      | Dominated      |

POCT, point-of-care test strategy; QALY, quality-adjusted life year.

Supplementary Table 5. Cost-effectiveness comparison for scenario analyses using micro-costings - Women

| Women | Cost-effectiveness comparison (£/QALY gained) |             |             |             |                |
|-------|-----------------------------------------------|-------------|-------------|-------------|----------------|
|       | Scenario                                      | POC A vs SC | POC B vs SC | POC C vs SC | POC B vs POC A |
| 1     | Dominated                                     | £8,843      | £ 25,961    | £4,199      | Dominated      |
| 2     | Dominated                                     | £8,932      | £ 52,744    | £3,587      | Dominated      |
| 3     | Dominated                                     | £ 13,611    | £ 46,391    | £7,257      | Dominated      |
| 4     | Dominated                                     | £6,915      | £ 10,406    | £3,249      | £5,070         |
| 5     | Dominated                                     | £9,013      | £ 21,182    | £4,368      | £1,662         |
| 6     | Dominated                                     | £8,827      | £ 22,264    | £4,368      | £1,662         |
| 7     | Dominated                                     | £8,012      | £ 48,866    | £3,769      | £180           |
| 8     | Dominated                                     | £8,124      | £ 41,683    | £3,848      | £350           |
| 9     | Dominated                                     | £8,279      | £ 34,918    | £3,954      | £588           |
| 10    | Dominated                                     | £8,732      | £ 22,995    | £4,249      | £1,398         |
| 11    | Dominated                                     | £8,597      | £ 25,567    | £3,827      | £1,542         |
| 12    | Dominated                                     | £8,630      | £ 24,992    | £4,563      | £1,556         |
| 13    | Dominated                                     | £8,344      | £ 19,947    | £4,136      | £2,008         |
| 14    | Dominated                                     | £8,661      | £ 21,070    | £4,271      | £1,808         |
| 15    | Dominated                                     | £8,829      | £ 21,658    | £4,341      | £1,702         |
| 16    | Dominated                                     | £9,004      | £ 22,264    | £4,415      | £1,590         |
| 17    | Dominated                                     | £8,891      | Cost-saving | £4,368      | £14,160        |
| 18    | Dominated                                     | £8,891      | £ 21,874    | £4,368      | £1,662         |
| 19    | Dominated                                     | £8,891      | Cost-saving | £4,368      | £14,160        |
| 20    | Dominated                                     | £8,891      | Cost-saving | £4,368      | £14,160        |
| 21    | Dominated                                     | £4,042      | £1,678      | £1,846      | £6,724         |
| 22    | Dominated                                     | £6,046      | £8,172      | £2,856      | £4,238         |
| 23    | Dominated                                     | £ 13,250    | £ 69,756    | £6,878      | Dominated      |
| 24    | Dominated                                     | £ 20,769    | Dominated   | £11,866     | Dominated      |
| 25    | Dominated                                     | £9,256      | £9,545      | £5,197      | £7,575         |
| 26    | Dominated                                     | £8,930      | £ 21,981    | £4,383      | £1,662         |
| 27    | Dominated                                     | £8,891      | £ 23,150    | £4,368      | £951           |
| 28    | Dominated                                     | £8,891      | £ 21,874    | £6,916      | £1,662         |
| 29    | Dominated                                     | £ 143       | £ 21,874    | Cost-saving | Dominated      |
| 30    | Dominated                                     | £8,891      | Cost-saving | £4,368      | £23,924        |
| 31    | Dominated                                     | £ 143       | Cost-saving | Cost-saving | £10,304        |
| 32    | Dominated                                     | £6,671      | £ 15,666    | £4,368      | £1,662         |

POCT, point-of-care test strategy; QALY, quality-adjusted life year.

Supplementary Table 6. Cost-effectiveness comparison for scenario analyses using micro-costings - MSW

| MSW | Cost-effectiveness comparison (£/QALY gained) |             |             |             |                |
|-----|-----------------------------------------------|-------------|-------------|-------------|----------------|
|     | Scenario                                      | POC A vs SC | POC B vs SC | POC C vs SC | POC B vs POC A |
| 1   | £12,263                                       | £22,566     | £21,976     | £39,978     | £20,481        |
| 2   | £6,136                                        | £21,655     | £20,324     | £70,648     | £17,318        |
| 3   | £6,705                                        | £20,051     | £33,219     | £53,907     | £163,024       |
| 4   | £10,163                                       | £104,518    | £12,897     | Dominated   | Cost-saving    |
| 5   | £12,052                                       | £61,168     | £19,205     | Dominated   | Cost-saving    |
| 6   | £7,525                                        | £53,665     | £16,992     | Dominated   | Cost-saving    |
| 7   | £265,801                                      | Dominated   | £64,478     | Dominated   | Cost-saving    |
| 8   | £100,276                                      | Dominated   | £50,420     | Dominated   | Cost-saving    |
| 9   | £49,716                                       | Dominated   | £38,304     | Dominated   | Cost-saving    |
| 10  | £10,139                                       | £60,983     | £19,061     | Dominated   | Cost-saving    |
| 11  | £44,559                                       | £243,310    | £28,123     | Dominated   | Cost-saving    |
| 12  | £9,005                                        | £109,035    | £22,985     | Dominated   | Cost-saving    |
| 13  | £5,013                                        | £44,501     | £15,654     | Dominated   | Cost-saving    |
| 14  | £7,253                                        | £50,948     | £16,857     | Dominated   | Cost-saving    |
| 15  | £8,521                                        | £54,669     | £17,490     | Dominated   | Cost-saving    |
| 16  | £9,906                                        | £58,793     | £18,147     | Dominated   | Cost-saving    |
| 17  | £9,005                                        | £56,104     | Cost-saving | Dominated   | Cost-saving    |
| 18  | £9,005                                        | £56,104     | Cost-saving | Dominated   | Cost-saving    |
| 19  | £9,005                                        | £56,104     | £17,724     | Dominated   | Cost-saving    |
| 20  | £9,005                                        | £56,104     | Cost-saving | Dominated   | Cost-saving    |
| 21  | Cost-saving                                   | Cost-saving | Cost-saving | £20,002     | £929           |
| 22  | Cost-saving                                   | £9,663      | £4,599      | £121,977    | Cost-saving    |
| 23  | £80,063                                       | Dominated   | £62,970     | Dominated   | Cost-saving    |
| 24  | Dominated                                     | Dominated   | Dominated   | Dominated   | Cost-saving    |
| 25  | £3,870                                        | £24,112     | £7,614      | Dominated   | Cost-saving    |
| 26  | £9,005                                        | £56,104     | £17,724     | Dominated   | Cost-saving    |
| 27  | £9,005                                        | £56,104     | £18,456     | Dominated   | Cost-saving    |
| 28  | Cost-saving                                   | £56,104     | £17,724     | Dominated   | Cost-saving    |
| 29  | £9,005                                        | £2,696      | £17,724     | £36,667     | £26,789        |
| 30  | £9,005                                        | £56,104     | Cost-saving | Dominated   | Cost-saving    |
| 31  | Cost-saving                                   | £2,696      | Cost-saving | Dominated   | Cost-saving    |
| 32  | Cost-saving                                   | £42,549     | £12,624     | Dominated   | Cost-saving    |

MSW, Men-who-have-sex-with-women; POCT, point-of-care test strategy; QALY, quality-adjusted life year.

Supplementary Table 7. Cost-effectiveness comparisons for scenario analyses using micro-costings - MSM

| MSM | Cost-effectiveness comparison (£/QALY gained) |             |             |             |                |
|-----|-----------------------------------------------|-------------|-------------|-------------|----------------|
|     | Scenario                                      | POC A vs SC | POC B vs SC | POC C vs SC | POC B vs POC A |
| 1   | £137,378                                      | £95,423     | £139,260    | £49,813     | Dominated      |
| 2   | £119,952                                      | £83,250     | £145,988    | £42,999     | Dominated      |
| 3   | £91,163                                       | £83,961     | £332,964    | £71,307     | Dominated      |
| 4   | £140,882                                      | £160,599    | £115,724    | £235,703    | £52,018        |
| 5   | £135,796                                      | £145,798    | £134,186    | £175,909    | £104,258       |
| 6   | £127,894                                      | £139,636    | £1,044      | £175,909    | £1,317         |
| 7   | £833,775                                      | £2,053,305  | £350,136    | Dominated   | £78,956        |
| 8   | £425,499                                      | £591,462    | £268,835    | £4,264,237  | £84,090        |
| 9   | £271,627                                      | £324,923    | £211,896    | £579,296    | £89,914        |
| 10  | £191,294                                      | £191,613    | £173,306    | £192,369    | £130,727       |
| 11  | £168,341                                      | £173,675    | £143,342    | £187,785    | £85,861        |
| 12  | £130,508                                      | £167,524    | £141,202    | £406,528    | £88,559        |
| 13  | £47,590                                       | £64,826     | £74,079     | £189,798    | £126,208       |
| 14  | £80,744                                       | £98,423     | £101,384    | £181,298    | £112,461       |
| 15  | £113,144                                      | £127,453    | £122,040    | £177,307    | £106,349       |
| 16  | £175,783                                      | £175,089    | £151,216    | £173,474    | £100,673       |
| 17  | £130,508                                      | £141,683    | £131,189    | £175,909    | £83,111        |
| 18  | £130,508                                      | £141,683    | £131,189    | £175,909    | £83,111        |
| 19  | £130,508                                      | £141,683    | £131,319    | £175,909    | £104,258       |
| 20  | £130,508                                      | £141,683    | £131,189    | £175,909    | £83,111        |
| 21  | £60,065                                       | £77,460     | £84,981     | £164,890    | £116,909       |
| 22  | £85,266                                       | £101,948    | £103,897    | £170,152    | £110,577       |
| 23  | £235,470                                      | £217,337    | £174,644    | £182,233    | £97,951        |
| 24  | £747,941                                      | £417,789    | £253,365    | £189,212    | £91,656        |
| 25  | £56,093                                       | £60,884     | £56,420     | £75,544     | £44,773        |
| 26  | £130,508                                      | £141,683    | £131,319    | £175,909    | £104,258       |
| 27  | £130,508                                      | £141,683    | £131,648    | £175,909    | £105,447       |
| 28  | Cost-saving                                   | £141,683    | £131,319    | £869,045    | £104,258       |
| 29  | £130,508                                      | Cost-saving | £131,319    | Cost-saving | £681,008       |
| 30  | £130,508                                      | £141,683    | Cost-saving | £175,909    | Cost-saving    |
| 31  | Cost-saving                                   | Cost-saving | Cost-saving | Cost-saving | Cost-saving    |
| 32  | £130,508                                      | £141,683    | £131,319    | £175,909    | £104,258       |

MSM, Men-who-have-sex-with-men; POCT, point-of-care test strategy; QALY, quality-adjusted life year.
